# Supplementary material for: Spatial alanine metabolism determines local growth dynamics of Escherichia coli colonies
Source: eLife. 2021 Nov 9;10:e70794. doi: 10.7554/eLife.70794 (PMC8579308; doi:10.7554/eLife.70794)
Supplement: Figure 1—source data 1. [file elife-70794-fig1-data1.xlsx]

## Sheet: Figure 1 - Panel A
	z (µm)
x (µm)	72 h	60 h	48 h	42 h	32 h	24 h	18 h	12 h
983.5	0
982.5	1.66182
981.5	2.7941
980.5	3.42929
979.5	3.74196
978.5	3.08105
977.5	2.94618
976.5	3.90154
975.5	3.4857
974.5	3.9749
973.5	4.56496
972.5	3.21627
971.5	5.02317
970.5	5.29447
969.5	6.41544
968.5	4.87905
967.5	3.53409
966.5	4.72569
965.5	4.55108
964.5	7.8953
963.5	8.55694
962.5	9.26656
961.5	10.0146
960.5	9.53497
959.5	9.52844
958.5	9.26896
957.5	8.98515
956.5	10.1898
955.5	11.1591
954.5	12.5221
953.5	12.543
952.5	12.4038
951.5	13.0847
950.5	14.7637
949.5	14.982
948.5	17.0505
947.5	15.1527
946.5	16.3806
945.5	16.8321
944.5	16.0698
943.5	18.9398
942.5	17.6704
941.5	19.3175
940.5	19.0971
939.5	18.5898
938.5	19.5712
937.5	18.9471
936.5	20.6822
935.5	21.6231
934.5	21.8065
933.5	22.3271
932.5	23.27
931.5	23.2375
930.5	23.6851
929.5	24.1056
928.5	24.1531
927.5	24.0952
926.5	24.7917
925.5	26.646
924.5	26.1986
923.5	25.6885
922.5	26.4914
921.5	27.8416
920.5	29.7994
919.5	28.701
918.5	28.7123
917.5	28.8109
916.5	28.8075
915.5	29.7986
914.5	29.3301
913.5	29.5514
912.5	30.2805
911.5	31.2758
910.5	31.9751
909.5	31.7434
908.5	32.6969
907.5	33.503
906.5	34.7628
905.5	34.471
904.5	35.955
903.5	35.0606
902.5	35.4983
901.5	35.5185
900.5	34.975
899.5	34.9005
898.5	34.5983
897.5	35.6508
896.5	36.1241
895.5	37.0493
894.5	37.0333
893.5	37.3848
892.5	39.094
891.5	39.7943
890.5	41.3971
889.5	40.9482
888.5	41.503
887.5	40.6526
886.5	40.3899
885.5	40.7632
884.5	40.6671
883.5	41.3709
882.5	41.3019
881.5	41.8477
880.5	41.4822
879.5	41.7999
878.5	41.7125
877.5	41.7563
876.5	43.5299
875.5	43.9474
874.5	45.1157
873.5	45.7654
872.5	45.825
871.5	46.0741
870.5	46.4913
869.5	46.5508
868.5	46.1551
867.5	46.5457
866.5	46.0884
865.5	46.9229
864.5	47.0942
863.5	47.5988
862.5	48.2082
861.5	48.0788
860.5	48.3869
859.5	48.1311
858.5	48.7173
857.5	48.8254
856.5	49.5906
855.5	50.2431
854.5	50.4199
853.5	51.2437
852.5	51.1274
851.5	51.7149
850.5	52.1263
849.5	51.797
848.5	52.5513
847.5	51.9818
846.5	52.8176
845.5	53.0898
844.5	52.9331
843.5	53.1558
842.5	52.7088
841.5	52.6157
840.5	53.7588
839.5	54.3022
838.5	54.8017
837.5	55.0364
836.5	54.954
835.5	55.2264
834.5	55.8032
833.5	56.3305
832.5	56.5896
831.5	56.1504
830.5	57.0627
829.5	56.4648
828.5	57.1064
827.5	57.87
826.5	57.9416
825.5	58.8694
824.5	58.7214
823.5	58.9777
822.5	59.1463
821.5	59.5474
820.5	60.2518
819.5	60.1755
818.5	60.2658
817.5	60.3541
816.5	60.6771
815.5	61.0637
814.5	60.9088
813.5	60.9641
812.5	61.0888
811.5	61.4092
810.5	61.752
809.5	62.6721
808.5	62.2568
807.5	63.2449
806.5	62.6984
805.5	62.7927
804.5	62.9907
803.5	62.165
802.5	63.2119
801.5	62.2534
800.5	62.5261
799.5	62.9374
798.5	63.0257
797.5	64.6731
796.5	63.8896
795.5	64.7129
794.5	64.187
793.5	64.3099
792.5	65.3807
791.5	64.9089
790.5	65.6262
789.5	65.9218
788.5	66.9654
787.5	67.6571
786.5	67.3798
785.5	67.6642
784.5	67.3599
783.5	66.9319
782.5	67.2367
781.5	67.5601
780.5	67.7452
779.5	68.578
778.5	68.8136
777.5	68.9786
776.5	70.0238
775.5	69.4217
774.5	70.6845
773.5	69.8046
772.5	70.2401
771.5	69.9559
770.5	70.3086
769.5	71.549
768.5	70.9037
767.5	71.5679
766.5	71.2534
765.5	71.2488
764.5	72.056
763.5	70.8284
762.5	71.3041
761.5	71.1058
760.5	70.7959
759.5	71.4611
758.5	70.9201
757.5	71.5108
756.5	71.8863
755.5	71.8138
754.5	72.2611
753.5	72.8548
752.5	73.4159
751.5	75.3768
750.5	76.2487
749.5	76.3106
748.5	77.0656
747.5	76.3712
746.5	77.1422
745.5	77.2136
744.5	78.4336
743.5	78.0967
742.5	78.3405
741.5	78.8943
740.5	78.5105
739.5	78.5446
738.5	78.4137
737.5	78.2557
736.5	78.3972
735.5	78.0225
734.5	78.703
733.5	78.6424
732.5	78.8713
731.5	80.306
730.5	80.0798
729.5	80.9413
728.5	80.5519
727.5	80.682
726.5	81.2218
725.5	81.5935
724.5	82.3852
723.5	83.3484
722.5	83.9442
721.5	84.3239
720.5	84.2372
719.5	84.1146
718.5	85.0329
717.5	83.8242
716.5	85.635
715.5	84.9743
714.5	84.415
713.5	84.8847
712.5	84.9558
711.5	84.9943
710.5	85.933
709.5	86.4992
708.5	88.0987
707.5	89.0226
706.5	89.6735
705.5	89.0778
704.5	88.1802
703.5	88.2923
702.5	88.0882
701.5	89.3979
700.5	89.7862
699.5	90.2818
698.5	90.3188
697.5	90.1503
696.5	89.7868
695.5	90.4371
694.5	90.7529
693.5	91.2013
692.5	91.4868
691.5	91.6188
690.5	92.5626
689.5	93.5335
688.5	94.1381
687.5	95.0601
686.5	95.2361
685.5	94.6928
684.5	94.6043
683.5	94.6709
682.5	96.0189
681.5	95.9777
680.5	96.9029
679.5	96.6602
678.5	96.8497
677.5	97.2361
676.5	96.5361
675.5	97.3763
674.5	96.5378
673.5	97.3997
672.5	98.3843
671.5	97.5696
670.5	97.8371
669.5	98.3875
668.5	100.309
667.5	101.968
666.5	101.896
665.5	102.37
664.5	103.118
663.5	103.241
662.5	102.712
661.5	102.843
660.5	102.134
659.5	102.093
658.5	103.135
657.5	102.733
656.5	103.898
655.5	103.869
654.5	104.167
653.5	103.161
652.5	103.391
651.5	104.939
650.5	104.902
649.5	106.778
648.5	106.228
647.5	106.927
646.5	109.225
645.5	108.435
644.5	110.607
643.5	108.294
642.5	109.451
641.5	108.734
640.5	109.897
639.5	110.297
638.5	110.001
637.5	109.896
636.5	110.052
635.5	111.668
634.5	111.162
633.5	111.28
632.5	110.192
631.5	111.648
630.5	112.764
629.5	113.075
628.5	115.09
627.5	113.816
626.5	114.466
625.5	113.193
624.5	113.117
623.5	114.915
622.5	115.642
621.5	118.019
620.5	117.462
619.5	118.12
618.5	117.034
617.5	115.11
616.5	115.952
615.5	115.596
614.5	117.442
613.5	118.153
612.5	118.297
611.5	119.805
610.5	120.649
609.5	121.16
608.5	121.974
607.5	121.495
606.5	120.654
605.5	120.911
604.5	120.088
603.5	121.283
602.5	121.197
601.5	122.082
600.5	125.199
599.5	124.23
598.5	124.851
597.5	123.137
596.5	122.121
595.5	122.722
594.5	122.246
593.5	125.323
592.5	125.639
591.5	126.731
590.5	127.809
589.5	126.969
588.5	128.056
587.5	128.117
586.5	128.186
585.5	128.861
584.5	128.712
583.5	129.676
582.5	129.266
581.5	130.197
580.5	130.947
579.5	132.096
578.5	131.115
577.5	129.873
576.5	128.485
575.5	129.502
574.5	129.428
573.5	130.634
572.5	132.435
571.5	132.197
570.5	134.455
569.5	133.635
568.5	134.076
567.5	134.725
566.5	134.674
565.5	136.156
564.5	136.046
563.5	137.453
562.5	139.394
561.5	139.711
560.5	139.591
559.5	137.496
558.5	137.418
557.5	136.846
556.5	135.925
555.5	135.655
554.5	135.238
553.5	136.26
552.5	137.421
551.5	138.103
550.5	138.263
549.5	138.897
548.5	137.803
547.5	139.102
546.5	139.23
545.5	139.09
544.5	139.857
543.5	139.725
542.5	141.092
541.5	140.266
540.5	140.477
539.5	140.909
538.5	140.894
537.5	141.425
536.5	142.209
535.5	143.515
534.5	143.348
533.5	143.68
532.5	143.595
531.5	144.004
530.5	145.245
529.5	145.597
528.5	145.659
527.5	145.33
526.5	145.261
525.5	145.27
524.5	146.205
523.5	146.937
522.5	146.46
521.5	147.637
520.5	146.886
519.5	147.277
518.5	147.133
517.5	147.932
516.5	148.255
515.5	148.444
514.5	148.905
513.5	149.086
512.5	149.351
511.5	149.595
510.5	150.094
509.5	149.999
508.5	149.934
507.5	149.866
506.5	150.2
505.5	150.734
504.5	151.831
503.5	152.914
502.5	153.617
501.5	154.339
500.5	154.463
499.5	152.601
498.5	152.829
497.5	151.796
496.5	151.507
495.5	151.211
494.5	150.318
493.5	151.33
492.5	151.981
491.5	152.82
490.5	153.794
489.5	154.707
488.5	155.753
487.5	156.233
486.5	155.802
485.5	154.974
484.5	155.345
483.5	153.983
482.5	155.585
481.5	156.489
480.5	158.407
479.5	159.279
478.5	159.701
477.5	159.577
476.5	158.296
475.5	160.047
474.5	158.982
473.5	159.154
472.5	159.128
471.5	157.706
470.5	159.23
469.5	158.395
468.5	160.426
467.5	160.437
466.5	160.503
465.5	160.735
464.5	160.759
463.5	160.334
462.5	159.874
461.5	161.366
460.5	161.579
459.5	162.277
458.5	162.134
457.5	163.032
456.5	163.483
455.5	163.101
454.5	164.33
453.5	163.173
452.5	164.772
451.5	164.461
450.5	164.758
449.5	166.112
448.5	163.928
447.5	165.221
446.5	164.18
445.5	165.107
444.5	165.439
443.5	165.254
442.5	166.239
441.5	166.208
440.5	167.208
439.5	166.29
438.5	166.539
437.5	168.129
436.5	167.821
435.5	168.683
434.5	169.051
433.5	169.197
432.5	168.951
431.5	169.991
430.5	169.637
429.5	170.315
428.5	170.171
427.5	170.372
426.5	170.91
425.5	169.574
424.5	170.793
423.5	169.909
422.5	169.203
421.5	169.81
420.5	168.406
419.5	169.729
418.5	169.145
417.5	170.018
416.5	169.648
415.5	169.284
414.5	170.951
413.5	170.735
412.5	171.268
411.5	171.443
410.5	171.875
409.5	171.481
408.5	171.364
407.5	171.929
406.5	172.053
405.5	172.169
404.5	171.743
403.5	172.199
402.5	171.921
401.5	172.75
400.5	172.653
399.5	172.186
398.5	172.989
397.5	171.914
396.5	173.073
395.5	172.237
394.5	172.51
393.5	172.898
392.5	171.976
391.5	173.062
390.5	172.063
389.5	172.811
388.5	172.551
387.5	172.404
386.5	172.812
385.5	172.353
384.5	172.836
383.5	172.453
382.5	172.755
381.5	172.667
380.5	172.557
379.5	172.741
378.5	172.808
377.5	172.627
376.5	172.576
375.5	172.87
374.5	172.526
373.5	172.939
372.5	172.866
371.5	172.544
370.5	173.17
369.5	172.108
368.5	173.384
367.5	172.507
366.5	172.712
365.5	173.036
364.5	172.238
363.5	173.263
362.5	172.573
361.5	173.06
360.5	172.813
359.5	172.565
358.5	173.281
357.5	172.525
356.5	173.082
355.5	172.664
354.5	173.022
353.5	172.851
352.5	172.708
351.5	173.162
350.5	172.857
349.5	172.863
348.5	172.718
347.5	173.169
346.5	172.67
345.5	173.161
344.5	172.762
343.5	173.029
342.5	173.212
341.5	172.61
340.5	173.415
339.5	172.693
338.5	172.915
337.5	173.219
336.5	172.544
335.5	173.445
334.5	172.698
333.5	173.446
332.5	173.11
331.5	172.831
330.5	173.673
329.5	172.598
328.5	173.529
327.5	172.987
326.5	173.123
325.5	173.189
324.5	172.967
323.5	173.413
322.5	173.006
321.5	173.106
320.5	173.081
319.5	173.391
318.5	172.8
317.5	173.406
316.5	172.969
315.5	172.928
314.5	173.361
313.5	172.609
312.5	173.568
311.5	172.597
310.5	173.219
309.5	173.258
308.5	172.731
307.5	173.52
306.5	172.575
305.5	173.309
304.5	173.025
303.5	172.841
302.5	173.46
301.5	172.533
300.5	173.385
299.5	172.867
298.5	173.057
297.5	173.205
296.5	172.693
295.5	173.254
294.5	173.034
293.5	172.911
292.5	173.087
291.5	173.142
290.5	172.812
289.5	173.175
288.5	173.065
287.5	172.927
286.5	173.398
285.5	172.511
284.5	173.543
283.5	172.714
282.5	173.051
281.5	173.354
280.5	172.687
279.5	173.423
278.5	172.612
277.5	173.463
276.5	172.85
275.5	172.985
274.5	173.346
273.5	172.62
272.5	173.427
271.5	172.692
270.5	173.143
269.5	173.099
268.5	172.803
267.5	173.194
266.5	172.873
265.5	173.049
264.5	173.056
263.5	173.145
262.5	172.882
261.5	173.149
260.5	173.122
259.5	172.895
258.5	173.22
257.5	172.639
256.5	173.357
255.5	172.856
254.5	173.061
253.5	173.142
252.5	172.62
251.5	173.425
250.5	172.632
249.5	173.302
248.5	172.868
247.5	172.803
246.5	173.223
245.5	172.415
244.5	173.381
243.5	172.717
242.5	172.958
241.5	173.004
240.5	172.77
239.5	173.141
238.5	172.816
237.5	172.999
236.5	172.864
235.5	173.13
234.5	172.928
233.5	173.307
232.5	173.066
231.5	173.054
230.5	173.088
229.5	172.546
228.5	173.152
227.5	172.622
226.5	173.049
225.5	172.884
224.5	172.515
223.5	173.253
222.5	172.632
221.5	173.275
220.5	172.741
219.5	172.517
218.5	172.962
217.5	172.215
216.5	173.005
215.5	172.262
214.5	172.562
213.5	172.806
212.5	172.322
211.5	172.952
210.5	172.374
209.5	172.627
208.5	172.318
207.5	172.602
206.5	172.512
205.5	172.567
204.5	172.471
203.5	172.424
202.5	172.683
201.5	172.281
200.5	172.74
199.5	172.189
198.5	172.543
197.5	172.433
196.5	172.381
195.5	172.749
194.5	171.983
193.5	172.967
192.5	172.015
191.5	172.592
190.5	172.539
189.5	172.225
188.5	172.73
187.5	172.24
186.5	172.607
185.5	172.507
184.5	172.499
183.5	172.479
182.5	172.251
181.5	172.228
180.5	172.106
179.5	172.26
178.5	172.12
177.5	172.226
176.5	172.133
175.5	172.14
174.5	172.332
173.5	172.125
172.5	172.255
171.5	172.074
170.5	172.228
169.5	172.186
168.5	172.29
167.5	172.341
166.5	171.839
165.5	172.588
164.5	171.987
163.5	172.404
162.5	172.259
161.5	172.028
160.5	172.422
159.5	171.984
158.5	172.512
157.5	171.984
156.5	172.151
155.5	172.152
154.5	172.155
153.5	172.279
152.5	171.983
151.5	172.323
150.5	172.054
149.5	172.019
148.5	172.18
147.5	172.084
146.5	172.248
145.5	172.174
144.5	172.263
143.5	172.112
142.5	172.327
141.5	172.167
140.5	172.147
139.5	172.315
138.5	171.962
137.5	172.458
136.5	171.964
135.5	172.263
134.5	172.193
133.5	171.799
132.5	172.338
131.5	171.906
130.5	172.323
129.5	171.914
128.5	172.105
127.5	172.142
126.5	172.053
125.5	172.232
124.5	171.925
123.5	172.227
122.5	172.05
121.5	172.057
120.5	172.082
119.5	172.224
118.5	171.976
117.5	171.986
116.5	172.24
115.5	171.832
114.5	172.283
113.5	171.865
112.5	172.143
111.5	172.199
110.5	171.795
109.5	172.349
108.5	171.836
107.5	172.036
106.5	172.056
105.5	171.806
104.5	172.195
103.5	171.826
102.5	172.136
101.5	171.956
100.5	171.891
99.5	172.046
98.5	171.817
97.5	172.062
96.5	171.989
95.5	171.945
94.5	171.991
93.5	171.901
92.5	172.004
91.5	171.932
90.5	172.039
89.5	171.915
88.5	172.207
87.5	171.943
86.5	172.484
85.5	172.425
84.5	172.577
83.5	172.684
82.5	172.419
81.5	172.788
80.5	172.355
79.5	172.805
78.5	172.418
77.5	172.749
76.5	172.775
75.5	172.703
74.5	173.059
73.5	172.663
72.5	172.813
71.5	172.907
70.5	172.866
69.5	173.048
68.5	172.594
67.5	173.01
66.5	172.809
65.5	172.766
64.5	173.076
63.5	172.463
62.5	172.345
61.5	172.513
60.5	172.291
59.5	172.46
58.5	172.287
57.5	172.295
56.5	172.323
55.5	172.44
54.5	171.865
53.5	171.896
52.5	171.516
51.5	171.726
50.5	171.73
49.5	171.499
48.5	171.843
47.5	171.471
46.5	171.839
45.5	171.568
44.5	171.692
43.5	171.735
42.5	171.55
41.5	171.747
40.5	171.595
39.5	171.732
38.5	171.679
37.5	171.629
36.5	171.691
35.5	171.684
34.5	171.654
33.5	171.686
32.5	171.72
31.5	171.584
30.5	171.736
29.5	171.633
28.5	171.716
27.5	171.671
26.5	171.595
25.5	171.792
24.5	171.583
23.5	171.673
22.5	171.711
21.5	171.578
20.5	171.747
19.5	171.558
18.5	171.769
17.5	171.629
16.5	171.645
15.5	171.727
14.5	171.564
13.5	171.736
12.5	171.623
11.5	171.69
10.5	171.688
9.5	171.627
8.5	171.691
7.5	171.657
6.5	171.665
5.5	171.664
4.5	171.688
3.5	171.646
2.5	171.707
1.5	171.657
734.5		0
733.5		0.799293
732.5		-0.0923807
731.5		0.454602
730.5		0.382755
729.5		1.39907
728.5		2.01817
727.5		4.36721
726.5		5.56918
725.5		5.2567
724.5		4.21808
723.5		5.21989
722.5		5.29915
721.5		9.14023
720.5		10.5964
719.5		11.1012
718.5		10.1581
717.5		8.84156
716.5		8.20383
715.5		8.16588
714.5		10.7603
713.5		13.4314
712.5		14.7186
711.5		17.4904
710.5		17.3879
709.5		15.9142
708.5		14.9709
707.5		14.5443
706.5		17.0273
705.5		18.8564
704.5		19.3167
703.5		19.712
702.5		18.1676
701.5		19.7148
700.5		20.0105
699.5		20.0572
698.5		21.5938
697.5		22.2635
696.5		21.8455
695.5		21.4667
694.5		18.9892
693.5		19.4706
692.5		20.8753
691.5		22.6502
690.5		24.102
689.5		26.4242
688.5		26.8132
687.5		26.08
686.5		24.777
685.5		25.4701
684.5		26.6391
683.5		26.1955
682.5		27.33
681.5		28.1714
680.5		30.4242
679.5		31.0015
678.5		29.3558
677.5		30.4071
676.5		28.8129
675.5		30.053
674.5		32.7422
673.5		32.0395
672.5		32.734
671.5		33.9348
670.5		36.0943
669.5		36.7505
668.5		35.1899
667.5		33.0964
666.5		32.4247
665.5		34.3078
664.5		37.1959
663.5		37.8543
662.5		37.0608
661.5		37.305
660.5		39.3991
659.5		41.1351
658.5		40.3646
657.5		38.5147
656.5		39.0585
655.5		39.421
654.5		40.8058
653.5		42.3475
652.5		42.4567
651.5		42.7125
650.5		42.3435
649.5		41.2799
648.5		43.4365
647.5		43.712
646.5		43.8366
645.5		44.7549
644.5		43.9028
643.5		46.5475
642.5		48.1076
641.5		47.9247
640.5		47.9177
639.5		47.8148
638.5		49.3023
637.5		48.0695
636.5		46.9384
635.5		46.839
634.5		46.5338
633.5		49.2561
632.5		48.7634
631.5		51.1813
630.5		52.7452
629.5		53.0569
628.5		54.1058
627.5		52.3294
626.5		52.8109
625.5		54.5256
624.5		55.2186
623.5		54.4184
622.5		52.2648
621.5		51.3094
620.5		52.6983
619.5		54.3642
618.5		55.2236
617.5		54.9223
616.5		55.6142
615.5		57.9047
614.5		58.385
613.5		59.5695
612.5		59.3543
611.5		60.1509
610.5		59.8659
609.5		59.7142
608.5		59.4243
607.5		59.8038
606.5		59.2842
605.5		58.3313
604.5		57.4923
603.5		60.0428
602.5		60.0848
601.5		60.0123
600.5		62.5443
599.5		65.1044
598.5		64.6792
597.5		65.5377
596.5		65.5997
595.5		65.6679
594.5		64.6861
593.5		64.0323
592.5		64.7802
591.5		63.5909
590.5		63.583
589.5		64.0548
588.5		65.412
587.5		67.7854
586.5		68.0623
585.5		69.1612
584.5		69.7978
583.5		69.5387
582.5		70.1204
581.5		69.5126
580.5		69.0502
579.5		68.2072
578.5		68.7085
577.5		69.5614
576.5		69.8203
575.5		71.7231
574.5		74.0447
573.5		72.6445
572.5		72.7367
571.5		72.7914
570.5		73.5448
569.5		74.634
568.5		73.9788
567.5		73.4688
566.5		73.3
565.5		74.421
564.5		75.7985
563.5		76.6314
562.5		78.0881
561.5		78.35
560.5		76.8267
559.5		78.1043
558.5		77.5711
557.5		77.6616
556.5		78.6048
555.5		78.907
554.5		78.7449
553.5		79.3432
552.5		78.5897
551.5		80.2038
550.5		82.0822
549.5		83.8257
548.5		83.704
547.5		81.8787
546.5		83.3079
545.5		82.3282
544.5		81.573
543.5		82.5863
542.5		83.7771
541.5		84.0929
540.5		84.1317
539.5		84.1263
538.5		84.5105
537.5		84.648
536.5		86.2206
535.5		86.3349
534.5		85.2228
533.5		86.8138
532.5		86.6488
531.5		87.0037
530.5		86.2286
529.5		87.2208
528.5		89.4169
527.5		88.6658
526.5		90.3687
525.5		90.6405
524.5		89.9893
523.5		90.5756
522.5		89.8807
521.5		90.5191
520.5		89.1843
519.5		88.5359
518.5		91.8684
517.5		93.6268
516.5		93.4733
515.5		93.5748
514.5		94.302
513.5		96.1062
512.5		96.3191
511.5		96.0473
510.5		96.0158
509.5		94.376
508.5		94.2128
507.5		94.0504
506.5		94.6241
505.5		94.0488
504.5		94.8183
503.5		95.1586
502.5		95.9333
501.5		96.8989
500.5		98.6539
499.5		98.4118
498.5		97.4458
497.5		96.4738
496.5		96.1862
495.5		99.7721
494.5		99.8126
493.5		100.107
492.5		101.145
491.5		100.369
490.5		100.162
489.5		100.404
488.5		100.81
487.5		102.731
486.5		103.875
485.5		102.505
484.5		102.294
483.5		101.79
482.5		101.651
481.5		102.372
480.5		105.907
479.5		106.944
478.5		105.234
477.5		105.352
476.5		104.771
475.5		105.996
474.5		106.639
473.5		106.672
472.5		108.016
471.5		106.957
470.5		107.437
469.5		106.225
468.5		105.635
467.5		110.556
466.5		111.093
465.5		111.639
464.5		111.091
463.5		109.468
462.5		109.853
461.5		111.203
460.5		112.145
459.5		111.502
458.5		110.874
457.5		111.544
456.5		111.891
455.5		112.028
454.5		113.463
453.5		114.499
452.5		115.471
451.5		116.526
450.5		116.343
449.5		116.336
448.5		116.54
447.5		115.958
446.5		115.904
445.5		115.146
444.5		114.414
443.5		116.151
442.5		116.704
441.5		119.387
440.5		118.727
439.5		118.494
438.5		119.922
437.5		119.942
436.5		121.636
435.5		121.747
434.5		121.821
433.5		121.479
432.5		120.355
431.5		119.613
430.5		118.733
429.5		119.867
428.5		122.351
427.5		123.35
426.5		123.476
425.5		123.472
424.5		124.43
423.5		125.568
422.5		125.121
421.5		125.958
420.5		126.521
419.5		126.548
418.5		126.661
417.5		124.761
416.5		124.241
415.5		124.738
414.5		126.29
413.5		127.071
412.5		127.224
411.5		127.907
410.5		129.206
409.5		129.713
408.5		130.919
407.5		130.076
406.5		130.192
405.5		130.703
404.5		130.694
403.5		130.333
402.5		128.844
401.5		130.354
400.5		132.066
399.5		131.994
398.5		131.362
397.5		131.694
396.5		132.006
395.5		133.475
394.5		134.023
393.5		134.264
392.5		135.909
391.5		135.735
390.5		135.014
389.5		135.701
388.5		133.754
387.5		134.228
386.5		135.509
385.5		136.259
384.5		136.77
383.5		135.654
382.5		135.672
381.5		136.311
380.5		137.499
379.5		138.922
378.5		138.723
377.5		138.962
376.5		138.688
375.5		138.467
374.5		139.621
373.5		139.204
372.5		139.632
371.5		139.693
370.5		141.134
369.5		142.536
368.5		141.178
367.5		141.791
366.5		141.118
365.5		140.901
364.5		141.346
363.5		141.903
362.5		142.937
361.5		142.131
360.5		142.443
359.5		143.874
358.5		144.513
357.5		145.797
356.5		145.281
355.5		144.136
354.5		143.37
353.5		142.333
352.5		144.445
351.5		145.208
350.5		145.24
349.5		146.324
348.5		146.624
347.5		147.958
346.5		147.597
345.5		147.166
344.5		146.793
343.5		147.146
342.5		147.748
341.5		148.868
340.5		149.577
339.5		149.505
338.5		149.209
337.5		149.108
336.5		147.882
335.5		146.86
334.5		148.165
333.5		148.81
332.5		149.82
331.5		150.158
330.5		150.746
329.5		150.479
328.5		150.314
327.5		149.648
326.5		150.074
325.5		151.094
324.5		151.861
323.5		153.057
322.5		153.343
321.5		153.363
320.5		153.13
319.5		153.775
318.5		154.274
317.5		154.023
316.5		153.415
315.5		152.211
314.5		152.265
313.5		153.474
312.5		153.602
311.5		154.005
310.5		154.752
309.5		154.562
308.5		154.929
307.5		154.99
306.5		154.894
305.5		154.446
304.5		154.389
303.5		154.895
302.5		155.343
301.5		155.439
300.5		155.893
299.5		155.816
298.5		156.645
297.5		156.597
296.5		157.07
295.5		157.621
294.5		157.646
293.5		157.412
292.5		156.34
291.5		156.488
290.5		157.879
289.5		157.595
288.5		158.907
287.5		158.858
286.5		158.801
285.5		159.209
284.5		158.78
283.5		158.756
282.5		158.702
281.5		158.379
280.5		158.846
279.5		158.607
278.5		159.209
277.5		158.926
276.5		159.004
275.5		159.707
274.5		158.965
273.5		159.273
272.5		159.056
271.5		159.114
270.5		159.975
269.5		159.721
268.5		160.2
267.5		159.883
266.5		159.647
265.5		160.11
264.5		159.09
263.5		159.597
262.5		159.261
261.5		158.836
260.5		160.194
259.5		159.984
258.5		160.588
257.5		160.968
256.5		160.878
255.5		161.196
254.5		160.823
253.5		160.895
252.5		161.017
251.5		160.808
250.5		161.263
249.5		160.684
248.5		161.211
247.5		161.128
246.5		160.934
245.5		161.101
244.5		160.946
243.5		161.095
242.5		161.267
241.5		161.01
240.5		161.362
239.5		160.847
238.5		161.359
237.5		161.013
236.5		161.128
235.5		161.614
234.5		160.896
233.5		161.325
232.5		161.143
231.5		160.859
230.5		161.478
229.5		160.931
228.5		161.322
227.5		161.192
226.5		161.147
225.5		161.427
224.5		161.25
223.5		161.358
222.5		161.297
221.5		161.334
220.5		161.38
219.5		161.082
218.5		161.262
217.5		161.464
216.5		161.486
215.5		161.929
214.5		161.351
213.5		161.546
212.5		161.746
211.5		161.35
210.5		161.873
209.5		161.542
208.5		161.787
207.5		161.727
206.5		161.591
205.5		161.852
204.5		161.604
203.5		161.784
202.5		161.727
201.5		161.641
200.5		161.982
199.5		161.336
198.5		161.809
197.5		161.717
196.5		161.673
195.5		162
194.5		161.71
193.5		161.51
192.5		162.189
191.5		161.904
190.5		162.186
189.5		162.217
188.5		161.986
187.5		162.133
186.5		161.998
185.5		162.475
184.5		161.863
183.5		162.34
182.5		162.22
181.5		161.984
180.5		162.301
179.5		161.924
178.5		162.126
177.5		162.164
176.5		161.956
175.5		162.493
174.5		161.954
173.5		162.124
172.5		162.051
171.5		161.953
170.5		162.334
169.5		162.055
168.5		162.232
167.5		162.029
166.5		162.045
165.5		162.324
164.5		161.818
163.5		162.22
162.5		162.345
161.5		161.794
160.5		162.621
159.5		161.862
158.5		162.04
157.5		162.445
156.5		162.05
155.5		162.297
154.5		162.197
153.5		162.011
152.5		162.065
151.5		162.001
150.5		162.331
149.5		161.916
148.5		162.362
147.5		162.077
146.5		161.698
145.5		162.321
144.5		161.833
143.5		162.007
142.5		162.243
141.5		161.781
140.5		162.222
139.5		161.841
138.5		161.991
137.5		162.102
136.5		161.912
135.5		162.249
134.5		161.927
133.5		161.944
132.5		162.035
131.5		161.791
130.5		162.267
129.5		161.828
128.5		162.117
127.5		161.997
126.5		161.662
125.5		162.157
124.5		161.78
123.5		161.781
122.5		162.179
121.5		161.647
120.5		161.956
119.5		161.768
118.5		161.801
117.5		161.644
116.5		161.71
115.5		161.965
114.5		161.647
113.5		161.773
112.5		161.82
111.5		161.505
110.5		162.032
109.5		161.631
108.5		161.688
107.5		161.788
106.5		161.305
105.5		161.855
104.5		161.509
103.5		161.37
102.5		161.492
101.5		161.145
100.5		161.588
99.5		161.395
98.5		161.402
97.5		161.563
96.5		161.144
95.5		161.573
94.5		161.081
93.5		161.047
92.5		161.068
91.5		160.817
90.5		161.132
89.5		160.846
88.5		160.632
87.5		160.71
86.5		160.339
85.5		160.54
84.5		160.427
83.5		160.427
82.5		160.476
81.5		160.286
80.5		160.525
79.5		160.219
78.5		160.486
77.5		160.391
76.5		160.398
75.5		160.456
74.5		160.292
73.5		160.323
72.5		160.439
71.5		160.309
70.5		160.525
69.5		160.363
68.5		160.35
67.5		160.469
66.5		160.166
65.5		160.519
64.5		160.275
63.5		160.492
62.5		160.428
61.5		160.308
60.5		160.482
59.5		160.279
58.5		160.404
57.5		160.475
56.5		160.284
55.5		160.479
54.5		160.31
53.5		160.341
52.5		160.409
51.5		160.366
50.5		160.526
49.5		160.317
48.5		160.433
47.5		160.346
46.5		160.257
45.5		160.493
44.5		160.371
43.5		160.392
42.5		160.486
41.5		160.271
40.5		160.417
39.5		160.305
38.5		160.465
37.5		160.444
36.5		160.296
35.5		160.459
34.5		160.278
33.5		160.339
32.5		160.483
31.5		160.313
30.5		160.48
29.5		160.382
28.5		160.342
27.5		160.431
26.5		160.266
25.5		160.475
24.5		160.349
23.5		160.414
22.5		160.435
21.5		160.302
20.5		160.424
19.5		160.343
18.5		160.39
17.5		160.443
16.5		160.334
15.5		160.408
14.5		160.348
13.5		160.389
12.5		160.422
11.5		160.349
10.5		160.434
9.5		160.352
8.5		160.401
7.5		160.399
6.5		160.334
5.5		160.427
4.5		160.363
3.5		160.391
2.5		160.414
1.5		160.355
0.5		160.397
601.5			0
600.5			0.665096
599.5			1.50474
598.5			1.50329
597.5			0.456749
596.5			1.46878
595.5			2.71684
594.5			3.24599
593.5			2.7179
592.5			2.88206
591.5			3.77824
590.5			5.14874
589.5			6.52162
588.5			6.24766
587.5			6.05086
586.5			6.84997
585.5			7.9521
584.5			8.86987
583.5			9.70156
582.5			9.16411
581.5			9.41224
580.5			10.6073
579.5			11.2265
578.5			12.2145
577.5			12.477
576.5			13.3064
575.5			13.5332
574.5			14.4064
573.5			15.3844
572.5			16.3781
571.5			17.0033
570.5			18.3443
569.5			17.9318
568.5			18.5694
567.5			19.7853
566.5			21.3218
565.5			21.6035
564.5			21.7903
563.5			22.8598
562.5			23.4064
561.5			23.9644
560.5			25.4471
559.5			25.8215
558.5			25.8819
557.5			26.7131
556.5			28.2462
555.5			28.0339
554.5			28.5523
553.5			30.1534
552.5			30.1593
551.5			30.5502
550.5			31.8053
549.5			31.9917
548.5			33.383
547.5			33.4993
546.5			33.6784
545.5			35.102
544.5			36.0664
543.5			36.3832
542.5			36.3957
541.5			36.1869
540.5			37.7877
539.5			40.238
538.5			40.4013
537.5			39.9729
536.5			39.5651
535.5			39.3528
534.5			40.8641
533.5			43.8349
532.5			44.3658
531.5			43.8738
530.5			43.5187
529.5			43.2038
528.5			44.7814
527.5			46.1635
526.5			46.8467
525.5			47.0853
524.5			47.4114
523.5			48.2027
522.5			48.4092
521.5			48.894
520.5			49.1302
519.5			48.7253
518.5			49.9979
517.5			51.5186
516.5			50.9721
515.5			51.222
514.5			51.3949
513.5			51.3225
512.5			52.1012
511.5			53.4571
510.5			54.3971
509.5			54.3592
508.5			54.3261
507.5			54.4376
506.5			54.5775
505.5			55.2131
504.5			55.9119
503.5			55.4246
502.5			55.5781
501.5			56.9103
500.5			58.0246
499.5			58.6405
498.5			59.5184
497.5			59.5937
496.5			59.2665
495.5			58.9197
494.5			59.217
493.5			59.9594
492.5			60.7131
491.5			60.8049
490.5			61.2451
489.5			61.9572
488.5			62.2698
487.5			62.1657
486.5			62.4382
485.5			63.4521
484.5			63.7967
483.5			63.9124
482.5			64.5168
481.5			64.4645
480.5			64.4475
479.5			65.541
478.5			66.305
477.5			66.845
476.5			67.4928
475.5			67.6691
474.5			67.7817
473.5			67.7138
472.5			67.8265
471.5			68.3122
470.5			69.7245
469.5			69.6017
468.5			69.745
467.5			70.1002
466.5			70.8003
465.5			71.5323
464.5			71.7377
463.5			71.7513
462.5			72.1496
461.5			73.0837
460.5			73.5086
459.5			73.4361
458.5			73.4572
457.5			73.5581
456.5			73.9554
455.5			74.4677
454.5			74.8159
453.5			75.4779
452.5			76.1067
451.5			76.7422
450.5			76.8784
449.5			76.7894
448.5			76.9464
447.5			77.4073
446.5			78.0725
445.5			78.2504
444.5			78.3233
443.5			78.4622
442.5			79.2355
441.5			79.8746
440.5			80.0064
439.5			79.8585
438.5			80.0219
437.5			80.3895
436.5			80.9053
435.5			81.2984
434.5			81.9519
433.5			82.174
432.5			82.4916
431.5			82.854
430.5			82.9081
429.5			83.0542
428.5			82.9834
427.5			83.5307
426.5			84.1535
425.5			84.4424
424.5			84.4935
423.5			84.7114
422.5			84.8073
421.5			84.9937
420.5			85.5324
419.5			86.1047
418.5			86.3017
417.5			86.6874
416.5			87.0019
415.5			87.3289
414.5			87.475
413.5			87.8194
412.5			87.9548
411.5			88.281
410.5			88.4317
409.5			88.6691
408.5			88.7021
407.5			89.0196
406.5			89.383
405.5			89.6822
404.5			89.904
403.5			90.2212
402.5			90.5842
401.5			91.1183
400.5			91.2538
399.5			91.5924
398.5			91.8812
397.5			92.1022
396.5			92.1509
395.5			92.2271
394.5			92.3031
393.5			92.6135
392.5			92.8134
391.5			93.2568
390.5			93.4962
389.5			93.8995
388.5			94.0046
387.5			94.2328
386.5			94.5717
385.5			94.9433
384.5			94.9607
383.5			95.1099
382.5			95.5365
381.5			95.908
380.5			96.1554
379.5			96.4825
378.5			96.6697
377.5			96.9808
376.5			97.2448
375.5			97.5102
374.5			97.5667
373.5			97.9631
372.5			98.1605
371.5			98.188
370.5			98.3875
369.5			98.7354
368.5			98.8686
367.5			99.1025
366.5			99.3778
365.5			99.7368
364.5			100.005
363.5			100.265
362.5			100.71
361.5			101.132
360.5			101.286
359.5			101.441
358.5			101.718
357.5			101.893
356.5			101.877
355.5			102.071
354.5			102.198
353.5			102.429
352.5			102.613
351.5			102.872
350.5			103.227
349.5			103.586
348.5			103.724
347.5			104.132
346.5			104.562
345.5			104.89
344.5			105.017
343.5			105.286
342.5			105.596
341.5			105.718
340.5			105.774
339.5			105.993
338.5			106.073
337.5			106.288
336.5			106.625
335.5			106.915
334.5			107.142
333.5			107.432
332.5			107.733
331.5			107.913
330.5			108.115
329.5			108.433
328.5			108.631
327.5			108.811
326.5			109.188
325.5			109.328
324.5			109.528
323.5			109.61
322.5			109.752
[truncated: 4,673 more rows]

## Sheet: Figure 1 - Panel B
time (h)	Volume (µm^3)			Height (µm)			Radius (µm)
	Replicate 1	Replicate 2	Replicate 3	Replicate 1	Replicate 2	Replicate 3	Replicate 1	Replicate 2	Replicate 3
12	8463.64	8629.82	6849.12	8.41667	8.76923	11.6	14.7925	15.8925	14.7925
18	245093	401453	344440	23.7778	25.125	26.4167	67.0119	79.003	74.8564
24	3.56084e+06	3.20865e+06	3.50504e+06	51	46.6667	47.4286	160.829	151.006	164.055
32	22861063	2.12706e+07	2.16918e+07	104	101.2	99	354.98	335.289	315.048
42	91275559	7.7432e+07	6.69705e+07	132	126	88	487.443	520.49	521.408
48	116668884	119826716	94239098	136	156	100	611.369	592.092	589.338
60	218428083	250941378	223807937	157.5	162.5	155	729.076	770.344	742.832
72	361422443	469547485	467763049	159	203	175	920.436	1020.99	1011.36

## Sheet: Figure 1 - Panel C
	z-score values
Gene	12 h	18 h	24 h	32 h	42 h	48 h	60 h	72 h
purE	-1.46489	1.08825	-1.15288	0.914494	0.683172	0.457499	0.324623	-0.850275
trmA	-0.914987	0.686509	-1.68135	0.170821	1.16925	0.854107	0.448719	-0.733064
yddL	-0.826709	0	-0.826709	1.3434	1.49841	-0.826709	0.465024	-0.826709
ymgH	-0.965983	0.463448	-0.161928	0.25499	1.93755	0.2401	-0.444836	-1.32334
yagY	0.282913	0.146062	-1.76985	0.904005	0.146062	0.588195	0.977695	-1.27508
ftsY	-0.553678	-0.73583	-1.56237	1.53323	0.180806	0.588198	0.919206	-0.369568
cobT	-0.595635	-0.659596	-1.25193	1.49978	-0.375944	0.387415	1.3941	-0.398191
ldrC	-0.322011	-0.663138	-1.19835	1.75415	-0.0808705	-0.074989	1.2307	-0.645493
nlpD	0.0232465	-0.680125	-1.56443	1.97924	-0.00666797	0.0063048	0.388219	-0.145784
yfdR	-0.370812	-0.066556	-1.5498	2.0252	-0.180652	0.503923	-0.218684	-0.14262
yggN	-0.38717	-0.406543	-1.57916	1.76776	0.371786	0.811661	-0.0635314	-0.514802
yfbB	-0.829776	0.513898	-1.40618	1.63235	-0.280091	-0.238101	1.04068	-0.432781
yiaW	-0.392641	0.59669	-2.12397	1.16556	0.126758	-0.343174	0.571957	0.398824
rpmJ	-0.929784	-0.0387496	-0.466574	2.16719	0.275578	-0.145283	0.181468	-1.04385
yhhF	-0.553204	0.594553	-1.13794	2.09483	0.0482411	-0.0486587	-0.220739	-0.777076
yjjY	-0.354328	-0.766636	-0.271163	2.00708	1.06064	-0.725639	-0.272334	-0.677615
ykgM_1	-0.0620565	-0.723992	-0.723992	2.05614	0.815008	0.0868791	-0.723992	-0.723992
dicB	-1.05098	-0.696106	0.491369	1.97913	0.368527	-0.095544	-1.05098	0.0545966
ldrB	-0.763617	-0.763617	0.213813	2.0814	-0.763617	0.353446	0.405808	-0.763617
rhoL	-0.620131	-0.620131	0.457984	2.25341	-0.744694	0.131543	-0.388186	-0.469796
tfaR	-0.353553	-0.353553	-0.353553	2.47487	-0.353553	-0.353553	-0.353553	-0.353553
lomR_2	-0.353553	-0.353553	-0.353553	2.47487	-0.353553	-0.353553	-0.353553	-0.353553
yedN_1	-0.353553	-0.353553	-0.353553	2.47487	-0.353553	-0.353553	-0.353553	-0.353553
sra	-1.39022	-0.897438	0.109458	2.03783	0.278831	0.00896168	-0.00867482	-0.138757
ygeR	-0.876668	-1.04051	-0.548983	2.14947	-0.277378	0.341705	0.0975905	0.154771
ilvL	-0.858244	-1.05612	0.0863734	1.98947	0.317761	0.603457	-0.285118	-0.79758
ychG_1	-0.599337	-0.964099	-0.128987	2.12198	0.110988	0.494948	-0.0713925	-0.964099
rcsF	-1.25613	-1.00452	-0.0979536	1.87367	0.0589815	0.668936	0.332571	-0.57556
ymfT	-0.943947	-1.33863	0.119501	1.7048	-0.501026	0.915442	0.413319	-0.369466
intA	-1.35647	0.197353	0.861749	1.65116	-0.627782	-1.08143	0.0651903	0.290226
yfgH	-0.648229	0.309745	0.526886	1.94469	-0.252267	-1.42738	0.105377	-0.558818
ycgK	-0.85683	0.336242	1.01402	1.90137	-0.371333	-0.616485	-0.675129	-0.731851
yniD	-0.905047	0.184988	0.885155	1.97519	-0.507224	-0.435616	-0.212835	-0.984611
ydfP	-1.70771	-0.428745	0.559549	1.16028	1.1409	-0.951959	0.171982	0.0557127
yoaH	-1.07662	-0.371733	1.14022	1.5448	0.631372	-1.0933	-0.140247	-0.634499
ydiV	-1.93988	0.298677	1.02521	0.744307	-0.66021	0.111408	0.919439	-0.49895
yejA	-1.89094	-0.0759303	0.674225	1.28167	-0.346719	0.0338482	0.919398	-0.595549
yfhL	-2.11997	0.366723	0.226337	1.0606	-0.446974	0.643916	0.656434	-0.387065
hemN	-1.73611	0.321558	0.772976	1.26536	0.105124	0.271315	0.241169	-1.2414
ypjD	-1.38176	-0.075962	0.699145	1.4324	0.021136	-0.221609	0.854837	-1.32819
yiiG	-1.84758	1.00705	0.00792956	1.1022	-0.0713655	-0.674009	0.864317	-0.388546
yqeJ	-1.549	0.759512	-0.159897	1.75887	-0.859448	-0.289814	0.27982	0.0599615
ydaO	-0.455308	0.698469	-1.10291	1.66367	0.0161291	0.430495	-1.4478	0.197258
ydfB	0.598953	0.926026	-0.872877	1.41664	-1.59244	0.0756357	-0.676633	0.124697
ydjA	0.440637	1.33871	-0.4218	1.29289	-0.850472	0.00890885	-1.53879	-0.270084
fabH	1.23602	0.700515	-0.617165	1.20499	-0.499799	0.217127	-0.709068	-1.53262
glnS	0.76301	1.03738	-0.471639	1.49351	-0.916341	0.0799524	-0.804881	-1.18099
ybfH	0.942925	0.702908	-0.702908	1.25152	0.462891	-0.462891	-0.497179	-1.69727
glpR	0.0173127	0.63401	-0.75356	1.63483	-1.4983	-0.0532428	0.754213	-0.735268
ypjB	0.208146	0.130696	-0.6438	1.48606	-1.45702	0.634119	0.750293	-1.1085
mrp	0.579583	0.715105	-0.705888	1.87103	-0.673003	-0.54645	-0.0576711	-1.18271
acrR	-0.268958	0.519242	-0.227746	2.13857	-0.667351	-0.277544	0.012664	-1.22888
yraL	0.189713	0.421582	0.126474	1.81581	-0.981684	-0.292096	0.25596	-1.53576
bioH	-0.789345	-0.120823	0.0452422	-1.06612	2.16152	0.509375	-0.274115	-0.46573
hokA	-0.853513	-0.853513	1.15475	-0.853513	1.58318	0.244339	0.431777	-0.853513
nrfB	0.669259	-0.76309	-0.694153	-0.74777	1.94076	-0.824367	-0.234576	0.65394
yahC	-0.544378	-0.177936	-0.643035	-1.09404	1.87978	-0.685317	0.27307	0.99186
insH_13	-0.353553	-0.353553	-0.353553	-0.353553	2.47487	-0.353553	-0.353553	-0.353553
ygeG	0.459776	-0.865704	-0.79943	0.161543	2.21604	-0.434923	-0.401786	-0.335512
cmk	1.72301	-0.713761	-1.14243	0.157111	1.04463	0.336071	-0.727286	-0.677344
tdcR	0.894862	-0.717502	-0.717502	-0.717502	1.34632	1.34632	-0.717502	-0.717502
yqgB	1.01078	-0.223893	-0.0760801	0.210851	1.57595	-0.276062	-0.458655	-1.76289
rpiB	0.176876	-0.338591	0.161715	-0.192037	-1.16738	0.626646	-1.17749	1.91026
dgkA	-0.0448236	-0.29006	-0.0510058	-0.988679	0.480687	0.540451	-1.45855	1.81198
ydcA	-0.100023	0.639386	0.143071	-0.449469	-0.0645718	-0.125345	-1.80168	1.75863
yicR	0.23638	-0.0722468	0.791908	-0.212532	0.387888	-1.09352	-1.58732	1.54945
insH_3	-0.534523	-0.534523	-0.534523	-0.534523	1.33631	-0.534523	-0.534523	1.87083
ygaQ	-0.65116	-0.65116	-0.65116	-0.270244	1.00634	-0.65116	-0.177589	2.04614
yddJ	-0.650126	-0.726988	-0.188953	-0.188953	0.887118	-0.00960777	-1.1113	1.98881
yhbQ	-0.317585	-1.15564	-0.363555	-0.805566	0.958944	0.249958	-0.460797	1.89424
yhhZ	0.618838	-0.213581	-1.22125	-0.257393	0.706461	-0.651697	-0.826943	1.84556
yjgN	0.476378	-0.105862	-0.608705	-0.264655	0.105862	-1.00569	-0.767498	2.17017
metI	-0.670869	-0.0173741	2.07434	-1.10071	0.200457	0.231265	-0.943523	0.226413
insH_6	-1.02409	-0.505563	1.46483	-0.401857	-0.298152	0.324078	-1.02409	1.46483
pfs	-1.15905	-1.1118	1.03119	0.131911	1.06964	0.364835	-1.16564	0.838918
btuC	-1.31813	-0.885766	0.866634	-0.564365	0.545233	1.39465	-0.782458	0.744196
ymfR	-1.08343	-0.901674	0.984031	0.0525384	0.268372	1.18851	-1.35606	0.847715
insJ	-0.836971	-0.555712	-0.655513	0.986673	1.01389	-1.47207	0.415083	1.10462
ydeM	-0.541244	-0.198016	0.145212	1.38611	0.382831	-2.04616	0.356429	0.514841
ccmD	0.426592	-1.17598	-1.05973	1.84649	-0.129742	0.152577	-0.686076	0.625876
hokE	0.172868	-0.777905	-0.691471	2.24728	-0.0864339	-0.617385	-0.580342	0.333388
ymfG	0.661803	0.0231104	-0.30464	2.03163	-0.74164	-0.825678	-1.03577	0.191188
ligT	0.260152	-1.89445	-0.864333	0.907582	0.281121	0.25753	-0.206417	1.25882
ykgM_2	1.16019	-1.15087	-0.827821	1.01109	-0.492344	0.191036	-1.02662	1.13534
ymgC	0.663108	-1.30317	-0.87305	0.68359	-0.442925	0.29443	-0.709193	1.68721
xylR	0.0766064	-1.09017	-0.500887	1.39659	-0.689456	-0.807312	0.0412488	1.57338
ylbE_1	-0.0390973	-0.57935	-0.57935	0.757065	-0.57935	-0.57935	-0.57935	2.17878
ynfN	0.133481	-0.795085	-0.795085	1.03883	0.17991	-0.795085	-0.795085	1.82811
ylbE_3	-0.674386	0.447669	-0.674386	-0.674386	1.10861	1.81565	-0.674386	-0.674386
potB	-0.878339	0.233802	-0.906143	0.532059	-0.190834	2.13708	-0.597776	-0.329851
ypjC	-1.72181	0.39734	-0.450318	0.927126	-0.238404	1.56287	0.079468	-0.556276
allD	-0.0764698	-0.710078	-0.163864	-0.731927	-0.84117	2.19578	0.578987	-0.251259
insH_10	-0.353553	-0.353553	-0.353553	-0.353553	-0.353553	2.47487	-0.353553	-0.353553
insH_16	-0.353553	-0.353553	-0.353553	-0.353553	-0.353553	2.47487	-0.353553	-0.353553
yacG	-0.274881	-0.552134	0.103654	-0.364767	0.410026	2.21534	-0.438195	-1.09905
yhhL	-1.11153	0.148487	0.532433	-0.0212125	-0.59395	2.12125	-0.655465	-0.420007
yqeK	-1.01147	-0.365251	0.744551	0.140481	0.0842887	1.98079	-1.01147	-0.561925
cobU	0.127772	-0.977389	-0.468185	0.946271	-1.21502	1.84398	-0.0834529	-0.173978
ldrA	-0.493103	-0.808689	0.0366305	0.859408	-0.752334	2.08794	-0.515645	-0.414206
ykgL	-0.203178	-1.01589	-0.494439	1.22964	0.229016	1.61955	-0.151503	-1.2132
yqgF	-0.186551	-1.11254	-1.08871	0.894309	-0.106407	1.91452	-0.0674178	-0.247201
tdcD	-0.0172938	0.428499	1.35083	-1.07797	0.1518	-1.80047	0.259406	0.705199
yadK	-1.35596	-0.034349	1.27418	-0.884893	0.449807	-0.361481	1.45738	-0.544675
aaeR	-0.635669	-0.672974	1.07019	-0.610233	-0.606842	-0.930717	1.71455	0.671702
kdsA	-1.27239	0.226343	1.10397	-1.03144	-0.517424	-0.576322	1.42766	0.6396
insN_2	-1.69873	-0.919839	1.37864	-0.13586	0.307037	-0.405671	0.777933	0.696481
ydhI	-1.57425	-0.640724	0.710882	-0.317141	0.607793	-0.921354	1.13183	1.00297
ydjI	-0.612145	-0.947837	1.28353	-0.928091	0.394933	-1.10581	0.908344	1.00708
yeeL_2	-1.19568	-0.585121	0.839521	-1.12784	0.613387	-0.675574	0.794294	1.33702
ygcH	-1.47366	0.42011	1.68512	-0.373327	-0.627826	-0.770047	0.435081	0.70455
yfdT	-0.767985	-0.140923	2.19389	-0.547846	-0.4211	-0.948099	0.292685	0.339381
yhhM	-1.03848	-0.022276	1.81284	-0.0434909	-0.134716	-1.34822	-0.111379	0.885733
ykiB	-1.21428	-0.593022	1.58139	0.367109	-0.31063	-1.21428	0.762456	0.621261
yagI	-0.453602	0.568416	1.71495	-0.395385	-0.642804	-1.48209	0.857881	-0.167371
yafP	-0.929078	1.24139	0.996181	-0.176869	-0.538062	-1.38306	1.1221	-0.332613
ygeO	-1.26106	0.678061	1.30261	-0.203356	-0.943746	-0.696949	1.33787	-0.213429
yhaI	-0.150922	0.871997	0.486306	-0.257127	-0.670766	-1.7384	1.55953	-0.100615
ycdQ	-0.753093	0.131581	0.344351	0.0195973	-0.237966	-1.18983	2.14729	-0.461934
htrE	-1.27319	-0.449811	-0.114359	0.495555	-0.0228719	-0.831007	2.05083	0.144854
yhiS	-1.22477	-0.0428907	0.204923	0.147735	-0.290704	-0.900706	2.13024	-0.0238282
ylbH	-1.39247	0.0956864	-0.182674	0.780882	-0.0113752	-1.0017	1.84079	-0.129143
yjhE	-1.16217	-0.143849	0.0879651	1.41261	-0.57436	-1.22013	1.31327	0.286662
yeeL_3	-0.442538	0.355003	0.00486301	0.938569	-1.25953	-1.25953	1.6194	0.0437675
yqiH	-1.00626	0.397963	0.349541	0.785333	-0.897307	-1.50257	1.30586	0.567437
yegW	-0.0765077	-0.387445	0.980683	1.21634	-1.17625	-0.400538	-1.27117	1.11488
elaA	0.529362	-0.724545	0.556401	1.27968	-1.85678	0.786228	-0.383187	-0.187157
rcsC_1	0.922782	-1.41416	1.03886	1.0079	-1.35612	0.299855	-0.249557	-0.249557
yfdS	0.0354107	-1.12921	0.617719	0.601981	-1.75873	1.35741	0.0826249	0.192791
moaE	1.52909	-0.839785	-0.572106	0.965926	0.293006	-0.497117	0.554725	-1.43374
yigA	1.32408	-0.544178	-0.789937	0.733514	-0.363622	0.767367	0.539164	-1.66639
creB	0.15574	-0.6589	-0.572644	1.1357	-0.591813	-1.06143	1.84013	-0.246788
ypjM	0.980989	-0.432236	-0.372099	1.28167	-0.592602	-1.08372	1.23156	-1.01356
yfjV	1.4069	-0.947793	0.178856	-0.722464	-1.29705	1.3731	0.0211247	-0.0126748
proS	1.76938	-1.45022	0.400807	-0.956175	0.458364	0.476518	-0.420025	-0.278649
potI	1.07535	-1.676	-0.155298	-1.30547	0.183382	0.421464	0.859064	0.59751
yfiH	1.68425	-1.64677	-0.26796	-0.329759	-0.444237	0.312536	0.952805	-0.260869
murC	1.37296	-1.35339	0.257124	-1.3506	-0.364725	0.492588	1.00684	-0.0607875
yjhU	1.56436	-0.966382	-0.0526286	-1.08689	-0.705528	0.0327971	1.38131	-0.167039
mdtA	1.37822	-1.14422	-1.22465	-0.257169	0.0831971	-0.188396	1.47264	-0.119623
prpR	1.25721	-1.59768	-1.01824	-0.320382	0.0814171	-0.0496961	1.24875	0.398627
yfdZ	1.20087	-1.20917	-1.44236	0.821683	-0.0937585	0.0183366	1.08808	-0.383683
moaD	1.43058	-1.64945	-0.908785	0.612201	-0.12133	-0.210147	0.977777	-0.130846
yjbB	1.56372	-1.68659	-1.04155	0.20105	0.181504	0.0837709	0.737185	-0.0390928
yciE	1.05847	-1.7975	-0.804847	1.11882	0.782374	-0.369517	0.0195834	-0.00738387
basR	1.28473	-1.89251	-0.363068	-0.0323469	0.622132	1.00971	-0.190165	-0.438495
mltA	1.36961	-1.85972	-0.641764	-0.04269	0.638462	0.777145	-0.445531	0.204487
nfi	0.691739	-2.14562	-0.203585	0.256287	0.533023	0.764994	0.735692	-0.632526
proB	0.651696	-2.25315	-0.067709	-0.145353	0.348111	0.666415	0.942033	-0.142041
mltB	1.19924	-1.91919	-0.380394	0.621231	-0.173689	0.881524	0.392835	-0.621549
ftsQ	1.24883	-1.80299	-0.540463	-0.273835	0.390575	0.92167	0.668013	-0.611805
yfcF	1.25741	-1.95839	-0.239785	0.115403	0.32957	0.90222	0.300575	-0.706998
nudC	0.995476	-1.99916	-0.637472	0.153114	0.602116	0.84246	0.52638	-0.48291
ygiF	0.871809	-2.03238	-0.768123	0.388946	0.241682	0.974993	0.553239	-0.230162
ybdR	1.77701	-1.75803	-0.632339	0.406702	0.220365	0.116844	0.175122	-0.305673
yehW	1.39623	-1.90412	-0.723377	0.517835	0.246253	0.53693	0.34067	-0.410422
yegS	1.47196	-1.98702	-0.243322	0.695425	0.287483	0.141009	0.111277	-0.476807
yfdC	1.3028	-1.92007	-0.432908	1.00672	0.318145	0.301168	-0.118498	-0.457354
treA	1.75431	-1.83261	-0.215741	0.468626	-0.143702	-0.203734	0.418599	-0.245757
tas	1.84633	-1.75278	0.365146	0.0164068	-0.443623	-0.0613269	0.318421	-0.28858
yncC	1.72128	-1.84512	0.200393	0.57513	-0.426606	0.0907138	-0.0536972	-0.262087
vsr	-0.0615438	-1.63708	0.766229	0.363112	0.781615	1.29243	-0.449275	-1.05549
pdxB	0.0430444	-1.81962	0.92314	-0.229725	1.2155	0.74079	-0.00367377	-0.869451
yfgL	0.71128	-1.58452	0.633129	-0.149127	1.46673	0.450779	-0.626333	-0.901936
ydbC	0.862645	-2.36263	0.34284	0.187609	0.156562	0.272764	-0.101566	0.641773
ydgJ	0.628542	-2.23138	0.209268	0.830503	-0.00804568	0.83936	-0.409604	0.141358
cysG	1.33487	-1.94456	0.615062	0.644607	0.432423	-0.247099	-0.569403	-0.2659
surA	0.809401	-2.05956	0.702301	0.830904	0.739104	-0.341821	-0.451816	-0.228517
msrA	1.00437	-2.12378	1.00274	0.499041	0.189704	-0.0967189	-0.0533464	-0.422014
yebT	1.03361	-2.21701	0.770731	-0.119428	0.538673	-0.0505354	0.261291	-0.217328
bolA	0.451743	-2.24552	1.07081	0.531105	0.331222	-0.390849	0.00174154	0.249749
rpoZ	0.0758667	-2.12523	1.26357	0.501314	0.685759	-0.381235	0.0733344	-0.0933827
ihfA	0.136347	-2.39102	0.505367	0.521873	0.807244	0.270527	0.0929113	0.0567513
yghU	0.232023	-2.38551	0.78544	0.561449	0.541765	0.129078	0.0231914	0.112561
azoR	-0.0443951	-1.95521	0.9986	0.633792	-0.63098	0.553438	0.919853	-0.475093
hfq	0.0854584	-1.74023	1.12347	1.15193	-0.377522	0.424012	0.310764	-0.977888
ybgI	-0.122319	-1.99867	1.30513	0.684126	-0.0309719	0.71941	-0.00862482	-0.548084
mscS	0.345266	-2.07956	1.03065	0.821554	0.515062	0.0796036	0.0267976	-0.739378
ybjP	0.0976693	-1.82912	0.866494	1.34098	0.516126	0.0397475	-0.131654	-0.900242
yceF	0.387453	-1.97805	0.904824	1.28701	0.283673	-0.0801329	-0.242123	-0.562654
ybgJ	-0.175894	-2.0783	0.444649	1.06703	0.309077	1.00494	-0.136215	-0.43528
ybgK	-0.338168	-2.08413	0.668737	0.990003	0.297364	0.889423	0.0582572	-0.481485
luxS	-0.174827	-2.07371	1.00753	0.920184	0.617304	0.060431	0.245154	-0.602065
ompX	-0.338995	-2.17119	0.792666	0.960255	0.482634	0.251463	0.414179	-0.391011
ydgA	-0.577278	-1.71195	0.896618	1.44305	0.552626	0.139108	-0.0178927	-0.724281
ykgC	-0.503002	-1.98172	0.470502	1.41889	0.452775	0.409935	0.163236	-0.430617
deoD	0.25676	-1.48875	0.514234	1.31006	0.658956	-0.0997641	0.326981	-1.47848
gshA	0.318092	-1.66452	0.401998	1.09018	0.711622	0.517024	0.0407715	-1.41517
menB	0.504054	-1.53002	1.01573	0.468331	0.66428	-0.270808	0.641165	-1.49272
psiF	-0.274733	-1.70933	-0.0965108	1.74869	0.433118	0.188141	0.434378	-0.723753
blc	0.487749	-2.22733	0.0947006	0.862019	0.316154	-0.130638	0.912527	-0.315184
moaC	1.01501	-2.07525	-0.04281	1.12902	0.137675	-0.19072	0.420288	-0.393215
pepN	0.917914	-2.11208	0.131644	1.09501	-0.00328655	0.250205	0.295347	-0.574758
dkgA	0.413747	-1.71668	-0.146677	1.44727	0.659936	0.0273786	0.397392	-1.08237
ybgS	0.660676	-1.91854	-0.0318882	1.47385	0.394959	0.170536	-0.0259062	-0.723681
hrpA	0.508401	-2.1943	0.0858876	1.0639	0.548575	0.274287	0.286755	-0.57351
yqjK	0.343083	-2.03936	0.158075	1.1172	0.77603	0.183139	0.309536	-0.847712
lolA	-0.877063	-1.20294	0.712978	0.347735	-0.189601	0.549122	1.6714	-1.01162
arsC	-1.00569	-1.49316	0.497721	0.174259	0.210706	0.497721	1.69134	-0.572892
tfaE	-0.969998	-1.39285	0.772513	-0.398454	0.0569221	0.470478	1.74832	-0.286933
yejB	-0.634954	-1.06762	1.28291	-0.089965	-0.605833	-0.164849	1.77798	-0.497667
yfjK	-0.144854	-1.16614	0.924572	-0.089835	-0.595319	-0.474965	1.994	-0.447457
yjcF	-0.858488	-1.18749	0.745394	0.00514061	-0.0771097	-0.323861	2.02027	-0.323861
clpP	-0.255734	-1.50806	-0.0892607	0.70194	0.162142	-0.000683143	1.84458	-0.854931
yjfK	0.141255	-1.18927	-0.132142	0.21416	0.0501228	-0.186821	2.10971	-1.00701
yieN	0.0415612	-1.82173	0.812389	0.165056	0.0035628	0.150128	1.49908	-0.850049
yncK_2	0.493758	-1.57952	1.01509	0.235099	-0.56895	-0.0797031	1.41009	-0.925859
tdcC	0.214717	0.106796	0.295658	-1.23322	-1.61993	-0.0730711	1.29392	1.01513
ydeR	0.080087	-0.200218	0.600652	-0.840914	-1.70185	0.400435	1.68183	-0.0200217
dsdA	0.58226	-1.00058	0.573215	-1.15435	-1.14982	-0.0146976	1.49127	0.672708
ydjG	-0.378209	-0.82254	0.341182	-0.434632	-1.28803	-0.258311	1.66007	1.18047
ecpD	0.139501	-1.36401	0.310002	0.728504	-1.30201	-0.403002	1.59651	0.294502
yafO	0.0420251	-0.842717	0.218974	0.378227	-1.62129	0.118703	1.8528	-0.14672
yaiF	-0.0553327	-2.00915	0.321184	0.168542	-0.849071	0.550148	0.779111	1.09457
yidL	-0.67698	-1.51107	0.751248	0.522731	-1.00833	-0.242799	1.05975	1.10545
ydhZ	0.28694	-0.0275151	1.13113	-1.13536	-1.82232	0.889241	0.398208	0.279683
ydiB	-0.223021	-0.130337	0.47211	-0.663271	-1.72914	1.76969	0.356255	0.147715
yiaN	-0.138618	-0.809821	1.40807	-0.109436	-1.83122	0.47422	0.15321	0.853596
yecO	0.0559556	-0.612646	-0.394561	0.193694	-1.49646	1.06603	1.67724	-0.489256
yneL	-0.712265	-0.393076	-0.0502427	-0.0147773	-1.4334	1.72303	1.12012	-0.239392
xseA	-0.794082	-1.3968	1.42232	-0.141294	-0.647732	1.08341	0.815744	-0.341558
yccF	-1.62169	-0.504183	0.708687	0.595446	-0.545904	0.219964	1.63548	-0.487793
ccmC	-1.01842	-0.975174	1.47249	0.343798	-0.97085	0.655161	1.03139	-0.5384
creA	-1.35972	-0.642254	1.26718	0.638324	-0.81519	0.271015	1.26432	-0.623675
yfaD	-1.65639	-0.447883	1.52512	0.081082	-0.513521	0.18147	1.1506	-0.320468
dicC	-1.3066	-0.662361	0.610016	1.60859	-1.24218	0.304002	0.448956	0.239577
yicL	-1.14869	-1.12292	1.40472	1.21055	-0.576494	-0.133169	0.713959	-0.347958
yjjP	-1.19714	-1.35367	0.766666	1.37146	-0.321964	0.325522	0.901855	-0.49273
ydcE	-1.30714	-1.3923	1.12691	1.12691	-0.0871428	-0.415909	0.172305	0.776363
ybaK	-0.532661	-1.52714	1.55017	1.01469	-0.828221	-0.252748	0.154083	0.421826
ykgJ	-1.16365	-1.20618	1.23808	1.35316	-0.758359	-0.0928794	0.164807	0.465023
glxR	-1.43817	-1.38836	1.2846	0.321669	-0.193002	1.00236	0.454487	-0.0435809
pepD	-1.08995	-1.48305	1.63557	0.54621	-0.0294554	0.575748	0.30635	-0.461426
slyB	-1.4286	-1.42536	1.41902	0.643319	0.408653	0.530362	0.0691916	-0.216585
yciT	-1.7866	-0.943002	1.53153	0.312438	-0.185376	0.327925	0.201812	0.541274
tehB	-1.48489	-1.47247	1.18184	0.980516	0.381251	0.246286	-0.0723603	0.239824
lipA	-1.52918	-1.57069	1.03928	0.521552	0.116794	0.464663	0.200922	0.756647
ydeE	-1.32097	-1.61936	1.3405	0.209022	0.116902	0.363223	0.1149	0.795787
manY	-1.30595	-1.54904	0.737356	0.737089	0.596042	0.927288	-0.611136	0.468352
hlpA	-1.06819	-1.87606	0.986306	0.606007	0.591374	0.567962	-0.296414	0.489021
manZ	-1.02648	-1.76811	1.05735	0.686531	0.322957	0.803813	-0.526649	0.450588
ydfG	-0.994261	-1.88138	0.938563	0.934267	0.446794	0.694887	-0.183399	0.0445261
pncB	-1.05697	-1.2823	1.34081	0.89487	0.443345	0.854028	-0.62412	-0.569665
yciU	-0.608185	-1.37762	1.37663	1.00841	0.345754	0.711626	-0.986619	-0.47
glgA	-0.732145	-1.84661	1.14153	1.00313	0.612451	0.317149	0.022638	-0.518142
glgP	-0.88166	-1.60009	1.42518	0.978852	0.49008	0.301316	-0.147726	-0.565954
pfkA	-0.648651	-1.76974	1.54564	0.670705	0.533338	0.291398	-0.161039	-0.461657
eda	-1.00876	-1.64604	1.17316	0.501179	0.836017	0.839467	-0.360353	-0.33467
yeaK	-1.17365	-1.80214	0.974687	0.527971	0.720521	0.676363	0.326693	-0.250443
csrA	-1.04595	-1.42271	0.236079	1.64088	0.855635	0.357701	-0.110366	-0.511273
hemB	-1.58732	-1.21522	0.491897	1.37179	0.671081	0.573188	0.0121647	-0.317579
nadA	-1.52964	-1.34976	0.621439	1.09638	0.786803	0.708234	0.0254552	-0.358912
nadB	-1.62461	-1.33514	0.484125	0.95395	0.8045	0.810636	0.203193	-0.296654
pnuC	-1.40673	-1.61322	0.647549	0.843604	0.810982	0.707898	0.258701	-0.248779
adhE	-1.11277	-1.73488	0.996707	1.18458	0.450224	0.366163	-0.0147893	-0.135228
narY	-1.22504	-1.67927	0.942342	1.15093	0.584464	0.248821	0.166233	-0.188468
narZ	-1.12121	-1.6588	0.789118	1.40034	0.469386	0.220257	0.209163	-0.308259
pmbA	-1.15877	-1.74852	0.419048	1.13321	0.494756	0.85642	0.286438	-0.28258
narU	-1.28207	-1.65146	0.580489	1.21938	0.517016	0.4858	0.448341	-0.317494
qor	-1.16509	-1.78058	0.449425	1.17045	0.70294	0.477771	0.361726	-0.216636
yehE	-1.05362	-1.86742	0.568561	1.01418	0.84163	0.573686	0.0335286	-0.110552
appY	-1.63409	-1.55398	0.509551	0.881374	0.470033	0.522843	0.576371	0.227899
cydA	-1.62499	-1.59901	0.493813	0.63639	0.592743	0.616926	0.566495	0.317629
cydB	-1.62361	-1.59685	0.435735	0.618144	0.640752	0.610768	0.598506	0.31655
artP	-1.58071	-1.55164	0.321745	0.836506	0.863094	0.60154	0.418977	0.0904889
moeB	-1.5549	-1.50548	0.228012	0.969306	0.598025	0.90088	0.392744	-0.0285907
proP	-1.77573	-1.26522	0.246912	0.900234	0.562864	0.578758	0.845114	-0.0929371
nanR	-1.90954	-1.26365	0.783472	0.497315	0.465241	0.469642	0.467756	0.489768
arcB	-1.87233	-1.18658	0.703827	0.875739	0.462134	0.747598	0.0472602	0.222344
ptsN	-1.73162	-1.35682	0.856367	0.64893	0.458517	0.840914	0.297438	-0.013718
artI	-1.53014	-1.63343	0.844182	0.612974	0.739386	0.171354	0.466998	0.328684
narW	-1.21736	-1.80858	0.595629	0.857339	0.869543	0.0694956	0.629529	0.00440707
cydC	-1.45303	-1.72875	0.838414	0.334703	0.393027	0.537955	0.712928	0.364749
ribC	-1.40108	-1.70894	0.765185	0.371815	0.543968	0.215442	1.00304	0.210565
narV	-1.30137	-1.82618	0.502561	0.547691	0.287224	0.465167	1.0106	0.314302
ydiP	-1.31839	-1.72756	0.657834	0.514188	0.257366	0.579482	1.08442	-0.0473378
gor	-1.17786	-1.8766	0.396232	0.896063	0.191581	0.92029	0.459348	0.190943
tyrS	-1.15963	-1.71399	0.112631	1.0502	0.257081	1.22899	0.120807	0.103909
ompC	-1.4483	-1.70519	0.564432	0.771111	0.567239	0.731885	0.0478075	0.471017
sstT	-1.40342	-1.78793	0.692018	0.714656	0.400481	0.55937	0.288649	0.536181
ycbW	-1.58438	-1.4776	0.748972	0.749623	-0.0900199	0.957011	0.255734	0.440658
yjcO	-1.24694	-1.79533	0.353124	0.748308	0.025236	0.657388	0.233567	1.02465
map	-0.951804	-0.456026	1.02427	1.4708	0.426243	0.524272	-1.28436	-0.7534
metJ	-1.55332	-0.26043	1.04832	1.35075	0.512075	0.409256	-0.628497	-0.87816
guaB	-1.60138	0.106711	0.111036	1.80039	0.186001	0.508686	-0.195552	-0.915887
dicA	-2.03621	-0.256602	0.414902	1.47423	0.136006	0.472956	0.196753	-0.402035
rcsD	-1.6275	-0.537777	0.79878	1.47346	0.0473096	0.747586	-0.0733652	-0.828491
rfaQ	-1.63128	-0.260859	0.707008	1.56152	-0.314629	0.847973	-0.679396	-0.230341
nadC	-1.31516	-1.11334	1.26627	0.948678	-0.0979765	1.09887	-0.406185	-0.381153
orn	-1.52865	-1.25434	0.783705	1.18165	0.18678	0.975919	-0.300032	-0.045035
sohB	-1.64069	-0.618004	1.28977	1.21855	-0.242534	0.681965	-0.253597	-0.435455
yhbH	-1.85367	-0.495469	1.20991	1.20608	-0.0162647	0.454329	-0.0711569	-0.433759
ykgA	-1.2862	-0.817464	1.57127	1.21521	-0.371267	0.507605	-0.389296	-0.429859
hemG	-1.94072	-0.586589	0.804621	0.917466	0.943258	0.533794	-0.335108	-0.336719
nagC	-2.15669	0.395817	0.770595	0.772712	0.664726	0.387349	-0.59194	-0.242573
def	-2.0671	0.0535835	-0.0337505	1.38926	0.64659	0.499588	-0.188418	-0.299752
purC	-2.15959	-0.0131876	0.245515	0.840684	0.954084	0.70322	-0.259828	-0.310895
dipZ	-1.34613	-0.765529	0.275248	0.71392	1.43214	1.02357	-0.546192	-0.787031
pykF	-1.41383	-0.837581	0.283752	1.44392	0.814869	0.756096	-0.105221	-0.942007
rfaD	-1.42373	-0.829468	-0.0400627	1.44276	0.799234	0.945747	-0.0807953	-0.81368
yihI	-1.15468	-0.945759	-0.200724	1.34772	1.29447	0.773198	-0.453678	-0.660546
yieP	-1.81914	-1.02658	0.108668	0.737873	0.51474	1.30524	0.308612	-0.12941
fpr	-1.56428	-1.15716	0.211241	1.0167	0.593119	0.95305	0.634819	-0.687491
ymfL	-1.88087	-0.785562	0.387499	1.13799	0.641042	0.644423	0.458491	-0.603011
seqA	-0.706417	-1.65744	0.461818	1.06054	-0.735624	0.89717	-0.307575	0.987525
yfjI	-0.645689	-1.1461	0.468125	1.74336	-0.694116	-0.193707	-0.597263	1.06539
insC_8	-1.46773	-1.07194	0.511234	0.423279	-0.350717	0.695937	-0.333126	1.59307
ydfA	-1.62704	-1.04562	0.210999	0.548597	-0.070333	0.173488	0.117222	1.69268
yhfL	-1.19722	-0.961397	-0.591577	1.15569	-0.227118	0.994896	-0.473664	1.3004
manX	-1.48425	-1.13653	-0.348241	1.05908	0.247205	0.629295	-0.280541	1.31398
ycgE	-1.554	-1.31258	-0.148893	0.769536	0.224737	0.680121	0.02419	1.31689
yhfU	-1.26521	-1.39059	-0.349547	1.21202	-0.00379951	0.319152	0.155776	1.3222
yddW	-0.865084	-1.57025	0.00174199	1.23369	0.0184657	1.19467	-0.653254	0.640016
greB	-1.58905	-1.21485	-0.181453	1.17749	0.332929	1.00719	-0.181453	0.649204
yidX	-1.5145	-1.14362	0.0260599	1.32961	0.443019	0.960927	-0.553294	0.451798
ribA	-1.69038	-0.4859	-0.381232	1.57444	-0.481874	0.292667	0.213763	0.958514
ydiM	-1.20237	-1.09667	-0.171768	1.75732	-0.72671	0.383174	0.515303	0.541729
bfd	-1.6341	-1.11335	-0.366672	1.24825	-0.156665	0.594932	0.706662	0.720936
ymfJ	-1.24995	-1.45684	-0.208436	1.43253	-0.252643	0.270768	0.80302	0.661558
yjiX	-1.55273	-1.34468	0.240492	1.21995	-0.0522408	0.00851504	0.479833	1.00086
yqfE	-1.50553	-0.998406	-0.18489	1.07764	0.375063	-0.544105	0.380345	1.39988
ybbL	-1.89483	0.2003	0.459086	-0.0626263	0.486	0.717872	1.14228	-1.04808
htrL	-2.37106	0.724642	0.0731521	0.497744	0.55166	0.364076	0.353967	-0.194183
napF	-2.26602	-0.333459	0.762273	0.36929	0.304563	0.193603	0.951831	0.0179154
phnA	-2.34358	-0.0488147	0.535062	0.422631	0.676278	0.127706	0.744171	-0.113449
ybjX	-2.37793	0.0594187	0.00844027	0.100009	0.655772	0.541695	0.725026	0.287572
yfjJ	-1.97892	-0.58371	0.170842	0.284737	0.768788	0.526762	1.25284	-0.441341
nadD	-1.71024	-0.399221	-0.876509	0.957496	0.028307	0.327882	1.43783	0.234455
wbbL_1	-1.44506	-0.447658	-0.597914	0.9913	-0.206142	0.0611856	1.81541	-0.171112
ycaR	-1.81309	-0.736346	-0.485234	1.23977	0.01217	0.599222	1.00312	0.180381
yhdL	-1.42665	-0.718599	-0.911588	1.21897	-0.397802	0.995302	0.946735	0.293638
hipB	-1.83867	-0.408592	-0.832729	1.01704	0.275356	1.09476	0.670624	0.0222063
yheL	-1.53019	-0.535338	-1.23723	0.874865	0.64435	0.949086	0.870939	-0.0364861
rhlE	-1.96054	-0.261621	-0.490073	0.461641	0.240173	1.50015	0.568384	-0.0581103
yaiL	-2.23804	-0.21863	0.00159788	0.133341	0.295562	1.21973	0.515789	0.290646
secA	-2.16642	0.360028	-0.418934	-0.00508949	0.765195	0.966777	0.671745	-0.173296
yiiX	-2.0783	0.232872	-0.692421	0.406365	0.358861	1.11686	0.769873	-0.114113
narP	-1.90503	-0.956681	-0.254424	0.942745	0.294873	0.365575	1.01821	0.494741
bglJ	-1.90956	-0.807777	-0.594661	0.820284	0.446924	0.464819	0.862988	0.716979
yfcO	-1.8608	-0.966532	-0.527401	0.588153	0.565282	0.623604	0.903207	0.674493
yfhG	-2.09239	-0.464975	-0.395576	0.319236	0.749512	0.314031	1.14162	0.428541
ydfH	-1.97507	-0.478295	-0.687792	0.204139	0.437652	0.907265	0.987811	0.604289
yhdZ	-2.08311	-0.655239	-0.11859	0.19765	0.437225	0.83492	1.09845	0.288688
yijO	-1.90895	-0.945294	-0.357655	0.385638	0.457344	0.992515	0.836861	0.539543
cutA	-2.17186	-0.328569	-0.308363	1.14092	0.490672	0.360254	0.600883	0.216061
evgA	-2.12854	-0.701678	0.105283	1.0993	0.157564	0.586337	0.435605	0.446129
ppk	-2.15617	-0.626794	0.1463	0.811832	0.214197	1.03031	0.260583	0.319742
ybaM	-2.00088	-0.398911	-0.565941	1.11448	0.367909	0.987944	0.10471	0.390686
purA	-2.30155	-0.254193	-0.056608	0.264394	0.685842	0.743299	0.214319	0.704502
deoR	-2.20106	-0.622191	-0.0788954	0.686442	0.605184	0.704395	0.358575	0.547547
ygfB	-2.08415	-0.830582	-0.0909524	0.386704	0.858856	0.746511	0.503554	0.510059
yhbJ	-2.16217	-0.454886	-0.363078	0.707399	0.547487	0.885338	0.577365	0.262549
ymjA	-2.17056	-0.591888	0.155665	0.736997	0.949043	0.535732	0.426115	-0.0411065
pdxY	-2.278	0.836263	-0.374695	0.676557	0.0877506	0.140401	0.268516	0.643212
wbbK	-2.11789	1.41611	-0.0156784	0.0877449	0.166229	0.243981	-0.331817	0.551317
glf	-2.02591	1.25442	-0.261399	0.493661	-0.512185	0.71985	-0.129706	0.461263
wbbL_3	-2.1337	1.38919	-0.126379	0.428806	-0.107693	0.52568	-0.109169	0.133264
nudF	-1.69181	1.00928	-1.12396	0.225897	-0.315704	1.211	0.299124	0.386167
wbbH	-2.16425	0.776849	-0.669217	0.335348	0.117551	0.920359	0.171578	0.511779
yeaZ	-1.93863	0.146664	-0.407656	0.347274	-0.243999	1.50343	-0.17141	0.764334
ppx	-2.17304	0.01401	0.652575	0.288313	-0.0641514	1.30884	-0.173283	0.146738
yabP	-1.98827	0.624006	0.651359	0.801805	-0.429111	1.04457	-0.535106	-0.16925
murB	-2.16345	0.61236	-0.0537011	0.00457904	0.595709	1.19849	-0.353429	0.159438
rfaS	-2.20271	0.89217	0.285331	0.0449295	0.0752713	1.09056	-0.260824	0.0752713
yebY	-1.93466	1.05932	0.133605	-0.574041	-0.250317	1.1533	-0.187047	0.59984
entD	-1.9231	-0.133812	0.413525	-0.617403	-0.304168	1.02021	0.322303	1.22244
yfcM	-2.09991	0.0566238	0.276436	-0.14091	0.192521	1.20395	-0.405278	0.916563
yfiC	-1.87427	-0.44253	0.232817	-0.506511	0.285423	1.42285	-0.0515397	0.933758
ttdA	-1.98536	0.65857	-0.0361851	0.233997	-0.866031	0.369089	0.388387	1.23753
ybiX	-1.91892	0.0253641	1.21702	0.286078	-0.627649	0.260252	-0.330043	1.0879
yebZ	-1.97315	0.56149	0.980082	-0.0168396	-0.737588	0.480659	-0.28243	0.987781
yobA	-1.8571	0.826751	0.946998	0.630476	-0.811332	-0.0588147	-0.494034	0.817053
ygaZ	-2.36657	0.417332	0.906782	0.175777	-0.122204	0.213817	0.313355	0.461713
yjiQ	-2.27316	-0.083957	0.548354	0.511821	-0.303158	0.596129	0.107142	0.896827
yraQ	-2.35854	-0.0649429	0.393957	0.162244	0.116083	0.662779	0.222888	0.865528
mmuP	0.224075	-1.61195	1.10349	-1.13545	-0.272931	-0.155918	1.06006	0.788635
lpcA	-0.392918	-1.98438	0.875408	-0.24625	-0.28769	0.0377723	0.982032	1.01602
recD	-0.169614	-1.85868	1.15899	-0.630097	-0.0695914	-0.271524	0.964607	0.875909
lexA	0.0139898	-1.38412	0.871051	-1.29255	-0.181721	-0.0566335	0.48681	1.54317
astC	-0.794295	-1.04599	1.04052	-0.757817	-0.323737	-0.3821	0.497004	1.76642
yadM	-0.654808	-0.873991	1.38359	-1.07126	-0.347952	-0.347952	0.375351	1.53702
idnT	-0.550711	-2.02243	1.33271	-0.257314	0.263229	0.476179	0.078673	0.679664
macA	-0.397606	-1.87915	0.544868	-0.565396	0.16288	1.58373	0.33781	0.21286
metR	0.180658	-2.22312	0.67117	-0.603089	0.13402	0.789108	0.431544	0.619707
lolE	-1.47542	-1.574	0.522551	0.249258	0.384928	1.04278	-0.0298911	0.879785
yhfA	-1.5296	-1.42205	0.581464	0.0117298	0.181127	1.33918	0.171682	0.666467
ribB	-1.39332	-1.31738	0.617776	-0.53085	0.058251	0.849579	0.377179	1.33876
ybdG	-1.32113	-1.46884	0.88286	-0.0966923	-0.475685	0.904239	0.678787	0.896464
yjiY	-1.54149	-1.53862	0.443313	0.171726	0.216474	0.436577	0.630977	1.18104
yhbS	-0.559541	-1.80338	0.499624	-0.6383	0.577704	0.544435	-0.0835961	1.46306
cdsA	-0.413918	-1.93235	0.0290917	-0.182782	0.261835	0.878197	-0.124998	1.48493
ygjR	-0.714922	-1.93777	0.0665043	0.412327	0.155454	0.722403	-0.118045	1.41405
cycA	-0.854388	-1.88398	0.329987	-0.173514	0.125875	1.00596	0.223789	1.22627
ymgB	-0.932768	-1.74434	0.39591	-0.00628427	-0.394115	0.826833	0.496459	1.3583
insC_4	-0.191061	-1.13328	-0.728474	0.520837	-1.02859	0.695322	0.0392591	1.82598
recC	0.677729	-1.5627	-0.654305	-0.295838	-0.809099	0.995463	0.286673	1.36208
iscA	0.951517	-1.9526	-0.521318	-0.494942	0.00925345	0.273139	0.562904	1.17204
gabD	0.528877	-2.02788	-0.711694	-0.134094	0.304472	0.137143	0.667911	1.23527
ubiA	0.162746	-1.92624	-0.639646	-0.0601413	0.218083	-0.0432326	0.842165	1.44626
ydcU	0.557266	-1.75369	0.0121563	-0.535513	-0.499684	0.175945	0.329497	1.71403
aqpZ	-0.209174	-1.76273	-0.138834	-0.583451	0.178129	-0.0155226	0.910184	1.6214
yheT	0.094965	-1.84512	0.279531	-1.01028	0.0262895	0.657246	0.429759	1.36761
mmuM	-0.102168	-1.61455	0.016158	-0.971213	0.0579198	0.398975	0.465595	1.74928
yheU	-0.304871	-1.55712	-0.0286731	-0.684057	-0.379772	0.540107	0.631392	1.783
yegT	-0.125944	-1.04327	-0.682351	-1.17861	0.0244367	0.250008	1.0771	1.67862
yhbT	-0.382861	-1.22241	-0.677354	-1.05808	0.322457	0.575461	0.795925	1.64686
yigP	0.229929	-1.68277	-0.558794	-0.999123	0.270022	0.711043	0.72625	1.30345
ytjC	0.15814	-1.45976	-0.666424	-0.559239	-0.479905	0.349722	1.00971	1.64776
ispA	-0.36297	-0.546218	-0.882507	0.128375	-0.948959	2.02529	-0.254231	0.841225
ybbC	-0.890226	0.161222	0.18926	-0.301415	-1.57717	1.59119	-0.175241	1.00238
yfeX	-1.4346	-0.427001	0.520278	-0.000278262	-0.826914	1.34244	-0.498495	1.32457
cmtA	-0.823697	-0.44715	-0.412918	-0.464265	-0.652539	1.28154	-0.361571	1.8806
alsE	-1.16356	-0.264524	-0.748621	-0.306018	-0.550372	0.860424	0.214962	1.95771
rpiR	-1.45445	-0.116148	-0.0283146	-0.557626	-0.640837	1.01182	0.0179137	1.76765
chbB	-1.28621	-0.727982	-0.611338	0.207945	-0.472477	1.54657	0.00798472	1.3355
ypdI	-1.42501	-0.0526667	-0.6004	0.176057	-0.835143	1.25347	-0.0346097	1.51831
yghS	0.250177	-0.224735	0.190813	-0.521556	-1.1576	-1.23392	1.14912	1.54771
mhpC	0.105937	0.00787982	-0.559455	-1.28088	0.00787982	-0.594475	0.154967	2.15815
ddpX	0.327175	-0.312132	-0.214356	-1.16956	-0.846142	-0.522727	0.801014	1.93672
rspB	0.118814	-0.708314	-0.173651	-1.13787	-0.767722	-0.187361	0.950512	1.90559
bglB	-0.481219	-0.313352	-0.134294	-0.369308	-0.346925	-1.07435	0.481219	2.23823
yjhB	-0.295771	-0.195792	0.415191	-1.01784	-0.106922	-1.29556	0.592931	1.90377
ygcP	-1.23594	-0.426435	0.710725	-0.869735	-0.966104	0.479438	0.836006	1.47204
ybcC	-1.04634	-1.30651	0.093322	-0.458127	-0.48075	0.828587	0.828587	1.54123
ulaC	-1.01449	-0.890263	0.00887326	-0.363795	-0.890263	0.257318	1.4049	1.48772
rhaS	-0.793418	-0.885599	-0.314953	-0.692457	-0.784639	0.778054	1.06338	1.62963
ycjM	-0.913454	-1.0317	-0.03843	-0.440468	-0.795208	0.458205	1.02579	1.73527
ygeF	-0.808054	-0.217695	-0.394803	-0.778536	-1.16227	0.608808	1.2582	1.49435
yjhR	-0.974118	-0.452709	0.125068	-0.593631	-1.25596	0.449186	1.5061	1.19607
sufI	-0.653879	-0.970787	0.586313	-1.3755	0.173373	-0.308161	1.17074	1.3779
yegJ	-0.599479	-0.800447	-0.0239792	-1.312	0.597195	-0.425915	0.807298	1.75733
astA	-0.208809	-0.935304	-0.107008	-1.28698	0.179888	-0.509588	1.36449	1.50331
yhbU	-0.304976	-1.03449	-0.54004	-0.726471	0.181364	-0.572463	1.21078	1.78629
yhcE_3	-0.509231	-0.509231	-0.509231	-0.509231	-0.509231	-0.509231	0.904634	2.15075
fimZ	-0.85997	-0.479961	-0.274122	-0.139535	-0.764968	-0.313706	0.628402	2.20386
yjfI	-0.817693	-0.577288	-0.260966	-0.00790799	-0.89361	-0.450759	1.05493	1.95329
ycfK	-1.04095	-0.779837	-0.276265	-0.0804316	-0.155035	-0.686583	1.2158	1.8033
ycjZ	-1.36613	-0.337402	-0.0153229	-0.152327	-0.169152	-0.861382	1.36193	1.53979
ybcL	-1.12668	-0.835771	-0.0287387	0.130791	-0.202344	-0.835771	1.64163	1.25688
ydhY	-1.22052	-0.614048	0.295653	-0.0560983	-0.57766	-0.686824	1.70266	1.15684
ompN	-0.69351	-0.854749	0.376529	-0.664194	-0.634878	-0.502955	1.23403	1.73973
frwB	-0.962025	-0.322513	-0.0248086	-0.724964	-0.476878	-0.587138	1.73936	1.35896
ydcC	-0.539737	-0.652052	-0.340066	-0.627094	-0.689491	-0.365025	1.64417	1.56929
ykfJ	-0.477787	-0.572697	-0.27071	-0.840172	-0.400133	-0.633095	1.57573	1.61887
yfbN	-0.632241	0.516446	-1.18806	-1.22511	0.5535	-0.0578974	0.294119	1.73924
yecI	-0.840139	0.788439	-0.765819	-1.07926	-0.589713	0.363522	0.290817	1.83215
araG	-0.913735	0.656945	-0.743309	-1.20852	0.0811827	0.0351216	0.173304	1.91901
ygcW	-0.904156	0.648531	-0.260359	-1.39647	-0.108877	0.307697	-0.184618	1.89826
lpxB	-1.6358	0.55453	-0.0293616	-1.25791	0.161071	0.327791	0.423377	1.4563
topB	-1.33234	0.420757	-0.973251	-0.711966	0.394482	0.146335	0.220778	1.8352
yigZ	-1.90506	0.181376	-0.589172	-0.175746	0.469327	0.187811	0.199072	1.63239
fixX	-1.01234	0.37257	0.171859	0.222037	-0.44031	-0.871839	-0.560737	2.11876
aphA	-1.04228	0.34228	0.259927	-0.609928	-0.78836	-0.244486	-0.078064	2.16091
fucR	-0.71365	0.2663	0.31927	-0.768275	-0.615986	-0.879182	0.26961	2.12191
lacA	-0.828556	-0.848342	0.368522	0.200338	-0.442721	-0.581226	-0.0766722	2.20866
pps	-1.25812	-0.333358	0.491182	-0.408107	-0.648537	0.0678462	-0.0256952	2.11479
yjiA	-0.857939	-0.633424	0.275163	-0.445743	-0.533444	-0.0931826	-0.0124975	2.30107
ddpA	-0.50882	-0.560184	-1.06526	-0.406093	-0.590146	0.0604593	1.35739	1.71265
ybbW	-0.395796	-0.469863	-1.19202	-0.414312	-0.506896	0.196741	0.733727	2.04842
rmuC	-0.574096	0.290711	-1.05581	-0.778505	-0.719898	0.157774	0.735264	1.94456
ygfS	-0.426193	0.00291069	-1.02162	-1.01496	-0.313096	-0.00706869	0.764653	2.01537
yihT	0.137782	-0.190775	-0.890284	-0.667713	-1.19764	0.551128	0.286163	1.97134
yjaA	-0.747384	-0.373988	-0.950625	-0.137661	-1.11605	0.930537	0.750929	1.64424
yaaI	-1.36871	-0.347497	-0.0277223	-0.53833	0.307525	-0.667272	0.735611	1.9064
sdaC	-1.29901	0.337495	-0.276863	-0.666288	-0.198825	-0.321237	0.319133	2.10559
ydjF	-1.22904	-0.019484	-0.474628	-0.568151	0.134309	-0.482941	0.543731	2.09621
smtA	-1.22635	-0.477379	0.348245	-0.845618	-0.42989	-0.0683159	0.802295	1.89702
yfcP	-1.04838	-0.139505	-0.179602	-1.12857	-0.092725	-0.239748	0.909707	1.91882
dcuS	-1.32798	-0.00538752	-0.385194	-0.670723	-0.673417	0.247818	1.12326	1.69162
ydeN	-1.14542	-0.66531	-0.485268	-0.383995	-0.507774	0.392434	0.876296	1.91904
ygfM	-1.10121	-0.383656	-0.572211	-0.357468	-0.776478	0.312948	1.02527	1.85281
dcuR	-1.41171	-0.482499	-0.665388	-0.326872	0.217252	0.199077	0.497834	1.97231
pspE	-1.34237	-0.397781	-0.622203	-0.277249	-0.14663	0.287084	0.428293	2.07086
sdaB	-1.33311	-0.426115	-0.619329	-0.69686	0.132603	0.168293	1.01499	1.75953
torY	-1.37007	-0.548343	-0.244937	-0.763255	0.0331851	0.0837526	1.06982	1.73984
ygiS	-1.62063	-0.469664	-0.381902	-0.498918	0.0569081	0.296426	0.961955	1.65582
yncI	-1.4339	-0.354896	-0.96372	-0.288589	0.21776	0.181592	0.977283	1.66447
garL	-0.304434	-0.997943	-1.03071	-0.0969274	0.159725	-0.031399	0.110579	2.19111
ybhQ	0.157253	-0.534317	-1.12208	-0.354893	-0.0874777	-0.189219	-0.157597	2.28833
rbsA	-0.640943	0.0561042	-0.938558	-0.477074	-0.323446	-0.0192034	0.0253786	2.31774
rbsK	-0.87356	0.258194	-0.762303	-0.5935	-0.214458	-0.0993642	0.00882404	2.27617
mglB	-0.281488	0.331194	-0.620966	-0.684857	-0.489371	-0.387337	-0.216644	2.34947
rbsD	-0.292878	0.448088	-0.92427	-0.537851	-0.53961	-0.285624	-0.14308	2.27522
tdcB	-0.370518	0.0071529	-0.450631	-0.59941	-0.32474	-0.47352	-0.221739	2.43341
gatR_3	-0.637266	-0.418055	-0.586446	-0.580799	0.177668	0.291005	-0.551961	2.30585
tdcA	-0.663945	-0.495101	-0.0167086	-0.628769	-0.213694	-0.298116	-0.0870603	2.40339
yeeI	-0.720358	-0.539158	-0.275549	-0.492535	-0.162645	-0.0318486	-0.188099	2.41019
tnaB_2	-0.522467	-0.450803	-0.517625	-0.432403	-0.355897	-0.128317	-0.0266318	2.43414
xylF	-0.541972	-0.412546	-0.333966	-0.468014	-0.491126	-0.269253	0.0912916	2.42559
tnaA	-0.416643	-0.409879	-0.435771	-0.424924	-0.357977	-0.187109	-0.231663	2.46397
yfaS_1	-0.353553	-0.353553	-0.353553	-0.353553	-0.353553	-0.353553	-0.353553	2.47487
ypdJ	-0.700314	-0.303375	-0.235328	-0.700314	-0.700314	0.411115	-0.0538703	2.2824
ygjJ	-0.529085	-1.22297	-0.445819	-0.445819	-0.515207	0.872556	0.372962	1.91338
agp	-0.453054	-1.50732	-0.249818	-0.213158	-0.0394637	0.12284	0.258806	2.08117
aldB	-0.449455	-1.22903	-0.502103	-0.0871612	-0.0723418	0.0661021	0.0341235	2.23987
cspD	-1.11486	-1.07134	-0.36163	0.145983	-0.00375413	0.238323	0.0707625	2.09652
yidI	-1.1088	-0.710508	-0.551868	-0.17383	0.109698	0.231211	-0.00168771	2.20578
yijD	-1.07328	-1.28409	0.120064	-0.293863	-0.275148	0.300606	0.62316	1.88255
yqeB	-1.01981	-0.898786	-0.0733148	-0.222272	-0.312267	-0.00193963	0.314594	2.2138
frwC	-0.95866	-0.688509	-0.748543	-0.643484	0.219498	0.309548	0.437119	2.07303
gatA_1	-0.953416	-0.651118	-0.566101	-0.580806	-0.0243428	0.415042	0.167989	2.19275
gatA_2	-0.995171	-0.662859	-0.573023	-0.551289	-0.0815407	0.481654	0.226276	2.15595
gatD	-0.849726	-0.780066	-0.651759	-0.581402	0.0119045	0.425189	0.268652	2.15721
gatZ	-1.03207	-0.751333	-0.64934	-0.494473	-0.0434455	0.484989	0.412833	2.07284
gatB	-0.871251	-0.612719	-0.560274	-0.560091	-0.176837	0.311946	0.219535	2.24969
gatC	-0.819853	-0.566073	-0.565844	-0.604904	-0.181202	0.242727	0.218819	2.27633
lsrG	-0.813531	-0.69941	-0.584954	-0.623889	-0.0307959	0.173279	0.351509	2.22779
ego	-0.701946	-0.727346	-0.651917	-0.555707	-0.233212	0.157014	0.494903	2.21821
lsrC	-0.689382	-0.935466	-0.580232	-0.46612	-0.215075	0.265185	0.431887	2.1892
ydeV	-0.703808	-0.899123	-0.63107	-0.63107	-0.123924	0.350894	0.518596	2.11951
ydeW	-0.659331	-0.875854	-0.646654	-0.726773	-0.058948	0.334546	0.51963	2.11338
lsrD	-0.787922	-0.876843	-0.707768	-0.498616	-0.134164	0.315451	0.594738	2.09512
ychH	-0.8359	-0.834183	-0.758311	-0.501559	-0.0270287	0.361675	0.49782	2.09749
ygeV	-0.921812	-0.812325	-0.700125	-0.427766	-0.17079	0.39112	0.563945	2.07775
ppdC	-0.381726	-0.45891	-0.633414	-0.683751	-0.522671	0.0612439	0.292797	2.32643
hokB	-0.712189	-0.815551	-0.602386	-0.26688	-0.22079	0.241802	0.0781153	2.29788
lsrF	-0.616692	-0.672983	-0.429427	-0.602201	-0.361989	0.087223	0.270587	2.32548
lsrB	-0.666673	-0.689082	-0.634304	-0.47661	-0.187781	0.0454409	0.301901	2.30711
mokB	-0.690536	-0.668934	-0.541561	-0.416314	-0.204547	-0.115341	0.299686	2.33755
yghW	-0.528439	-0.577451	-0.593788	-0.445462	-0.369794	-0.104097	0.246726	2.3723
yqeC	-0.645787	-0.753163	-0.458647	-0.385018	-0.415697	-0.108909	0.477054	2.29017
lldP	-0.31985	-0.340756	-0.999538	-0.976687	0.0277734	0.279618	0.15564	2.1738
lldR	-0.39411	-0.550744	-1.11098	-0.979328	0.243961	0.446722	0.353509	1.99097
dctA	-0.700146	-0.221469	-0.924585	-0.79558	-0.153948	0.254003	0.361319	2.18041
yjjM	-0.597644	-0.493065	-0.828255	-0.702224	0.000335158	-0.0130724	0.381111	2.25281
ytfQ	-0.602827	-0.542129	-0.937612	-0.749829	-0.0176639	0.0620017	0.683203	2.10485
ampH	-0.143948	-1.16334	-1.24408	-0.450032	0.132858	0.766318	0.322719	1.7795
yabI	0.345905	-1.36735	-1.49545	-0.486245	0.410477	0.720841	0.714592	1.15722
frvX	-0.928082	-0.939665	-0.499514	-0.88175	0.166505	1.37113	0.201253	1.51012
garP	-0.643261	-0.557254	-0.98729	-0.858279	-0.370905	1.17722	0.603841	1.63593
mhpA	-0.100513	-0.626837	-1.31398	-1.0362	0.820554	0.27961	0.250369	1.727
yfdM	-0.638601	-0.503651	-0.802468	-1.00489	0.65306	0.228932	0.0168686	2.05075
hcaT	-0.771376	-0.407013	-1.24737	-0.876684	0.441764	0.991469	0.23115	1.63806
znuA	-0.21845	-0.784708	-1.26927	-1.00633	0.506509	1.09249	0.187226	1.49253
xerC	0.490934	0.336786	-0.793599	-0.494947	-0.915631	0.368902	1.96814	-0.960589
grxA	0.825824	-0.944199	-0.873118	-0.691218	0.16315	-0.310908	2.00789	-0.177422
rsmC	0.906839	-0.912533	-0.615412	-0.920457	0.549303	-0.454967	1.85565	-0.408418
ssuD	0.502202	-0.517193	-1.11684	-1.11684	0.727069	-0.367282	1.82142	0.06746
lepB	0.398841	0.372642	-0.955908	-1.0738	0.465717	-0.180978	1.88527	-0.911784
agaB	-0.0771851	-0.306946	-0.407466	-0.220786	0.166935	-0.436186	2.32094	-1.03931
yaiX	-0.0602099	-0.202524	-0.290102	-0.169683	0.662309	-1.05641	2.08545	-0.968832
kefG	0.562165	-0.190217	-1.01237	-0.146846	-0.018621	-0.508894	2.15367	-0.838886
yeeL_1	0.38651	-0.507408	-0.507408	-0.507408	-0.507408	-0.199666	2.3502	-0.507408
yjfJ	0.826475	-0.354204	-0.369946	-0.85796	-0.0550983	-0.826475	2.10161	-0.4644
ybbV	-1.32004	0.48294	-0.289764	-1.32004	-0.135223	0.0708313	1.35867	1.15262
yajR	-0.660715	0.32688	-0.421466	-1.67891	0.0292103	-0.207256	1.35342	1.25884
yegV	-0.605612	0.290362	-0.269622	-1.53062	0.136885	-0.701016	1.21122	1.4684
ydfZ	-1.05064	0.419433	-1.30774	0.201888	-0.659502	-0.165081	0.944617	1.61703
yffH	-1.12965	0.591375	-0.849528	-0.324065	-0.844036	-0.119008	0.988675	1.68624
alsC	-1.0051	-0.157599	-1.08358	-0.251766	-0.61274	0.18768	1.61065	1.31245
yihL	-1.09031	0.112791	-1.20757	0.117889	-0.820125	0.204553	1.25982	1.42295
ybiR	-1.07982	-0.0304176	-1.48951	-0.631165	0.179654	0.786105	1.11975	1.14541
yehU	-0.955362	0.0603779	-1.2416	-0.87784	-0.164238	0.748139	0.875355	1.55517
yghO	-0.817298	0.442664	-1.17516	-1.04096	0.524674	-0.437073	1.44169	1.06146
yjgW	-1.06589	0.122925	-0.991591	-0.947884	0.568731	-0.335994	1.42538	1.22433
frvR	-1.30152	0.343221	-1.26074	-0.146124	0.0985486	-0.282053	1.62095	0.927716
ulaF	-0.779821	-0.0819473	-1.24507	-0.636017	-0.141161	-0.0607996	1.66062	1.28419
ygbK	-1.00018	0.148496	-1.39771	-0.251345	-0.158896	-0.135784	1.32722	1.4682
yaiV	-1.17759	0.233611	-0.948746	-0.936033	0.0556216	0.0683351	1.11084	1.59396
yehT	-1.28591	0.283104	-0.849313	-0.611308	-0.247479	-0.0519216	1.00015	1.76267
eutJ	-1.33953	-0.215605	-0.74975	-0.69411	-0.0598131	0.218387	1.2978	1.54262
prpD	-1.13036	-0.24442	-1.06221	-0.705738	0.17496	0.148749	1.33874	1.48028
yebG	-1.45905	-0.22388	-1.05482	-0.317265	0.417173	0.0214793	1.38089	1.23548
ylaC	-1.18749	-0.237249	-1.12381	-0.695758	0.359698	0.235934	1.54086	1.10782
gidA	0.297564	-0.251626	-0.725457	-1.56266	-0.54119	0.155105	1.54769	1.08057
ansP	0.289847	0.0485868	-1.86809	-0.813694	0.124539	-0.116721	1.21915	1.11639
dxs	-0.0713825	0.18293	-1.56528	-1.01249	-0.18255	0.0496824	1.10881	1.49028
sseB	0.196433	0.0877542	-1.07148	-1.38939	-0.422534	-0.107117	1.24574	1.4606
fadA	0.12079	0.185069	-1.35976	-1.16264	-0.0056244	-0.440576	1.40636	1.25638
uhpC	0.0797653	0.086554	-1.45105	-1.3017	0.00848595	0.0831597	1.43069	1.0641
ycbY	-0.0181577	0.0853041	-1.081	-1.43109	-0.133116	-0.0463751	1.70725	0.917181
hemF	0.25347	-1.10481	-0.76363	-1.24321	0.168175	0.0394291	1.47335	1.17723
ygcN	0.0148858	-0.574603	-1.38441	-1.03905	0.604375	-0.0684759	1.61663	0.830643
yagE	-0.448154	-0.396844	-0.978348	-0.961245	-0.103955	-0.14885	1.27926	1.75814
yagF	-0.123678	-0.642457	-1.23344	-0.789534	-0.0728697	-0.0675216	1.21338	1.71612
ccmF	-0.356176	-0.68553	-0.999913	-1.04483	-0.0617536	0.232669	1.41535	1.50018
pepB	-0.378878	-0.852844	-1.12422	-0.70348	-0.123067	0.253918	1.49931	1.42926
prfH	-0.475677	-0.873002	-1.09564	-0.8456	0.301847	0.243619	1.67193	1.07252
ydaL	-0.530451	-1.02057	-1.14575	-0.671493	0.211783	0.487697	1.52083	1.14795
ydcO	-0.509664	-0.574653	-1.30224	-0.751252	0.144458	0.151522	1.60528	1.23655
yfhJ	-0.403216	-0.813956	-1.18748	-0.598938	0.208988	-0.146159	1.5625	1.37826
caiD	-0.082854	-0.478415	-1.49405	-0.499797	-0.189762	-0.125617	1.67044	1.20005
yliL	-0.270648	-0.742272	-1.4079	-0.526826	-0.207408	0.397129	1.61585	1.14208
aslB	-0.169503	-1.12795	-1.18475	-0.119806	-0.694874	1.37821	1.12972	0.788943
ssuA	-0.296796	-0.576851	-1.17349	-0.345502	-0.954315	0.738186	1.63923	0.969535
yeiC	0.368742	-0.26702	-1.46225	-0.394173	-1.23338	1.02994	0.979075	0.979075
yfjQ	0.497857	-1.12605	-1.22007	0.00213665	-0.36538	0.344013	1.93374	-0.0662385
yggP	0.144033	-1.23868	-0.508917	-0.201646	-0.720165	0.451304	2.10288	-0.0288067
cynR	-0.100948	-1.16355	-1.1508	-0.606749	0.154078	0.596122	1.83725	0.434606
rffT	0.144658	-1.08637	-0.999892	-0.966827	0.224777	0.517273	1.85767	0.308711
rhaA	-0.579926	-0.975294	-0.919695	-0.77761	-0.0857148	0.7112	1.69962	0.927418
tolQ	-0.421573	-0.991865	-0.831265	-0.759159	0.051703	0.338815	2.0274	0.585942
glvB	-0.283708	-0.634611	-0.836194	-1.13483	-0.313573	0.649543	1.8889	0.664475
thiC	-0.287438	-0.277936	-1.20914	-1.0381	-0.266058	0.536868	1.86716	0.674648
yegR	-0.318101	-0.387347	-0.889383	-0.820137	-0.837448	0.677316	1.92375	0.651349
yehB	-0.328845	-0.845162	-0.451777	-0.869748	-0.57471	0.851309	2.03146	0.187472
rimI	-0.352664	-0.820586	-1.2963	-0.407185	0.322558	0.600555	1.97257	-0.0189477
ygcI	-0.0409354	-0.528357	-1.36611	-0.383654	-0.178023	0.446485	2.11438	-0.0637838
recF	-0.181897	0.299566	-1.67139	-0.700622	-0.228964	0.411352	1.81848	0.253479
rhsB	-0.221527	-0.148553	-1.58717	-0.158978	-0.523845	0.258014	1.96768	0.414385
yibK	-0.285413	-0.244462	-1.60948	-0.205994	-0.344977	0.380963	1.95942	0.34994
pioO	-0.656601	-0.718966	-1.28592	-0.860703	0.568015	1.29655	1.203	0.454624
nusB	-1.24995	-0.136391	-1.21665	-0.839888	0.624085	1.25476	0.934258	0.629782
rplY	-0.986565	-0.149333	-1.2795	-1.03019	0.515676	1.12001	1.17676	0.633146
insA_3	-0.797535	-0.410368	-0.928488	-0.529934	-0.657471	1.34782	1.64048	0.335497
prmA	-1.00409	-0.584845	-1.15889	-0.440367	-0.21978	1.4688	1.08568	0.853483
citD	-0.943697	-0.603626	-0.75099	-0.932361	-0.138862	1.41413	1.41413	0.54128
ydfR	-0.714767	-0.73706	-0.959989	-0.692474	-0.35808	1.55911	1.24701	0.656248
ygbI	-0.316118	-1.07611	-1.27528	-0.544117	0.0822238	0.941804	1.61007	0.57753
ulaB	-0.587015	-0.955855	-1.33128	-0.0666876	-0.0601011	0.881758	1.74458	0.374603
ygfI	-0.527224	-0.979257	-1.43841	-0.210445	0.270063	1.03532	1.55498	0.294978
rep	-0.898608	-0.560057	-1.5559	-0.274351	0.250818	0.970861	1.38043	0.686807
ymfP	-1.12947	-0.686796	-1.05786	-0.4264	0.172513	1.24665	1.48752	0.39385
bglH	-0.595362	-0.0170105	0.731445	-0.629383	-0.629383	-0.255155	2.16031	-0.765465
ygbF	-1.14687	0.368333	0.507891	-0.0264163	-0.496926	-0.321482	2.02708	-0.911613
ninE	-0.151756	0.501962	-0.0116735	-0.0116735	-0.828822	-0.828822	2.15961	-0.828822
yadC	-0.334335	0.903768	0.10987	0.0342604	-1.02427	-0.967563	1.91504	-0.636773
yafU	-0.527385	0.342698	-0.543802	-0.240094	-0.593052	-0.387844	2.36195	-0.412469
fepE	-0.452253	0.808721	-0.170959	-0.63655	-0.898444	-0.62685	2.11819	-0.14186
yagL	-0.453935	0.73881	-0.592379	-0.230296	-0.762771	-0.890565	2.1126	0.07854
ulaR	-0.414937	0.639038	0.526988	-1.36737	-0.421941	-0.530489	1.92061	-0.351909
essD	-0.59729	0.415482	-0.133289	-1.0256	0.0897888	-0.945291	2.11979	0.076404
yhcA	-0.158381	0.963028	-0.405964	-1.09046	-0.260327	-0.624421	2.01162	-0.435092
ydeS	-0.54515	0.243019	-0.229883	-0.413789	-0.440061	-1.35959	1.92445	0.821009
yfdN	-1.08321	1.00094	-0.315365	-0.205673	-0.534749	-1.04665	1.76879	0.415916
ygcG	-0.899858	0.41888	-0.249522	-0.0869373	-0.683079	-0.990183	2.08085	0.409847
pphB	-0.751767	0.854951	-0.132665	-1.23821	-0.324292	-0.928654	1.32665	1.19398
hha	-1.18948	0.723588	-0.158036	-0.602515	-0.726927	-0.686853	1.62669	1.01353
yhhI	-1.26905	0.833945	-0.181292	-0.833945	-0.108775	-0.779557	1.72228	0.616394
ycdR	-1.00501	0.0571205	-0.535699	-0.0663834	-0.943262	-0.375143	1.95908	0.909298
yejE	-1.51608	0.163613	0.089454	0.107994	-0.889442	-0.500108	1.70612	0.838458
ygfG	-1.05673	0.584757	-0.328388	-0.12909	-0.940775	-0.277658	2.11029	0.0375948
yigL	-0.755052	0.0111114	-0.156796	0.0901261	-1.37729	-0.194892	2.09231	0.290486
ygeQ	-1.61209	0.525057	0.320898	-0.6608	-0.287234	-0.321984	1.83254	0.203616
yfiN	-1.62159	-0.174992	0.0775457	-0.345181	-0.0130385	-0.386355	1.94962	0.513997
yjiP	-1.49332	-0.446458	0.093276	-0.406611	-0.0842203	-0.221871	2.00951	0.549695
yehK	-2.0424	0.704479	-0.337439	-0.19536	-0.00591995	0.0414399	1.41488	0.420319
yfeS	-1.86891	0.716503	-0.522934	-0.53794	0.269345	0.0457663	1.47577	0.422399
napD	-1.9673	0.274835	-0.446472	-0.107544	0.17055	-0.142306	1.51757	0.700667
yhcE_1	-1.87923	0.283666	-0.00472038	-0.262208	-0.176379	-0.341171	1.602	0.778041
yfbJ	-1.61582	0.194898	-1.28528	0.0691315	0.154588	0.336789	1.42999	0.715701
yfiR	-1.81065	0.497738	-0.853757	-0.202203	-0.125451	0.388451	1.45296	0.65291
insI_1	-1.57276	-0.0974494	-0.642671	0.0974493	-0.356491	-0.0296051	1.84043	0.761091
yodB	-1.74115	-0.11566	-0.490773	0.321972	-0.259453	-0.0906523	1.78491	0.590803
mrdB	-0.757457	0.686899	-1.21862	-0.964056	-0.172704	0.391756	1.81951	0.214671
dcuD	-1.13577	0.338314	-1.20826	-0.434975	0.177212	-0.0563856	1.94128	0.378589
gyrB	-0.707377	-0.065241	-1.341	-0.644266	0.106564	0.254325	2.01494	0.382052
paaB	-0.906153	0.145197	-1.06725	-0.134598	-0.490701	0.0943247	2.17159	0.18759
yiiE	-0.656388	-0.111462	-0.656388	-0.656388	0.103206	-0.111462	2.36547	-0.276591
yncM	-0.78375	0.171679	-0.78375	-0.78375	-0.0870833	-0.0472738	2.26168	0.05225
ygcL	-1.33204	-0.09636	-0.28908	-0.844568	0.0623506	0.221061	2.08024	0.198389
yneK	-1.06072	-0.033904	-0.324512	-0.789484	0.179208	0.295451	2.19409	-0.460128
yadN	-0.210701	0.0121893	-0.336076	-0.280354	-0.949024	-0.767926	2.28288	0.24901
yigG	0.0970292	-0.312067	-0.20717	-0.626756	-0.878508	-0.700184	2.24741	0.38025
ispF	0.112421	-0.388276	-0.135094	-1.04705	-0.552026	-0.400242	2.28966	0.120608
yigM	-0.0740482	-1.01463	0.0457851	-0.736525	-0.553383	-0.209709	2.22992	0.312585
ybdM	-0.914149	-1.01031	0.404699	0.290215	-0.712658	-0.575279	1.92504	0.592451
sfmC	-0.735233	-0.52454	-0.313846	0.0548682	-0.489424	-0.454308	2.3725	0.0899838
ygfJ	-0.63317	-0.764737	-0.0476936	0.0575611	-0.725267	-0.481867	2.2679	0.327275
kbaY	-0.22618	-0.647393	-0.398225	-0.45755	-0.149056	-0.350764	2.44348	-0.214315
ybcK	-0.672443	-0.427918	-0.486941	-0.309872	-0.0906428	-0.394191	2.42206	-0.0400514
ybhH	-0.397345	-0.505099	-0.585915	-0.451222	0.10102	-0.720608	2.33693	0.222244
ydjE	-0.306198	-0.191732	-0.552301	-0.300475	-0.266135	-0.981551	2.31509	0.283305
ybcO	-0.87619	-0.432191	-0.498318	-0.115723	-0.299936	0.0354254	2.37823	-0.191298
yddK	-0.860616	-0.482323	-0.67147	-0.368835	-0.0662012	0.236433	2.31704	-0.10403
ydjJ	-0.73095	-0.502528	-0.011421	-0.159895	-0.456844	-0.171316	2.40985	-0.376896
ydfQ	-0.367081	-0.315334	-0.57407	-0.645222	-0.632286	0.331505	2.34318	-0.140688
ypjF	-0.380148	-0.501136	-0.55613	0.109301	-0.831102	0.153297	2.33657	-0.330653
ymfM	-0.580397	0.0477474	-0.215394	-1.5311	0.404262	-0.546443	1.87276	0.548566
stfE	-0.608596	-0.325098	-0.47301	-0.805811	0.241898	-0.731855	2.1894	0.513069
maa	-0.548972	-0.185954	-0.847339	-0.920072	0.0729753	-0.452965	2.04743	0.834894
yodA	-0.790731	-0.153804	-0.703878	-1.11643	0.367319	-0.175517	2.03925	0.533789
yphH	-0.692385	-0.599156	-0.0880046	-1.26783	-0.100864	-0.120153	1.88587	0.982519
ydeT	0.116708	-1.01703	-0.816959	-0.216744	-0.400143	-0.533524	2.01739	0.850304
yebE	0.0321567	-0.624487	-0.97689	-0.457683	-0.366058	-0.584548	2.00679	0.970723
rimK	-0.115162	-0.523519	-1.25557	-0.26456	-0.431389	-0.20729	2.07851	0.718982
yjjN	-0.167352	-0.435116	-1.1124	-0.0728474	-0.986393	0.00590649	1.99051	0.777695
treR	0.359093	-0.287521	-0.956347	-0.697208	-0.687336	-0.178929	2.19528	0.252969
spy	0.327496	-0.579065	-1.1754	-0.91764	-0.178249	-0.140774	1.93793	0.725705
ynbB	0.120551	-0.361653	-1.19104	-0.785993	-0.303789	-0.245924	2.03008	0.737773
agaV	-0.42721	-0.383821	-0.637477	-0.520662	-0.740942	-0.0400509	2.28624	0.463923
ygjN	-0.675021	-0.467169	-0.66303	-0.579089	-0.66303	0.244327	2.15097	0.652038
yibD	-0.663863	-0.448217	-1.01491	-0.538487	-0.252631	0.23884	2.15458	0.524696
atoD	-0.964687	-0.167966	-0.411738	-0.827936	-0.619837	0.0104049	1.91302	1.06874
ydbD	-0.939426	-0.609203	-0.233433	-0.552268	-0.563655	-0.119563	2.0098	1.00775
yjjQ	-0.787406	-0.728377	-0.205548	-0.466962	-0.525991	-0.0874895	2.23151	0.570263
agaW	-0.258588	-0.755873	-0.537068	-0.747917	-0.720069	0.0596741	2.0329	0.92694
chbF	-0.439965	-0.5666	-0.547977	-0.473486	-0.447414	-0.521905	2.20448	0.792867
glk	-0.270117	-0.78802	-0.617717	-0.61153	-0.391454	-0.305361	2.14452	0.839676
ypdF	-0.670847	-0.420398	-0.326479	-0.612707	-0.612707	-0.411453	2.11093	0.943658
yqiJ	-0.511744	-0.249139	-0.491544	-0.572346	-0.612747	-0.63968	2.08064	0.996555
dinD	-0.360814	0.185713	-0.620812	-0.891422	-0.451017	-0.711015	2.0906	0.75877
thiS	-0.411143	-0.129143	-0.985397	-1.18536	-0.126579	-0.000961377	1.8628	0.975783
uxuA	-0.0654655	0.105806	-1.06903	-1.09168	-0.173041	-0.378284	2.00961	0.662085
emrE	-0.608302	-0.0816554	-0.828582	-0.793135	-0.777943	0.0829215	1.79959	1.20711
rumB	-0.386939	0.054698	-0.788058	-1.0656	-0.682714	0.164094	2.03801	0.666507
ytfI	-0.339088	-0.026546	-0.819922	-1.00825	-0.631595	-0.122713	1.94087	1.00725
cybC	-0.264475	-0.182741	-2.05334	0.807357	0.28723	0.924385	-0.457665	0.939247
yhdE	-0.969059	-0.727012	-1.46795	0.650393	1.19979	1.20936	-0.100998	0.205479
fhuD	0.360851	-0.15088	-2.03029	-0.0958062	0.392977	0.493948	1.46004	-0.430841
kefB	0.435105	-0.308622	-1.66959	-0.627361	0.308621	0.566649	1.71512	-0.419927
yieL	0.272431	-0.58959	-1.45161	-1.11005	0.776632	1.00434	1.26457	-0.166711
mhpF	-0.694901	-0.735658	-1.66491	-0.173216	1.31033	0.992425	0.53595	0.429983
dedD	-0.180104	-0.185765	-1.85305	-0.628769	1.55512	0.444065	0.677599	0.170904
sfsB	-0.504866	-0.497011	-1.65166	-0.723229	1.09908	0.381153	1.16663	0.729905
acnA	-0.660601	-0.621647	-1.78362	0.0585565	0.732767	0.406482	1.45625	0.411809
cysI	-0.419258	-0.564794	-1.99066	0.0954879	0.877438	0.436043	1.19975	0.365991
cysH	-0.250334	-0.111974	-2.16316	0.0614443	0.751468	0.422208	1.22236	0.0679879
cysJ	-0.211067	-0.380376	-2.12201	0.142456	0.795588	0.312579	1.22485	0.237982
cysP	0.324516	-0.152839	-2.31982	0.230368	0.279095	0.292496	1.10155	0.244638
nrfD	0.141706	-0.554676	-2.20656	0.271265	0.25507	0.546579	1.06482	0.481799
ymgA	-0.387063	-0.584113	-1.76641	0.423658	1.11052	0.479958	1.22312	-0.499663
yfcV	-0.774811	-0.602031	-0.429251	-0.0404954	1.29855	-1.22836	1.62251	0.153882
yahM	-1.66659	-0.170633	-0.28283	-0.0303865	1.32532	-0.909261	0.754991	0.979385
yahL	-1.55709	-0.839179	-0.451119	0.0727612	0.926492	-0.431716	1.23694	1.04291
ycdH	-1.42676	-0.868304	-0.495999	0.150637	1.39002	-0.574379	0.998121	0.826665
ybdO	-1.53205	-0.141515	-0.522989	-0.842935	0.929074	-0.19689	1.35977	0.947533
envY	-1.3511	-0.458551	-0.458551	-0.45428	1.04041	-0.706243	1.4333	0.955003
yhiL	-1.33504	-0.366809	-0.620038	-0.560455	0.661001	-0.351913	1.79308	0.780168
yfaH	-1.25074	-0.445666	-0.829035	0.0463237	2.00789	-0.324266	0.180503	0.614988
frwD	-1.24273	-0.894696	-0.951353	0.45696	1.62785	0.241126	0.902116	-0.13928
yfdO	-1.16158	-0.78229	-1.08031	0.247217	1.52056	0.0575711	1.22254	-0.0237057
yncH	-0.604456	-1.27704	-0.650841	-0.0362383	2.0163	-0.117412	0.705923	-0.0362383
phnD	-0.175874	-0.617739	-0.96658	-0.582855	0.661344	-1.03635	1.59159	1.12647
ybhM	-0.282314	-0.287691	-0.927603	-0.626468	0.889961	-1.27713	1.32015	1.1911
yiaL	-0.717988	-0.347413	-0.58564	-0.479761	0.896657	-1.27385	0.923127	1.58487
yjbL	-0.0880512	-0.990576	-0.990576	-0.0220128	1.34278	-0.990576	0.264154	1.47486
yncJ	0.19947	-1.10217	-1.55899	-0.232324	0.975447	-0.344966	0.856548	1.20699
glcF	-1.12845	0.200408	-1.80841	0.226294	0.914886	-0.1413	0.864838	0.871741
insK	-0.419137	0.271206	-1.66833	-0.139712	0.35339	-0.862928	1.37247	1.09304
yqjI	-1.29367	0.64046	-0.905838	-0.342484	0.779208	-1.0262	1.00321	1.1453
agaC	-0.559456	-1.16914	0.0779428	0.188795	1.86543	-1.16914	0.646059	0.119512
ydfD	-1.09545	-1.11881	1.06623	-0.254143	1.51025	-0.86175	0.51705	0.236616
mrr	-2.05334	-0.489429	0.473197	-0.255124	0.95592	-0.215602	0.933337	0.651042
cedA	-1.82702	-0.964444	0.723098	-0.312496	1.24215	0.389601	0.635335	0.113777
ygeN	-1.9164	-0.827297	0.881752	0.0104721	1.23361	-0.173837	0.395846	0.395846
napH	-1.94478	-0.612389	0.125552	0.965986	0.392032	-0.571392	0.996734	0.648262
napC	-1.45636	-1.5799	0.154744	0.532938	0.991813	-0.0520017	0.923738	0.485034
yjdK	-1.82816	-1.16644	0.237081	0.709135	0.582692	-0.10853	1.05896	0.515255
insD_2	-1.26698	-1.33998	-0.172059	0.234626	1.32955	-0.0782089	-0.0260696	1.31912
yjfC	-0.773932	-1.90964	-0.151123	0.0931161	1.4059	0.221342	0.361779	0.752561
yfgJ	-1.30554	-1.67342	0.843938	0.153722	0.859704	-0.250948	0.598684	0.773865
csgA	-0.964575	-1.88747	0.913437	0.19831	0.939207	-0.263944	0.7717	0.293338
ygjF	-1.03367	-1.93444	0.954655	0.474832	0.783435	-0.144403	0.367904	0.53168
yicN	-0.975379	-1.79147	0.868808	-0.533139	0.85969	0.369578	0.282954	0.918959
yjhX	-1.21244	-1.45382	0.450042	-0.593681	1.028	-0.0531212	0.674425	1.16059
cobS	-0.581032	-1.28358	-1.05321	0.961306	0.708062	0.628004	1.28317	-0.662723
ksgA	-1.14365	-0.891021	-1.03301	1.17573	0.982852	0.519271	0.948923	-0.559101
insE_2	-0.957346	-0.944824	-0.553512	0.776951	0.700254	-0.080806	1.79906	-0.739776
insE_5	-0.834977	-1.15723	-0.768127	0.817407	0.90654	-0.0876329	1.62132	-0.497301
groL	-0.812561	-1.22149	-1.09131	0.494607	1.07895	0.266005	1.46466	-0.178859
tauB	-1.13351	-0.921387	-0.947415	0.596039	0.576518	-0.0338363	1.81024	0.0533572
tauC	-0.997687	-1.13347	-0.940985	0.657104	0.504905	0.024434	1.77025	0.115455
ygiZ	-0.991194	-0.856795	-0.991194	0.322931	0.606663	0.681329	1.75652	-0.528264
yqjB	-1.14126	-0.490724	-0.703183	1.15348	0.642077	-0.530208	1.62259	-0.552769
torI	-0.942978	-0.378548	0.0773379	1.18449	-0.253722	0.0393471	1.62952	-1.35545
yicS	-0.749005	-1.57862	0.221493	1.57393	0.252799	-0.677	0.9478	0.00860922
essQ	-1.07098	-1.3413	0.245341	0.938761	0.456893	0.127812	1.47939	-0.835923
gspC	-1.28909	-1.16723	0.818584	1.07584	0.249919	-0.0705188	1.19318	-0.810686
asnC	-1.32406	-1.07674	-0.442586	1.32036	0.45157	0.305714	1.2654	-0.49966
yzgL	-1.55048	-0.870449	0.0460056	1.33294	0.903963	-0.148985	0.911275	-0.624274
ynbE	-0.403295	-1.93384	0.818267	1.15599	0.49132	-0.48593	-0.34581	0.703296
smf	-0.795864	-1.95179	-0.230367	0.934902	-0.0636766	0.406792	0.761981	0.938017
exoX	-0.83506	-2.01997	0.475839	0.949311	-0.152437	0.279864	0.381968	0.920491
sufE	-0.511619	-2.23764	0.367515	0.947872	0.113161	0.336347	0.283327	0.701041
gntY	-0.602128	-1.87345	-0.651064	1.10441	0.488655	0.0999173	0.394692	1.03897
ypjJ	-0.583172	-1.94714	0.0678107	0.594796	0.780792	-0.257681	-0.00968716	1.35428
garK	0.268263	-2.07294	-0.67393	0.877358	-0.105283	0.863082	0.80598	0.0374734
glnE	0.361936	-2.13994	-0.35259	0.978839	0.0379076	0.8054	0.658963	-0.350513
basS	0.474428	-1.69026	-1.18104	1.00839	0.134263	0.499168	1.06817	-0.313107
yaiY	0.476957	-1.95174	-0.913021	0.623191	0.342783	0.798069	0.941288	-0.317532
yjdP	0.784098	-1.67222	-1.08786	0.709542	-0.394693	0.884849	0.963435	-0.187146
ssuC	-0.406161	-1.39358	-1.26728	0.833851	1.46534	0.144955	0.650145	-0.0272688
cysC	-0.0181548	-1.39488	-1.49834	0.6854	0.992588	0.446426	1.04348	-0.256522
yhbO	-0.182575	-1.54428	-1.29238	0.912802	0.69547	0.861701	0.866811	-0.317544
yjgP	0.140977	-1.45955	-1.17525	1.18833	0.529878	0.991866	0.511774	-0.728017
dsdC	-0.142897	-2.05245	0.0486973	0.680957	0.489362	-0.487765	1.34515	0.118947
uxuR	0.133843	-1.97293	-0.400836	0.14912	0.453262	-0.499439	1.35874	0.778236
argO	0.563581	-2.24148	-0.125438	0.00730887	0.298087	0.0626203	1.22731	0.208009
yjhT	0.776276	-2.33773	0.381459	0.366616	0.283497	-0.328025	0.648628	0.209283
rsuA	-0.800744	-1.84929	0.296951	0.117669	-0.277876	0.807648	1.42414	0.281504
yajL	-1.08902	-1.9008	0.167743	0.186284	0.367182	0.559604	1.1935	0.515507
yfdK	-1.04503	-1.86815	0.134659	0.233282	0.0360355	0.673293	1.23848	0.597429
ygdD	-0.423644	-2.03981	0.258086	-0.284698	0.151642	0.919503	1.27378	0.145142
ynjA	-0.130349	-2.01301	0.298042	-0.209263	-0.395275	1.14637	1.14073	0.162761
lacI	-0.93894	-1.25176	-1.07165	0.930409	0.41283	1.49159	0.373016	0.0545067
truA	-0.582924	-1.6455	-0.927771	1.1572	0.819364	0.958611	0.373118	-0.152097
ycaP	-0.268276	-2.08796	-0.544831	0.987843	0.541636	0.951821	0.145395	0.274377
ygcO	-0.389523	-2.01625	-0.499344	0.640052	0.818512	1.13425	-0.0875139	0.399818
yjgX_3	-0.355334	-1.81965	-1.06528	0.747734	0.669013	1.06069	0.330944	0.431882
ptrB	-0.195484	-2.07518	-0.457945	0.39478	0.430718	0.377355	1.39453	0.13123
yfjP	-0.210609	-2.15773	-0.383047	0.392927	0.730619	0.486331	1.10783	0.0336794
hflX	-0.0145642	-2.04131	-0.421498	0.00695735	0.39707	0.821813	1.3465	-0.0949614
ygcQ	-0.0503097	-1.97489	-0.44547	0.132635	0.147271	0.557067	1.59619	0.0375037
rlpB	-0.383433	-2.04766	-0.587466	1.07553	0.851828	0.483504	0.388042	0.219653
yaeR	-0.0766827	-2.27243	-0.434344	0.737437	0.539076	0.677698	0.459426	0.369819
ftsE	-0.388944	-2.05801	-0.687246	0.596847	0.620218	0.475124	0.980517	0.461491
rimJ	-0.346654	-2.10301	-0.580386	0.572159	0.29947	0.679622	1.01142	0.467381
ybiO	-0.499536	-2.19538	-0.305668	0.568739	0.6257	0.520771	0.754613	0.530765
rpoS	-0.334367	-2.06197	-0.711821	0.956113	0.583722	0.481977	0.705241	0.381104
yciG	-0.433329	-1.9933	-0.692781	0.910401	0.549451	0.494829	0.972971	0.191761
yagR	-0.181175	-2.08333	-0.699674	0.685479	0.733294	0.539044	0.911107	0.0952574
yagS	-0.165894	-2.09554	-0.647893	0.705667	0.76179	0.410195	0.953269	0.0784073
ydiZ	-0.140499	-2.13754	-0.577921	0.759409	0.438951	0.412694	1.04824	0.196668
ligA	0.0301104	-2.0754	-0.856481	0.671356	0.845329	0.553144	0.681393	0.150553
ygaX	-0.041686	-2.00886	-0.843643	0.371203	0.784091	0.907164	0.821807	0.00992517
ybdK	-0.10841	-1.81946	-1.12622	0.300145	0.938513	0.567811	1.03483	0.212789
ydbK	-0.223408	-1.7191	-1.11477	0.386969	0.814308	0.313981	1.34186	0.20015
phnO	0.0554941	-1.8607	-0.941205	0.305546	1.07325	0.660883	0.952172	-0.245446
prlC	0.163976	-1.91579	-0.845199	0.0984298	0.765407	0.600361	1.27029	-0.137477
trmE	-0.0284484	-1.83954	-0.889438	0.435637	0.76262	0.294423	1.39602	-0.131274
yciF	-0.0112735	-1.93071	-0.844195	0.684773	0.680529	0.520311	1.13996	-0.239399
yhjB	-0.313098	-1.95176	-0.686426	0.631671	0.928343	0.498269	1.04383	-0.150825
rbn	-0.243394	-1.76649	-1.19047	1.00229	0.590596	0.336158	0.889206	0.382098
yidB	0.0832931	-1.84774	-1.02365	0.80675	0.81083	0.0492961	1.10456	0.0166582
leuS	-0.710175	-1.85673	-0.592867	0.247515	0.682674	1.32762	0.456819	0.445137
ycgH_3	-0.578166	-1.84958	-0.848525	0.196375	0.89054	0.981877	0.59826	0.609221
ftsA	-0.157284	-2.11399	-0.660511	0.246226	0.489177	1.05958	0.593118	0.543683
sixA	-0.110457	-2.10616	-0.688228	0.161961	0.939302	0.83352	0.532106	0.437959
yfcH	-0.0818703	-2.22171	-0.48629	0.215046	0.902227	0.477633	0.501421	0.693544
ydhC	-0.135479	-2.09993	-0.396761	0.222573	1.08867	0.585464	0.899969	-0.164511
marC	-0.544474	-1.93497	-0.498649	0.272483	1.15547	0.726293	0.878056	-0.0542008
yafV	-0.41195	-2.00194	-0.516218	0.283847	1.11677	0.977615	0.521188	0.0306821
yidH	-0.586514	-2.02898	-0.442749	0.387994	1.15409	0.755605	0.397642	0.362907
mviM	-0.383827	-2.20879	-0.134969	0.270196	0.261969	0.976321	0.852236	0.36686
alkA	-1.12375	-1.75008	-0.33825	0.210793	0.696397	1.08857	0.838271	0.378044
yccU	-0.906408	-1.91518	-0.283002	0.372681	1.00978	0.846195	0.731393	0.144542
xapR	-1.01606	-1.82234	-0.169966	0.361582	0.843359	0.998642	0.879194	-0.0744068
ydhQ	-0.847932	-1.95587	-0.269045	0.420215	0.683426	1.00612	0.84451	0.118576
pspB	-0.767529	-1.95667	-0.161963	-0.0892279	0.484199	1.12529	0.922304	0.443602
dapF	-0.513846	-2.14221	-0.278794	0.149106	0.729407	0.87419	0.752268	0.429878
ftsX	-0.555834	-2.03733	-0.49005	0.149305	0.98112	0.715808	0.75604	0.480944
ygeD	-0.676151	-1.94476	-0.467068	0.0511484	0.724574	0.958028	0.977268	0.376958
pepT	-0.688455	-2.1618	0.113422	0.248961	0.588174	0.505752	1.01677	0.377173
rssA	-0.735686	-2.10326	-0.060521	0.150651	0.640024	0.476032	0.956944	0.675815
ampE	-0.883216	-1.97424	-0.210766	0.153212	0.68462	0.704639	1.01311	0.51264
ypdC	-1.04507	-1.90812	0.0394205	-0.0149528	0.706726	0.730452	0.990454	0.501096
sufD	-0.0107311	-2.42343	0.103845	0.571953	0.421043	0.350743	0.524973	0.461601
sufC	-0.202534	-2.34666	-0.0603326	0.446506	0.399046	0.402807	0.655151	0.706014
sufS	-0.323366	-2.34158	0.0414925	0.563919	0.432927	0.478191	0.666964	0.481449
moaB	-0.0373385	-2.2945	-0.147865	0.444212	0.511185	0.171183	1.06936	0.283763
ompR	-0.273309	-2.32512	0.0714546	0.336577	0.564498	0.416218	0.902451	0.307235
yceH	-0.230438	-2.2951	0.390836	0.291588	0.546351	0.164208	1.05353	0.0790265
gcvR	-0.443248	-2.2706	0.487412	0.739697	0.219715	0.697744	-0.00346047	0.572743
ygiE	-0.00158377	-2.42117	0.488162	0.289856	0.344342	0.705475	0.191654	0.403264
paaY	0.0044488	-2.27957	0.946838	-0.151842	0.510461	0.592475	0.505819	-0.128631
proA	0.614875	-2.35429	0.629351	-0.0316694	-0.0346306	0.517153	0.642842	0.0163697
dacC	0.431095	-2.40403	0.251863	0.146107	0.31919	0.477517	0.787408	-0.00914621
tldD	0.0836972	-2.31113	0.230373	0.159338	0.353371	0.643434	1.00388	-0.162955
rraA	-0.187902	-2.27408	0.496568	0.455826	0.0416724	0.632789	0.959789	-0.124662
ynjB	0.111659	-2.3556	0.533878	0.341438	0.0743194	0.533878	0.858442	-0.0980148
msyB	-0.154957	-1.91667	-0.498128	0.764202	0.631572	0.696193	1.09695	-0.619163
ybhP	0.207427	-2.11847	-0.337428	0.644967	0.792571	0.445401	0.90591	-0.540383
yceK	0.10952	-1.88002	-0.33086	0.779071	0.636684	0.924045	0.732088	-0.970526
yeaQ	-0.339437	-2.24847	0.21502	0.404397	0.654025	0.673371	0.836651	-0.195561
aat	0.218866	-2.25925	0.142365	0.395077	0.701941	0.765548	0.561832	-0.526375
yphA	0.0575343	-2.28533	0.0015721	0.65897	0.597349	0.689152	0.624387	-0.343633
ydhF	-0.507283	-2.07729	0.0562954	0.882376	0.678486	1.08126	0.0132129	-0.127056
elaB	-0.498856	-2.08457	0.260171	1.1876	0.752994	0.492832	0.181203	-0.291369
hinT	-0.636812	-2.11499	0.405217	0.922734	0.791905	0.614168	0.233791	-0.216009
yahK	-0.691113	-1.89063	0.0916673	1.24486	0.92184	0.612363	0.103783	-0.392771
ycfM	-0.628018	-2.13169	0.169217	1.02928	0.549458	0.597783	0.545007	-0.131034
yfgC	-0.683841	-2.01693	-0.0327478	1.06926	0.527038	0.9316	0.379541	-0.173923
chaB	-0.86651	-1.99335	-0.135253	1.16811	0.539754	0.588688	0.423594	0.274965
ydhL	-0.63589	-1.97696	-0.309683	1.38105	0.624164	0.339532	0.367249	0.210542
ybhB	-0.281301	-2.05432	-0.228754	1.37091	0.653132	0.452809	0.302104	-0.214577
ydhS	-0.507026	-2.02909	-0.286013	1.22271	0.690613	0.479608	0.568013	-0.13881
ygaM	-0.654222	-1.90146	-0.138641	1.46141	0.486879	0.532964	0.465499	-0.252428
osmE	-0.11042	-2.03098	0.0885371	1.29054	0.666408	0.477659	0.280558	-0.662305
ycaC	-0.204865	-2.08658	0.0582455	1.12759	0.960728	0.358573	0.250193	-0.463885
ycfL	-0.256606	-2.08114	0.462783	0.721304	0.900885	0.683004	0.283841	-0.71407
yqaA	-0.361664	-1.8194	0.218206	0.755795	1.3105	0.657136	0.120554	-0.881132
fruK	-0.967956	-1.97018	0.224776	1.04312	0.269504	0.315059	0.918052	0.167624
yccT	-0.570242	-2.08609	-0.0881447	1.10511	0.136114	0.354378	0.9552	0.193678
bfr	-0.760565	-1.96907	0.411271	0.691883	0.384592	0.322477	1.24134	-0.32193
yibH	-0.635505	-1.97217	0.11292	1.00315	0.246849	0.320379	1.20273	-0.278362
yeaG	-0.574311	-2.23849	0.454408	0.82102	0.352331	0.440126	0.675333	0.0695843
yhdH	-0.26354	-2.2852	0.288658	0.984274	0.550185	0.45355	0.371487	-0.0994149
nlpC	-0.609123	-2.13797	1.01363	0.812805	0.44667	0.376837	0.157472	-0.0603155
ybiB	-0.794121	-2.07341	0.681579	0.895606	0.390712	0.334862	0.717937	-0.153164
ydiK	-0.74818	-2.12148	0.706627	0.72541	0.715487	0.312536	0.53687	-0.127274
yeaH	-0.787098	-2.04866	0.70602	1.06002	0.470325	0.453062	0.322326	-0.175994
yhhX	-0.946086	-2.00089	0.783062	0.727221	0.344386	0.709712	0.554496	-0.171897
nrdD	-0.533304	-2.24819	0.148424	0.698454	0.647043	0.27167	0.77522	0.240682
ybjQ	-0.681973	-2.16528	0.0775251	0.669422	0.646534	0.332742	0.903473	0.217562
nfo	-0.896911	-2.08821	0.365815	0.713775	0.752233	0.266921	0.72751	0.158871
ybgL	-0.835866	-2.15818	0.383072	0.554067	0.71128	0.427436	0.658733	0.259455
fruA	-0.904355	-2.09481	0.54957	0.50641	0.498036	0.451655	0.877461	0.116034
ypdB	-0.892903	-2.09812	0.225453	0.572282	0.454276	0.493212	0.936481	0.309315
yddH	-0.475296	-2.21759	0.0561588	0.543782	0.983466	0.364348	0.672537	0.0725956
yqjD	-0.679966	-2.11905	0.138578	0.736551	1.02056	0.402303	0.530397	-0.0293801
yqjE	-0.530867	-2.12645	0.295504	0.633585	1.11298	0.335905	0.537837	-0.258491
dsrB	0.505492	-1.95282	-0.489259	-0.125642	0.543152	1.53531	-0.116552	0.10032
lpxL	0.0913024	-1.78157	-0.407171	-0.499374	0.622911	1.72215	0.218082	0.0336764
murG	-0.173775	-1.27861	-0.875742	-0.265336	0.0604688	2.01758	0.638828	-0.123416
nohB	-0.342611	-1.51615	-1.00421	0.0433187	0.433187	1.73275	0.618276	0.0354426
fsaA	-0.25961	-1.69971	-0.834345	0.360842	0.181237	1.68992	-0.0114296	0.573102
fhuC	-0.114589	-1.91524	-0.837889	-0.0442574	0.414499	1.20014	0.364947	0.932397
yagT	-0.00951889	-1.96347	-0.7989	-0.126533	0.200363	0.974885	0.77429	0.948882
ygdR	0.325654	-2.13958	-0.723672	0.377922	0.0983816	1.05344	0.398223	0.609628
ymfS	-0.1935	-1.68196	-1.12627	0.388654	0.0843461	1.03696	0.2365	1.25527
djlA	-0.60898	-1.86596	-0.0662191	0.521476	0.731958	1.40361	-0.481271	0.365388
ygiH	-0.411177	-1.95143	0.0777748	0.442513	0.236995	1.54237	-0.40666	0.469614
yrbG	-0.924471	-1.3669	0.272939	0.638326	0.398403	1.80492	-0.270738	-0.552482
ycdT	-2.02128	-0.721067	0.730224	0.249512	-0.208308	0.125901	1.05985	0.785162
yeiL	-1.53088	-0.536917	0.616789	0.0488108	-0.838656	-0.235179	1.522	0.954026
napA	-2.04036	-0.201409	0.648011	-0.315249	-0.0525414	0.126975	1.45365	0.380925
dsbC	-1.78796	-0.400062	0.398968	-0.0957748	-0.356281	0.388022	1.78687	0.0662212
yfjL	-1.98505	-0.3547	0.34939	0.458843	-0.402075	0.259542	1.53377	0.140287
fimH	-1.74155	-1.11867	0.138606	0.817061	-0.248406	0.520195	1.24271	0.390061
elbB	-1.68216	-1.40875	0.711228	1.01708	0.140299	0.368918	0.677244	0.176137
ybcM	-1.59705	-1.50043	0.393127	0.857553	0.0596119	0.218577	0.899632	0.668978
cbrA	-1.35809	-1.43603	0.878764	0.340984	-0.446202	0.738474	1.20611	0.0759906
yihS	-1.57998	-1.38072	0.498985	0.57869	-0.271494	0.977214	0.970572	0.206734
fimG	-1.80326	-1.05691	0.0289848	0.526901	-0.284671	0.904737	0.710125	0.974094
intD	-1.50546	-1.21236	-0.026057	0.459077	-0.492241	0.611946	0.86841	1.29669
yfbK	-1.48034	-1.37456	-0.0567453	0.551478	-0.316783	0.608774	1.00103	1.06714
fimI	-1.54196	-0.923126	-0.273105	0.232858	-0.527239	0.566242	1.25965	1.20668
yhgN	-1.40764	-1.07007	-0.0705471	0.435808	-0.632285	0.211641	1.37995	1.15315
fimA	-1.81056	-0.81088	0.444697	0.520743	-0.689974	0.357921	0.907301	1.08076
fimD	-1.86398	-0.641655	0.29563	0.766413	-0.749507	0.39321	1.12678	0.673112
fimF	-1.82594	-0.754263	0.245324	0.457292	-0.647741	0.576726	1.27181	0.676792
fimC	-1.86198	-0.479403	-0.155084	0.482019	-0.680057	0.576444	1.12583	0.992238
yjeT	-1.65067	-0.778242	-0.0406469	0.371772	-0.809966	0.911088	1.15695	0.839708
yhaB	-1.42338	-0.711689	-0.307757	0.29814	-0.375079	0.201966	2.00042	0.317375
yjhF	-1.22425	-1.09785	0.139326	0.575979	-0.730148	0.422767	1.79401	0.120175
dsdX	-1.04634	-1.43047	-0.244305	0.308679	-0.303402	0.106059	1.61726	0.992521
ybfD	-0.934422	-1.25064	-0.301988	0.368393	-0.403177	-0.0616623	1.93683	0.646665
djlB	-1.61421	-0.915227	-0.487102	0.482733	-0.102663	0.264302	1.49625	0.87591
phoP	-1.63104	-1.002	-0.561354	0.67145	0.233728	0.372628	1.47771	0.438886
ybdF	-1.51797	-1.27806	-0.210907	0.78414	0.0919337	0.0591588	1.38589	0.685815
yfbM	-1.38279	-1.42684	-0.0613025	0.537772	-0.117099	0.349828	1.50686	0.593569
ybcY	-1.16768	-1.51173	0.0299405	0.487214	0.103975	0.103975	1.74581	0.208495
allA	-1.26833	-1.53125	-0.332331	0.729865	0.246093	0.206129	1.42187	0.527943
rtcB	-0.982136	-1.65657	-0.491818	0.580876	0.350727	0.100565	1.48346	0.614898
ylaB	-1.16704	-1.4846	-0.443263	0.421431	0.383721	0.274559	1.64272	0.372473
guaD	-1.50615	-1.08017	-0.136923	0.775896	-0.661793	1.2323	0.829143	0.54769
rfaH	-1.46121	-0.981605	0.240301	0.789563	-0.710955	1.11991	1.19355	-0.189554
ydiN	-1.39222	-1.06782	-0.0946171	0.770453	-0.599241	1.38321	1.02277	-0.0225279
idnK	-1.03851	-1.42906	0.479313	0.186399	-0.576951	1.65097	0.745598	-0.0177524
yidG	-1.1781	-1.16632	-0.240333	0.153153	-0.101317	1.91324	0.702149	-0.0824671
insE_3	-0.852764	-0.851258	-0.260651	0.531848	-0.571021	0.528834	2.0611	-0.586087
insN_1	-0.937728	-0.820512	-0.807488	0.701125	-0.0694616	0.273504	2.02306	-0.362501
pabB	-0.308631	-1.08412	-1.18668	0.902127	-0.213571	0.454347	1.77267	-0.336147
srlR	-0.850202	-1.33672	-0.503377	0.301063	-0.233626	1.4716	1.37044	-0.219173
ybaX	-1.49858	-1.19906	-0.31304	0.354324	-0.0567999	1.09913	1.34512	0.26891
fsaB	-0.60966	-1.17411	-0.472658	0.00959018	-0.516498	0.574039	2.10298	0.0863114
hyfJ	-0.624646	-1.31341	-0.610236	0.0381849	-0.555481	1.22263	1.63186	0.211097
yiaY	-0.792654	-1.42276	-0.32343	-0.175959	-0.269804	1.03062	1.74116	0.212827
ydiT	-1.06642	-0.754138	-1.07307	0.362119	-0.388697	0.820582	1.7508	0.34883
ppdA	-1.0161	-0.763698	-0.600379	0.082587	-0.615226	1.30747	1.70834	-0.103002
insA_2	-0.981061	-0.652797	-0.731329	-0.107785	-0.322963	0.743502	2.09896	-0.0465302
yqgD	-0.991307	-0.937803	-0.765402	-0.0163483	-0.0341831	0.988335	1.88601	-0.129301
yfbL	-1.01857	-0.811404	-1.60061	0.875528	1.04323	0.224431	0.579574	0.707821
yjiW	-0.568621	-0.940326	-1.50673	0.927051	0.502245	-0.462419	1.24566	0.803149
insC_10	-0.729652	-0.866768	-0.827592	1.05285	-0.834121	-0.285658	1.39238	1.09856
eaeH	-1.06659	-0.822796	-0.952818	1.06252	-0.270202	-0.335213	1.43634	0.948755
ybfQ	-1.00731	-0.919057	-0.532956	0.950772	-0.262686	-0.643271	1.734	0.680502
glxK	0.0505445	-1.49515	-1.46254	0.885349	-0.249463	0.794042	0.572297	0.904914
insC_1	-0.951162	-1.09251	-1.2103	1.11018	-0.32687	0.839261	0.992389	0.639016
ymdA	-0.617014	-1.27792	-1.32861	1.2981	-0.121337	0.93573	0.436298	0.674749
lacY	-0.587208	-1.01764	-1.01022	0.125234	-0.461046	0.0435999	1.18648	1.72081
rspA	-0.490914	-1.11478	-1.06876	0.368186	-0.506255	-0.00511384	1.32956	1.48808
kdgT	-1.3093	-0.528954	-1.01112	0.206982	-0.34497	0.251392	1.27916	1.4568
uspF	-1.22974	-0.626986	-1.22845	0.424114	0.0152183	0.093473	1.01215	1.54021
yjfL	-0.673469	-0.636312	-1.64884	0.42266	-0.162562	0.190429	1.11935	1.38874
ptr	-0.29121	-1.25647	-0.864559	0.0898125	-0.955279	0.859115	1.15668	1.26191
rhaT	-0.414851	-1.51231	-0.639631	0.0567459	-0.569112	0.581232	0.832457	1.66547
frlC	-1.22992	-1.18387	-0.53917	0.325548	-0.50847	0.883266	0.888383	1.36423
insC_5	-0.848209	-1.26494	-0.87966	0.519933	-0.565145	0.653602	1.03888	1.34554
ycjP	-1.07484	-1.17643	-0.613039	0.439864	-0.594567	0.458336	1.12333	1.43735
ppdB	-1.05802	-1.24264	-0.847832	0.506995	-0.0866295	0.904639	0.251368	1.57211
insC_7	-1.14265	-0.87571	-1.18078	0.202925	-0.172963	1.1944	0.780376	1.1944
ypjL	-0.838394	-1.45099	-0.885517	0.292554	-0.0715767	1.48205	0.599567	0.872308
sgbU	-0.221944	-0.864628	-0.472482	-1.31124	0.562349	-0.0694425	1.93486	0.442526
yhfX	-0.23288	-1.26492	-0.393717	-1.19791	1.06723	-0.139058	1.44251	0.718744
sspB	-0.00300043	-2.10997	0.10092	-0.462439	0.96662	0.216083	1.15015	0.141637
ygaD	0.182556	-1.72506	-0.0851046	-1.11538	1.33392	0.0774034	0.849583	0.482081
yfbF	0.663707	-1.78883	-0.710517	-0.595163	0.643645	-0.0702158	1.35082	0.506557
yfdV	0.534387	-1.68361	-1.08601	-0.591848	0.683785	0.362004	1.17795	0.60334
yidE	0.382545	-1.99367	-0.155259	-0.663794	0.570959	-0.0967224	1.26608	0.689861
mraY	0.989865	-1.7587	-0.428944	-0.975337	0.329515	0.891755	0.942319	0.00952757
murE	1.08802	-1.76881	-0.870711	-0.439625	0.328909	0.867767	0.926069	-0.131622
mraW	0.0378036	-1.80277	-0.686294	-0.627705	0.322079	1.02513	1.20461	0.527137
ftsW	0.413465	-1.79887	-0.589736	-0.601503	0.379142	1.29605	1.02245	-0.120987
murD	0.290409	-1.84761	-0.683531	-0.341154	0.338708	1.25518	1.10233	-0.11433
ycdC	0.589528	-1.88251	-0.804514	-0.297367	-0.0621685	1.14567	0.969276	0.34208
miaB	0.240527	-1.7219	-0.968549	-0.575947	0.775577	1.07727	0.945241	0.227787
ygjD	0.602384	-1.68659	-1.18164	-0.561807	0.737305	0.863542	0.752667	0.474142
tam	0.96903	-2.211	-0.649752	0.216881	0.385343	0.432797	0.412629	0.444068
tilS	0.942539	-1.66555	-1.45318	0.0119311	0.623985	0.687218	0.416388	0.43667
eptA	0.452178	-1.78111	-1.23482	0.171955	0.896571	0.882418	0.692773	-0.0799624
phoB	0.536294	-1.61392	-1.25583	0.139537	0.759889	0.225277	1.36343	-0.154668
yajB	0.827871	-1.7074	-1.25634	-0.0275897	0.775284	0.496796	0.981928	-0.0905456
ispE	0.501493	-2.07956	-1.00927	0.424104	0.506434	0.660391	0.633222	0.363179
yfbE	0.47781	-2.01927	-1.00245	0.174926	0.325229	0.552961	1.00615	0.484642
moaA	0.622549	-1.99139	-1.00245	0.0874544	0.790829	0.326785	0.916273	0.249954
yjgQ	0.276678	-1.98276	-0.962047	0.116706	1.16007	0.385686	0.665284	0.340384
ycfJ	0.632663	-1.53047	-1.46487	0.075276	-0.0481807	0.827423	1.12934	0.378824
ydhA	0.779122	-1.61401	-1.32037	-0.0351516	0.128607	0.648115	1.25797	0.155712
ypeC	0.737453	-1.83082	-1.14344	-0.0572315	0.280793	0.540123	1.14761	0.325505
der	0.403691	-1.45781	-0.970503	-0.475656	0.119942	0.508554	1.80736	0.0644262
baeS	0.168544	-1.52682	-1.05229	-0.402153	0.513471	0.156001	1.69877	0.444485
mdtB	0.557348	-1.26032	-1.39224	-0.35496	0.339338	0.20881	1.68211	0.219919
fdx	0.442764	-0.955219	-1.43429	-0.532857	-0.332855	0.35943	1.61493	0.838094
mdtC	0.160073	-1.09727	-1.32971	-0.541501	0.0142637	0.166413	1.65197	0.975758
xapA	0.570358	-1.08108	-1.31351	-0.371574	-0.10245	-0.347108	1.40219	1.24317
yegZ	0.279792	-1.44833	-1.28375	-0.131667	0.329167	-0.131667	1.49771	0.88875
ychP	0.360943	-1.49987	-1.34167	-0.237445	0.0692827	0.477177	1.38014	0.791438
ygeK	-0.00529346	-1.59333	-1.04281	-0.174684	-0.0264672	0.481704	1.58274	0.778137
hscB	-0.140558	-1.67193	-1.03194	-0.209823	0.200858	0.48924	1.21095	1.1532
hscA	0.0683307	-1.57125	-1.03588	-0.659697	0.376715	0.562567	1.067	1.19221
yjbO	-0.051405	-1.50148	-0.854064	-0.789653	0.221103	0.538203	1.42014	1.01716
ssuB	-0.863359	-1.37075	-0.993716	0.0491341	1.13209	1.33064	0.554515	0.161441
paaI	-0.336453	-1.55714	-0.867453	-0.214384	1.23824	1.25655	0.707237	-0.226591
tesA	-0.601332	-1.64938	-0.812105	0.0676851	0.903172	1.30279	0.857974	-0.0688034
lpxM	-0.582411	-1.38009	-1.35155	0.0660668	0.609777	1.2485	0.814978	0.574733
ybbA	-0.771966	-1.33617	-1.22783	-0.107433	0.831	1.07896	0.952691	0.580751
ahpF	-0.354788	-1.6287	-1.1196	-0.0561484	1.03451	0.773778	1.11327	0.237679
ybbP	-0.588731	-1.5419	-1.06582	-0.113646	1.10057	1.00156	0.906539	0.30143
dgoA	-0.755767	-1.14169	-1.24304	-0.424418	0.967245	0.80352	1.22063	0.573525
yfaV	-0.192395	-1.34164	-1.34164	-0.315529	0.861077	1.1005	1.14155	0.0880744
ssb	-0.375811	-1.31468	-1.33133	-0.336959	0.64865	1.08917	1.21273	0.408236
yffI	-0.389193	-1.32049	-1.23443	-0.469106	0.560545	1.11686	1.25056	0.485242
frlB	-0.724469	-1.48427	-0.915337	-0.217937	0.74741	1.03738	1.29799	0.259231
sprT	-0.801119	-1.32914	-0.88617	-0.253603	0.534892	1.20112	1.41375	0.120268
yfjY	-0.757269	-1.17023	-1.10207	-0.30822	0.682093	0.978786	1.51604	0.160876
pflC	-1.16988	-1.28692	-0.569094	-0.452056	1.13575	0.332093	1.12014	0.88997
phnM	-1.00486	-1.43768	-0.699005	-0.266184	1.1073	0.270513	1.06113	0.968796
agaD	-0.689346	-1.26294	-0.958865	-0.592596	1.0107	0.243603	1.28021	0.96923
xylH	-0.571138	-1.19038	-0.703832	-1.00018	0.800036	0.233874	1.45024	0.981384
yegL	-0.282962	-1.41849	-1.16042	-0.555784	1.23231	0.450711	0.981609	0.753028
mraZ	-0.328604	-1.46886	-0.897284	-0.762977	0.59202	0.828639	1.36153	0.675533
yneI	-0.404936	-1.31678	-1.03579	-0.816444	0.782454	0.938355	1.20303	0.650119
yoaE	-0.153346	-1.23783	-1.13982	-0.96197	0.6948	0.657649	1.15247	0.988054
sspA	-0.487292	-1.80286	-0.0225254	-0.701497	0.639969	0.30336	1.46776	0.60309
lspA	-0.148331	-2.05172	-0.395338	-0.454319	0.83872	0.566621	0.94316	0.701205
yfeH	-0.0682712	-1.91755	-0.409755	-0.659028	0.337051	0.599496	1.06258	1.05548
yjfP	-0.324751	-1.85592	-0.557721	-0.361705	0.558925	0.300249	1.33817	0.902756
ileS	-0.215835	-2.01033	-0.321755	-0.219388	0.336852	0.428078	1.48017	0.52221
yjgM	-0.00515873	-2.12815	-0.120718	-0.421172	0.454602	0.365456	1.25774	0.597399
dinF	-0.350151	-1.63052	-0.801853	-0.330653	0.325778	0.59875	1.64514	0.543505
recJ	-0.145028	-1.62503	-0.996336	-0.462636	0.53225	0.548928	1.42054	0.727311
rpoC	-0.296205	-1.45345	-0.878832	-0.720246	0.661205	0.517322	1.55889	0.611317
rffA	-0.14065	-1.44471	-0.954662	-0.564082	0.624996	0.760057	1.63977	0.0792792
ydhP	0.221059	-1.61406	-0.97141	-0.562019	0.586416	0.64473	1.51469	0.180596
ftsH	-0.0940561	-1.94205	-0.735354	-0.174112	0.653573	0.701115	1.27729	0.313595
yliI	0.0919647	-1.75203	-1.13423	0.0167695	0.611497	0.561082	1.37627	0.228684
ddlB	-0.421528	-1.86843	-0.55685	-0.376287	0.391601	0.8364	1.13267	0.862424
feaB	-0.513299	-1.93356	-0.617152	0.00877121	0.483126	0.539263	1.1315	0.901343
mrcB	-0.443304	-1.91	-0.732951	-0.121191	0.687276	0.782765	0.936182	0.801225
slt	-0.259346	-2.03454	-0.551312	-0.185038	0.607774	0.697294	1.09867	0.626497
yajI	-0.542295	-1.89612	-0.670919	0.0528668	0.443101	0.898738	1.16035	0.554285
amiB	-0.48019	-1.70415	-0.983892	-0.0729408	0.749317	0.713471	1.23565	0.542737
yfbG	-0.475992	-1.7976	-0.981398	0.154471	0.623618	0.688736	1.10979	0.678377
ypfG	-0.156729	-1.71427	-1.24216	0.110345	0.418781	0.908022	1.03447	0.641539
cysD	-0.222541	-1.21364	-1.58455	0.404566	0.743325	0.226624	1.47279	0.173434
cysN	0.00520204	-1.3143	-1.56191	0.406938	0.753523	0.200704	1.43298	0.0768682
cysU	0.599292	-1.01682	-1.84793	-0.163078	0.752039	0.250975	1.2231	0.202423
cysW	0.134256	-1.10675	-1.74106	-0.210677	0.94594	0.423184	1.22385	0.331252
hslO	-0.346292	-1.09327	-1.13326	-0.303306	0.469218	0.0966096	1.99489	0.315418
ycgZ	-0.0973974	-1.27941	-1.05435	-0.435924	0.942769	-0.188176	1.72573	0.386753
ycjQ	-0.695473	-1.13845	-1.13845	-0.0841657	1.20047	-0.119604	1.49283	0.482844
ubiD	-0.549755	-1.30357	-1.37978	0.0663377	0.387698	0.753131	1.4133	0.61265
cysA	-0.589843	-1.31454	-1.37117	0.133335	0.932483	0.395243	1.3281	0.486395
ycfR	-0.766428	-1.25449	-1.23611	0.110826	0.891665	0.353135	1.48509	0.416318
wzxE	-0.599536	-1.01223	-1.44962	-0.245039	0.56801	0.62092	1.56095	0.556546
dgoT	-0.519224	-1.27532	-1.25169	-0.141177	0.775587	0.336107	1.60729	0.468424
mdtD	-0.419511	-1.24251	-1.28912	-0.195189	0.725404	0.218495	1.64017	0.562261
yqhC	-0.53289	-1.19602	-1.21249	-0.213403	0.459605	0.429962	1.76829	0.496934
setC	-1.98221	-0.48896	0.436209	-0.32665	0.273899	0.127819	0.468671	1.49123
srlA	-2.03571	-0.363521	-0.109056	0.0817921	0.690689	-0.299905	0.836097	1.19962
insB_4	-2.07705	-0.405785	0.180624	-0.0515131	0.250791	-0.0836645	0.980567	1.20603
intE	-2.12718	-0.221186	-0.00884745	-0.0594045	0.163046	0.183269	0.704005	1.3663
thrS	-2.19123	-0.129524	-0.0314424	-0.0515139	0.0949677	0.293551	0.845741	1.16945
mcrA	-2.08242	-0.661401	0.085331	0.04075	0.113194	0.726183	0.670457	1.10791
yaiI	-2.11397	-0.485147	-0.229839	0.102798	0.263594	0.529949	0.880999	1.05161
ydfC	-2.16465	-0.600008	0.0415392	0.240003	0.498469	0.230773	0.710779	1.04309
dgsA	-1.43452	0.0774889	-1.49845	0.419409	-0.0581171	0.633474	0.494962	1.36575
yiaM	-1.57494	-0.267031	-1.13897	0.56131	-0.310628	0.822891	0.604907	1.30246
aaeX	-1.80098	-0.451472	-0.551483	0.725869	-0.437547	0.319496	1.00691	1.18921
yfgI	-1.82396	-0.379772	-0.505614	0.219474	-0.217976	0.620969	0.489135	1.59774
yafN	-1.79786	-0.528711	-0.714499	0.516044	0.373687	0.171009	0.450897	1.52943
yicI	-1.65503	-0.716274	-0.672863	0.200774	0.184495	0.271316	0.808521	1.57906
ygfY	-1.71439	0.153792	-0.976575	-0.231694	-0.162204	0.879411	0.775299	1.27636
wbbL_2	-2.04851	-0.225261	-0.575568	0.143856	0.140329	1.0255	0.501216	1.03843
fabR	-1.91823	-0.0530629	-0.683596	-0.191453	0.361332	1.18235	0.184067	1.11859
ygfX	-1.76162	-0.220792	-0.742677	-0.385788	0.268507	1.03711	0.472295	1.33296
yidZ	-1.64365	-0.612173	-0.497881	-0.412163	0.325016	1.31078	0.259298	1.27078
fabA	-1.3181	-0.617715	-1.23399	-0.274638	0.614157	0.745559	0.745048	1.33968
mntR	-1.5895	-0.659582	-1.143	0.331315	0.449884	0.731062	0.696507	1.18332
allB	-1.21985	-1.0432	-0.962902	-0.304462	1.05524	0.680522	0.568106	1.22655
yadB	-1.21178	-1.03982	-0.820964	-0.547391	1.13899	0.539086	0.929904	1.01198
xerD	-1.39577	-0.795084	-0.88988	-0.521961	1.08205	0.669082	0.819253	1.03231
yicJ	-1.38499	-0.734355	-0.897013	-0.619537	0.825252	0.777412	0.98791	1.04532
yiaI	-1.37102	-0.833179	-1.06347	-0.302626	0.826985	0.990231	0.84156	0.911523
yoaA	-1.00611	-0.920848	-1.22732	-0.480731	1.07696	0.996313	0.657584	0.904142
arpB_1	-1.54683	-0.325247	-1.18036	0.352733	-0.172549	0.810827	1.32389	0.737532
hofQ	-1.30336	-0.70089	-1.12878	0.154897	-0.166879	0.856644	1.40092	0.887452
ydjX	-1.44205	-0.439545	-0.757837	-0.225186	-0.368092	0.985188	1.60878	0.638748
aroL	-1.70668	-0.433783	-0.722707	-0.56978	0.646658	0.811817	1.10046	0.87401
napG	-1.55487	-0.379563	-0.661339	-0.876379	0.517671	0.803154	1.0219	1.12942
yaiA	-1.61158	-0.648079	-0.711568	-0.386775	0.419181	1.0238	1.32449	0.590542
yqeH	-1.7385	-0.456713	-0.696299	-0.32494	0.333924	1.05269	1.29227	0.537573
caiT	-1.64067	-0.754499	-0.486976	-0.411735	0.257073	0.658358	1.14324	1.23521
ybiA	-1.57586	-0.759985	-0.471894	-0.418885	0.131946	0.652815	0.980087	1.46178
ydfV	-1.58969	-0.412465	-0.616692	-0.396419	-0.173228	0.697653	0.974818	1.51602
trmU	-1.35948	-0.766619	-1.0443	-0.178829	0.180602	0.954864	1.25991	0.95385
yebK	-1.5961	-0.685198	-0.854654	-0.0958612	0.178854	0.766456	1.07298	1.21352
ymfE	-1.70065	-0.482955	-0.767202	0.110102	-0.184672	0.69614	1.01899	1.31025
dinJ	-1.56381	-0.911213	-0.722077	-0.102376	0.589641	0.388902	1.1588	1.16214
yebU	-1.79513	-0.779802	-0.505199	-0.122163	0.708687	0.369306	1.01568	1.10862
yafQ	-1.73864	-0.638948	-0.5868	-0.161158	0.457575	0.26519	1.32824	1.07454
ycbS	-1.70298	-0.753256	-0.503328	-0.108997	0.179809	0.468616	1.41834	1.0018
ynjE	-1.76268	-0.734762	-0.469299	-0.0641202	0.137472	0.506724	1.24323	1.14343
sbcB	-1.62659	-0.671162	-0.757515	0.131302	0.105397	0.346568	1.48704	0.984962
yqiI	-1.68346	-0.643903	-0.709845	0.162915	0.0543052	0.500382	1.53218	0.787424
gntX	-1.49994	-0.638243	-0.363499	-0.0869728	1.00486	0.344768	-0.454486	1.69351
idnO	-1.2365	-0.601991	-0.570265	-0.424328	0.844691	0.597232	-0.437018	1.82818
ygaR	-1.0641	-0.870001	-0.786813	-0.343148	0.793746	0.904662	-0.315419	1.68108
entA	-1.37185	-1.51309	0.240436	0.0417575	0.728048	0.667096	-0.125859	1.33346
ycdN_2	-1.25678	-1.28806	-0.0667943	-0.208204	0.377574	0.88579	-0.109217	1.66568
alr	-1.69566	-1.18896	-0.118279	0.41805	0.261003	1.05315	0.116797	1.1539
yqeI	-1.76882	-0.91943	-0.153487	0.335286	0.618417	0.686964	-0.210113	1.41118
nohA	-1.36388	-1.25922	-0.587636	0.319438	0.367409	0.615982	0.332521	1.57539
yfdP	-1.42986	-1.25089	-0.594687	0.255398	0.590958	0.486562	0.471648	1.47087
ydhU	-1.3785	-1.37319	-0.370488	0.0309478	0.713566	0.517269	0.397015	1.46338
dadA	-1.3359	-1.46556	-0.342928	0.0198331	0.452205	0.607533	0.682994	1.38182
dadX	-1.34929	-1.4743	-0.273865	0.0745905	0.425172	0.559363	0.598299	1.44003
ykgG	-1.17636	-1.58128	-0.447937	0.133933	0.621358	0.526913	0.523656	1.39972
chbA	-1.64413	-0.867912	-0.413823	-0.153789	0.346874	0.587502	0.533167	1.61211
fruR	-1.61607	-0.985672	-0.404634	-0.113646	0.321663	0.90364	0.434956	1.45976
yneH	-1.54197	-1.01232	-0.686268	0.115327	0.314658	0.733253	0.639283	1.43803
yqfA	-1.69573	-0.95198	-0.611285	0.0784367	0.5652	0.570928	0.795107	1.24932
atoC	-1.83521	-0.706152	-0.624109	0.172876	0.258825	0.805775	0.700292	1.22771
znuC	-1.71425	-0.983549	-0.59453	0.346765	0.185331	0.836529	0.828032	1.09567
ycbU	-1.50416	-0.796632	0.0481808	-0.522068	0.375546	-0.194703	1.67445	0.919394
yfeK	-1.43043	-0.95566	0.165191	-0.813718	0.219031	0.409918	1.55035	0.855321
yjdF	-1.31684	-1.44323	0.227596	0.0626558	0.34541	-0.21153	1.5107	0.825237
yohG	-1.51126	-0.983053	0.14882	0.0230566	0.500959	-0.580609	1.55737	0.844713
emrK	-0.519263	-1.28449	0.282406	-0.725754	-0.555703	-0.0455494	1.65496	1.19339
yagK	-0.94253	-1.37954	0.394493	-0.295279	-0.382682	-0.139372	1.50002	1.2449
cchA	-0.478141	-1.3562	-0.402948	-0.43448	-0.216179	-0.114305	1.58602	1.41623
ydfI	-0.614058	-1.26885	-0.147628	-0.655917	-0.213407	-0.0280306	1.80181	1.12609
mdtK	-0.668525	-1.48812	-0.0192829	-0.247905	-0.27676	0.0989122	1.93566	0.666028
yhcF	-1.20118	-1.34467	0.285892	-0.148924	-0.192406	0.12501	1.75122	0.725055
yihQ	-1.02226	-1.06732	0.0366099	-0.470297	-0.290063	0.0591391	1.97412	0.780073
ytfG	-0.965351	-1.21688	0.0081513	-0.518192	-0.252691	0.14556	1.79679	1.00261
kefA	-1.6902	-1.18282	0.297864	0.0352903	-0.104883	0.597951	1.33237	0.714431
insB_3	-1.16114	-1.34417	-0.31455	-0.416141	0.0724645	0.691688	1.36654	1.10531
prkB	-1.36512	-1.30249	-0.0455614	-0.384375	0.0584	0.672773	1.31408	1.05229
ybgO	-1.37916	-1.25094	-0.260648	-0.0868827	-0.00590478	0.439475	1.39097	1.15309
ybeF	-1.50837	-1.13263	-0.31157	0.0255132	0.263636	0.526499	1.66609	0.470834
ybcS	-1.25447	-1.33966	-0.272799	-0.102426	0.0821439	0.58312	1.67432	0.62977
yeaV	-1.45653	-1.13242	-0.287587	-0.0378578	0.015276	0.535988	1.64649	0.716643
yfjB	-1.47031	-1.42957	-0.102252	0.0716938	0.17277	0.710278	1.29636	0.751021
sfmF	-1.37939	-0.614674	-0.208118	-0.159719	-0.798592	0.692113	1.72786	0.740513
yjcS	-1.32122	-1.00764	-0.1591	-0.343564	-0.343564	0.578756	1.6671	0.929239
yadG	-1.51599	-0.771312	-0.375983	-0.505516	-0.0372898	0.803836	1.49861	0.90365
yjhW	-1.38484	-0.7436	-0.53563	-0.461974	-0.254005	0.846501	1.40542	1.12813
ydiI	-1.8014	-0.868244	0.243271	-0.312195	-0.132091	1.14846	0.749195	0.973013
yjtD	-1.86948	-0.849259	0.101911	-0.414885	0.371447	1.02412	1.01299	0.623162
focB	-1.64111	-0.803015	-0.501972	-0.0875719	-0.147038	1.0497	1.00139	1.12961
yoeA	-1.61696	-1.00898	-0.349263	0.108336	-0.182716	1.27416	0.868306	0.907113
creD	-0.795474	-1.51661	0.0286816	-0.790791	-0.0134628	0.834107	1.44754	0.80601
setA	-0.891872	-1.40132	-0.186911	-0.792737	0.0664339	1.26432	1.1817	0.76038
yeiN	-0.948036	-1.556	0.267882	-0.704852	0.0094993	0.571862	1.16462	1.19502
ydiL	-1.31381	-1.49692	0.114443	-0.434884	0.315863	1.15816	0.920123	0.737014
pabC	-1.35231	-1.06216	-0.250693	-0.387797	-0.067356	1.39455	1.30528	0.420478
yfgF	-1.26535	-1.16456	-0.276376	-0.547241	0.0196847	1.10944	1.36141	0.762988
yafF	-1.12034	-1.2504	-0.266479	-0.656655	0.0501856	1.23202	0.745717	1.26595
ycbV	-1.27266	-1.27266	-0.253842	-0.177862	-0.253842	1.31411	0.823691	1.09307
ycbK	-0.955296	-1.50127	-0.401802	-0.113922	-0.129509	0.853542	0.684516	1.56374
ycbL	-1.12838	-1.43584	-0.423423	-0.209592	0.196686	0.751026	0.731688	1.51783
yafK	-0.936283	-1.66832	-0.212169	-0.301585	0.0708952	0.812583	0.973497	1.26138
yagB	-1.14688	-1.47149	-0.247809	-0.290816	-0.00204793	1.01786	0.920578	1.22061
yrdD	-1.17071	-1.59292	-0.206636	-0.0454532	0.0337632	0.910369	0.846555	1.22503
ygfO	-1.20272	-1.14836	-0.381278	0.434128	0.252927	-0.586639	1.43678	1.19517
ybfL	-1.32068	-1.17131	-0.494165	0.292516	0.332348	-0.225299	1.13895	1.44764
yraK	-1.27035	-1.02422	-0.563447	0.34093	0.232176	-0.414625	1.21955	1.47999
marB	-0.200854	-0.980916	-0.511477	0.0373682	0.191512	-1.2495	1.83338	0.880488
arpB_2	-0.278902	-1.25966	-0.818317	-0.217605	0.616036	-0.720241	1.59679	1.08189
ompL	-0.355663	-1.15399	-0.662711	-0.0895555	0.0332634	-0.683181	1.89602	1.01582
yagG	-0.537005	-1.11377	-0.383201	-0.344749	0.43476	-0.827136	1.88192	0.889182
yeeW	-0.623866	-1.13542	-0.750338	0.518158	-0.0254832	-0.7409	1.64131	1.11654
ygbM	-0.669015	-1.16095	-0.656561	-0.432388	0.800561	-0.454183	1.75018	0.822355
ypdH	-0.578917	-0.875709	-0.903317	-0.71696	0.836021	-0.178593	1.88515	0.532327
yidP	-0.85947	-0.829046	-0.907279	-0.0206447	0.609561	-0.603041	1.85693	0.752987
yjfM	-0.748135	-0.956076	-1.04649	0.119792	0.734574	-0.648685	1.6025	0.942515
yeeV	-1.01134	-0.905989	-0.985542	-0.0997099	0.867825	-0.301817	1.644	0.792573
zraS	-1.09024	-0.988612	-0.799205	-0.133971	0.683713	-0.314138	1.56607	1.07639
ybdN	-1.24375	-0.728029	0.0214885	-1.23688	0.152138	0.605975	1.05293	1.37612
ygcR	-0.997552	-1.05752	-0.466381	-1.08322	0.557408	0.882965	0.904383	1.25992
insD_3	-1.20958	-0.900499	-0.432913	-0.726145	0.803415	0.430932	0.272428	1.76236
ygfQ	-0.800282	-1.16523	-0.195509	-1.0123	0.332799	0.41274	0.617807	1.80998
ygdB	-0.465116	-1.43183	-0.807113	-0.487916	1.22207	0.132239	0.351117	1.48655
yfaS_3	-0.708291	-0.708291	-0.708291	-0.708291	1.26972	-0.708291	0.74919	1.52255
yiiL	-0.69477	-0.899322	-0.779412	-0.807626	0.892268	-0.27156	0.892268	1.66815
yjdO	-0.746033	-1.08089	-0.938081	-0.593379	0.982399	-0.0861754	1.09073	1.37142
fdrA	-0.75116	-1.16063	-0.729026	-0.408089	0.554724	-0.297421	1.17447	1.61714
eutQ	-0.674604	-1.26163	-1.00599	-0.0307714	0.480507	-0.182261	1.11487	1.55987
ygjI	-0.571753	-1.25972	-0.86925	-0.237068	0.525269	-0.237068	0.859954	1.78963
ynfO	-0.933453	-0.933453	-0.933453	-0.00464406	0.664098	-0.431896	0.812707	1.76009
molR_2	-0.846539	-1.1295	-0.440955	-0.0825318	0.200434	-0.535277	0.936145	1.89823
yrfC	-0.997577	-1.05241	-0.343774	-0.504061	0.364864	-0.170832	0.757146	1.94665
yaiZ	-1.10546	-0.710248	-1.23861	0.0537606	-0.112144	0.684623	0.821996	1.60608
ybaV	-1.0505	-0.573448	-1.10145	-0.411343	-0.119553	0.723396	0.797501	1.7354
ptsA	-1.19685	-0.971395	-0.943213	-0.252757	0.296791	1.03657	0.543382	1.48748
yadI	-1.23145	-0.97809	-0.615854	-0.414535	0.005906	0.920742	0.681077	1.6322
yrfA	-1.39804	-0.691426	-0.736433	-0.448386	0.00168775	1.23039	0.6858	1.35641
fucP	-0.985487	-1.15997	-0.688225	0.177711	-0.287568	0.378039	0.707612	1.85788
insD_10	-0.989407	-1.50928	-0.352379	0.0283735	0.262682	0.189461	0.59218	1.77837
yghZ	-0.865046	-1.3418	-0.419673	-0.164439	0.0144594	0.165258	0.668702	1.94253
yeaT	-0.368303	-1.40529	-0.895689	-0.161973	0.212444	-0.0365744	0.833212	1.82217
ydcJ	-0.566575	-1.31034	-0.824966	-0.27768	0.0802984	0.225643	0.801639	1.87199
yfeU	-0.610893	-1.26569	-0.667443	-0.387667	0.00818497	0.0706877	1.00526	1.84756
paaJ	-0.77855	-0.931937	-1.16742	-0.115311	0.353494	0.273559	0.424786	1.94138
idnD	-1.00946	-1.05596	-0.51345	-0.257694	0.31582	0.098815	0.346821	2.07511
glpF	-0.819334	-0.931362	-0.908852	-0.156067	0.0857876	0.175305	0.467939	2.08658
glpK	-0.780025	-0.981006	-0.692292	-0.184771	0.0312394	0.126662	0.285349	2.19484
aspA	-0.8231	-1.23547	-0.719035	-0.186749	0.176581	0.446612	0.37275	1.96841
glpT	-0.850098	-1.01568	-0.778107	-0.269368	0.114586	0.268168	0.464944	2.06555
yfiQ	-0.869889	-1.16961	-0.668477	-0.234481	0.127581	0.308213	0.504829	2.00183
yehL	-1.00624	-1.21012	-0.666452	-0.351374	0.575327	0.179934	0.729777	1.74915
ygcU	-1.0077	-1.20008	-0.856545	-0.306891	0.627522	0.352695	0.783258	1.60774
sbmA	-0.832415	-1.16459	-0.50602	-0.663441	0.188652	0.265196	0.87177	1.84085
glpB	-1.01092	-0.91203	-0.751673	-0.585971	0.13029	0.35479	1.03898	1.73653
ygfK	-1.05724	-1.16682	-0.574524	-0.435335	0.251724	0.287262	1.01282	1.68211
fucO	-0.949875	-1.04715	-0.715026	-0.430198	0.123336	0.416763	0.696754	1.90539
gatY	-1.05682	-0.934576	-0.705372	-0.459307	0.115423	0.558868	0.57161	1.91018
yjfO	-0.819317	-1.14745	-0.81987	-0.411961	0.25462	0.335133	0.761281	1.84756
ydcH	-1.02287	-0.95449	-0.885865	-0.506234	0.384436	0.526068	0.703229	1.75573
ymdE	-1.14857	-0.968145	-0.852161	-0.323789	0.436551	0.462326	0.629858	1.76393
lyxK	-0.815129	-1.52954	-0.856665	-0.0093456	0.25648	0.912737	0.646912	1.39455
tfaS	-0.66102	-1.46259	-0.969927	-0.141541	0.248814	0.674926	0.785179	1.52616
garD	-0.658026	-1.23771	-0.957776	-0.531685	0.394815	0.39977	1.00918	1.58143
sgcB	-0.660818	-1.27236	-0.826583	-0.535375	0.197126	0.407691	1.07075	1.61956
fucI	-0.842493	-1.08255	-1.03124	-0.33489	0.0792558	0.542879	1.13478	1.53426
lacZ	-0.895185	-1.08146	-0.920977	-0.416607	0.127884	0.497564	1.09077	1.59801
malI	-0.807921	-1.19451	-0.83181	-0.423507	0.0542958	0.668923	0.827467	1.70706
yhbV	-0.727512	-1.21814	-0.874701	-0.485263	0.146422	0.591055	0.885433	1.68271
yhaM	-0.520707	-0.996857	-0.898435	-0.986217	0.101747	0.732181	1.04873	1.51956
araD	-0.862174	-0.926607	-0.874447	-0.785468	0.273073	0.447962	1.26104	1.46662
thiM	-0.926149	-1.04149	-0.732085	-0.816302	0.294985	0.67945	1.0749	1.46669
yidF	-0.886264	-0.996268	-0.798604	-0.765947	0.175964	0.662388	1.05428	1.55445
dgoK	-0.88028	-1.21324	-0.910322	-0.487236	0.238768	0.864633	1.06741	1.32026
paaA	-0.743216	-1.25976	-1.00698	-0.47945	0.311848	0.762449	1.10315	1.31196
uhpB	-0.858513	-1.19315	-0.959704	-0.572249	0.385512	0.944725	1.20036	1.05302
ascF	-1.09329	-1.3331	-0.634026	-0.404397	0.325214	0.82972	1.14758	1.16229
sgcQ	-0.90935	-1.34713	-0.777256	-0.416401	0.2299	0.855449	1.17835	1.18644
yehM	-0.986131	-1.29324	-0.855917	-0.376824	0.414292	0.765626	1.20541	1.12679
endA	-0.71684	-1.20287	-0.909857	-0.740095	0.52731	0.608703	1.05288	1.38077
frdD	-0.788494	-1.38091	-0.695175	-0.60563	0.467015	0.576272	0.96234	1.46459
ybgD	-1.13268	-0.952456	-0.902392	-0.521911	0.399255	0.589496	1.12017	1.40052
yebA	-1.08732	-0.988829	-1.04066	-0.457673	0.584821	0.665013	0.987305	1.33734
paaK	-1.00627	-1.24858	-0.8701	-0.40351	0.559708	0.591749	1.08838	1.28863
yhfT	-0.957931	-1.28398	-0.832904	-0.509303	0.790002	0.591429	0.90032	1.30237
cdaR	-0.991908	-1.18571	-0.766683	-0.46289	0.618715	0.246831	1.01155	1.53009
citX	-1.02531	-1.13542	-0.861075	-0.471013	0.501341	0.482678	1.0743	1.4345
yjhH	-1.06101	-1.12106	-0.828564	-0.375299	0.42082	0.397575	1.00193	1.5656
ykgE	-1.24421	-1.37904	-0.385723	-0.064856	0.267958	0.384869	0.859342	1.56166
ybaE	-1.14288	-1.18193	-0.616998	-0.235605	-0.0520673	0.600076	1.17151	1.45789
gatR_2	-1.2814	-1.11412	-0.70375	-0.249462	0.272616	0.627033	1.00914	1.43994
pflD	-1.06843	-1.18209	-0.84963	-0.247217	0.215959	0.588205	1.11105	1.43215
yfaQ	-1.12834	-0.984402	-0.831656	-0.388106	0.190565	0.519555	1.01892	1.60346
yaiW	-0.818503	-1.54613	-0.56826	-0.192896	0.194018	0.482119	0.831817	1.61784
glpC	-1.0363	-1.3783	-0.805554	0.0412048	0.179241	0.667518	0.867361	1.46483
frdA	-0.851953	-1.44618	-0.823398	-0.271062	0.431343	0.564946	1.03245	1.36385
araA	-1.04081	-1.29181	-0.759261	-0.270366	0.449882	0.500081	0.862387	1.5499
frdB	-0.880401	-1.37615	-0.752332	-0.313238	0.291696	0.5319	0.951223	1.5473
ompW	-1.16395	-1.29828	-0.715298	-0.0732089	0.402313	0.380821	1.02022	1.44739
ymfH	-1.03781	-1.36955	-0.720703	-0.0799878	0.325744	0.354202	1.04696	1.48115
fhuB	-0.297605	-1.18414	-1.4964	-0.335686	0.689461	0.368055	1.10531	1.15101
ulaE	-0.605324	-1.0437	-1.39543	-0.457497	0.541605	0.750601	0.89333	1.31642
paaC	-0.381618	-1.213	-0.749606	-0.967674	0.490651	0.149921	1.17211	1.49921
aroM	-0.522635	-1.07618	-0.988514	-0.757396	0.292313	0.320321	1.14506	1.58703
yhfY	-0.491156	-1.17466	-0.964349	-0.740021	0.567393	0.188839	1.05461	1.55935
yfhR	-0.490927	-0.789689	-1.47133	-0.595348	0.599699	0.292235	0.947771	1.50759
eutL	-0.791064	-0.9809	-1.11456	-0.607039	0.578467	0.355701	1.09955	1.45985
yrfB	-0.814048	-0.735762	-1.1174	-0.799369	0.370022	0.482557	1.05991	1.55409
ydcD	-1.24725	-0.320309	-0.409438	-0.627805	-0.240092	-0.213354	1.51576	1.5425
recN	-0.881369	-0.343288	-0.847064	-0.667915	-0.171128	-0.184469	1.33766	1.75758
yjhI	-0.720422	-0.462282	-0.562377	-0.804713	-0.46755	-0.0829737	1.18139	1.91893
hyi	-0.78537	-0.841828	-0.704716	-0.462754	0.126022	-0.341772	1.11807	1.89235
galS	-0.654103	-0.897357	-0.552588	-0.746042	-0.129288	-0.0679961	1.177	1.87037
ybdD	-0.80415	-0.998292	-0.674075	-0.510349	-0.00299311	0.00347842	1.19098	1.7954
chbC	-0.819294	-1.01767	-0.687939	-0.336765	-0.141073	0.0841075	1.00091	1.91772
yfaW	-0.63495	-0.950719	-0.810377	-0.369859	-0.245111	0.0433696	1.01797	1.94968
glpA	-0.794216	-0.721905	-0.9533	-0.572462	-0.0711059	0.222959	1.00874	1.88129
pepE	-0.983249	-0.496478	-0.92264	-0.521101	-0.100622	0.266825	0.753596	2.00367
ymfQ	-0.997612	-0.736943	-1.01425	-0.265521	0.167077	0.0838854	0.876983	1.88638
sulA	-1.12261	-0.850804	-0.73081	-0.206568	-0.0805295	0.0403537	1.27941	1.67156
yeiA	-1.19627	-0.888581	-0.815623	-0.0574941	-0.0162569	0.196273	1.06225	1.7157
yeiT	-1.15849	-0.937451	-0.535567	-0.077865	-0.227455	0.0962848	0.978198	1.86234
ygeW	-0.943388	-0.673848	-0.680942	-0.305005	-0.553265	0.106397	1.26967	1.78038
ypjK	-1.08356	-0.689155	-0.854553	-0.388047	-0.256578	0.388047	1.22352	1.66033
tfaQ	-0.791789	-0.807928	-0.299569	-1.03386	-0.057493	0.16441	0.894671	1.93156
ybdH	-0.68797	-0.938781	-0.436219	-1.0252	0.0644641	0.35379	0.73893	1.93099
yegU	-0.77621	-0.791448	-0.509537	-0.840973	-0.258102	0.294293	0.941928	1.94005
ibpB	-0.781874	-0.774433	-0.777896	-0.725034	-0.305833	0.492482	1.1231	1.74949
pspD	-0.782472	-0.711311	-0.64751	-0.995958	-0.18864	0.552424	1.01007	1.7634
yfiA	-0.731582	-0.627155	-0.942695	-0.886705	-0.0423849	0.369149	1.14367	1.7177
putA	-0.843084	-0.8219	-0.372995	-0.859224	-0.313477	0.202007	1.3157	1.69298
ytfR	-0.653822	-0.998456	-0.675635	-0.902482	0.0899755	0.231755	1.37472	1.53395
gntT	-0.319595	-1.20603	-0.939767	-0.546164	0.333652	-0.187292	1.50619	1.359
aes	-0.811399	-1.14334	-0.9263	-0.344703	0.472371	-0.0127668	1.44832	1.31781
nikC	-0.8518	-1.0626	-0.796808	-0.324795	0.449672	-0.283551	1.48077	1.38912
phnI	-0.654389	-1.08196	-0.86296	-0.591818	0.701318	-0.237249	1.50431	1.22274
caiE	-0.498635	-0.871045	-0.699164	-0.97131	0.511169	-0.341077	1.61407	1.25599
thiF	-0.583744	-0.754983	-0.911423	-0.902967	0.477513	-0.175731	1.66984	1.18149
citC	-0.938764	-0.907795	-0.86134	-0.688427	0.0883922	0.627778	1.54654	1.13361
ibpA	-0.939196	-0.942809	-0.925397	-0.627688	0.0868359	0.721526	1.29495	1.33178
gntP	-1.24653	-0.824844	-0.758397	-0.487495	0.10031	0.498995	1.34748	1.37048
insB_1	-1.19718	-0.821791	-0.736099	-0.632574	0.115597	0.604082	1.25612	1.41185
fucK	-0.894454	-0.803663	-0.857465	-0.363162	-0.221932	0.100878	1.58043	1.45937
uidB	-0.819818	-0.825044	-0.83027	-0.49581	-0.250191	0.183561	1.48482	1.55276
ygeY	-1.06119	-0.880561	-0.661439	-0.542994	-0.119555	0.363107	1.51202	1.39061
ygfT	-1.06378	-0.660011	-0.867073	-0.52542	-0.24071	0.52542	1.59179	1.23978
fucA	-1.01738	-0.877828	-0.52485	-0.389405	-0.467388	0.32476	1.68332	1.26877
sfmH	-0.763784	-1.08061	-0.379063	-0.560108	-0.43564	0.209333	1.62375	1.38613
argK	-1.11557	-0.733583	-0.461564	-0.727795	-0.235846	0.400794	1.69144	1.18213
yghT	-1.17073	-0.730727	-0.341006	-0.667868	-0.13986	0.08643	1.72074	1.24302
citT	-0.937032	-0.894637	-0.624849	-0.563183	0.0457677	-0.0582934	1.44096	1.59127
ssnA	-1.10053	-0.75119	-0.477025	-0.671594	-0.0127133	0.0138189	1.34485	1.65439
yafM	-1.29928	-0.712642	-0.231342	-0.603668	-0.0388219	-0.064249	1.35422	1.59578
dcuB	-1.14637	-0.968918	-0.579737	-0.462782	0.117964	0.162327	1.34802	1.5295
hscC	-1.23207	-1.1335	-0.377834	-0.447195	0.213559	0.239113	1.41095	1.32698
yphE	-0.9598	-1.13052	-0.577709	-0.354145	-0.15497	0.271833	1.34494	1.56037
insA_4	-0.941916	-0.598487	-0.892979	-0.46566	0.260084	-0.36735	1.40616	1.60015
ygcB	-0.982996	-0.661902	-0.93793	-0.380242	0.183079	-0.216879	1.50688	1.48998
fepD	-1.14127	-0.844494	-0.823745	-0.545836	0.372143	0.218727	1.36872	1.39575
ligB	-1.2316	-0.517083	-0.829503	-0.551797	0.177182	0.0585786	1.45579	1.43843
ycdU	-1.04643	-0.685481	-0.84379	-0.628489	0.163059	0.1124	1.47386	1.45487
ybiP	-1.10598	-0.7623	-0.720295	-0.466354	0.255373	-0.147496	1.59572	1.35133
yijF	-1.13272	-0.662104	-0.827631	-0.600438	0.519298	-0.0973683	1.52544	1.27552
fepG	-0.896338	-1.1023	-0.369113	-0.60754	0.0898297	-0.0937476	1.59315	1.38606
ydjM	-1.09374	-0.914239	-0.522597	-0.695572	0.322697	0.0844476	1.66081	1.1582
prpB	-0.860297	-1.04621	-0.681534	-0.763765	0.351716	0.19798	1.52083	1.28128
ybaJ	-0.778643	-1.12742	-0.716051	-0.661163	0.260767	0.184694	1.5673	1.27052
yjhP	-0.732989	-0.932087	-0.714027	-0.894163	0.24828	0.189025	1.70596	1.13
thiH	-0.78432	-0.77521	-0.809373	-0.718272	0.163127	-0.0919547	1.62985	1.38615
lrhA	-0.791015	-1.00395	-0.73471	-0.632338	0.299758	-0.0262967	1.73092	1.15763
yigE	-0.989806	-0.888359	-0.742643	-0.541592	0.203587	0.0154478	1.55192	1.39145
sgcC	-0.880956	-0.912991	-0.76637	-0.609893	0.195905	0.0271063	1.63008	1.31712
ymcD	-0.81917	-0.992562	-0.667835	-0.645778	0.177681	-0.0116412	1.66714	1.29217
yahN	-0.828167	-0.77202	-0.779506	-0.730845	-0.0383671	0.227395	1.81822	1.10329
rhaD	-0.693492	-0.775945	-0.675823	-0.775945	-0.228219	0.0957047	1.786	1.26772
ytfT	-0.88934	-0.822325	-0.591497	-0.744141	-0.0665493	0.0898182	1.66094	1.3631
fixA	-1.42313	-0.714971	-0.21381	-0.333653	0.113034	0.766722	1.92157	-0.115757
aroH	-1.25274	-0.972044	-0.365205	-0.826976	0.626153	0.649574	1.60073	0.540509
prfA	-1.36149	-0.724482	-0.714642	-0.619424	0.476597	0.492804	1.58188	0.868756
yhcG	-1.17367	-0.694703	-0.524038	-0.931432	0.491694	0.326535	1.75792	0.747692
cobC	-1.03536	-0.626141	-0.745001	-0.768773	0.773019	0.63548	1.83937	-0.0725898
asr	-0.998419	-1.00943	-0.919403	-0.381216	0.593185	0.841457	1.7044	0.169428
ycdZ	-1.17609	-1.03942	-0.711686	-0.35118	0.742193	0.750561	1.66682	0.118803
eutG	-1.37091	-1.06675	-0.411637	-0.435034	0.723107	0.886885	1.51275	0.161584
yjjA	-1.24708	-1.04344	-0.563471	-0.379445	0.423	0.848163	1.71291	0.249358
pheA	-0.478742	-0.591946	-0.902595	-1.42025	0.297406	0.614227	1.38753	1.09438
trpA	-0.639549	-0.471695	-0.808557	-1.428	0.650101	0.642075	1.63107	0.424564
trpB	-0.584338	-0.566613	-0.846671	-1.33918	0.552362	0.585176	1.71661	0.482662
holD	-0.640431	-0.701283	-1.03478	-0.83089	0.662756	0.375091	1.92248	0.247064
trpC	-0.759308	-0.730107	-0.873133	-1.06841	0.683135	0.537934	1.73291	0.476983
trpD	-0.73308	-0.875071	-0.854914	-1.02461	0.777191	0.577657	1.65969	0.473139
trpE	-0.846466	-0.818195	-0.89594	-0.960599	0.761995	0.660073	1.62796	0.47117
ttdB	-1.0007	-0.368135	-0.741455	-1.12514	0.979965	0.160735	1.70586	0.388875
dnaE	-0.597542	-0.451956	-1.49132	-0.803164	0.351771	0.51912	1.47969	0.993403
thiE	-0.677462	-0.550782	-1.1291	-0.919807	0.36627	0.272637	1.78178	0.856467
ygbL	-0.889667	-0.54097	-0.941809	-0.918997	0.244414	0.231378	1.6392	1.17645
thiI	-0.883161	-0.779246	-1.15983	-0.667878	0.490523	0.481754	1.55816	0.959671
uup	-0.935065	-0.5095	-1.21022	-0.795996	0.546356	0.501591	1.60818	0.794653
yraH	-1.13262	-0.59617	-1.07394	-0.571024	0.652749	0.459962	1.71726	0.543782
phnE_1	-0.875793	-0.639624	-0.492674	-0.503171	0.751148	-0.461185	2.13142	0.0898753
phnG	-0.933021	-0.654065	-1.00065	-0.290578	0.935134	-0.129968	1.92416	0.148987
yfcS	-1.14144	-0.765959	-0.797249	-0.265315	0.746402	0.0945226	1.95108	0.177963
lipB	-1.39298	-0.485927	-0.667577	-0.204356	0.167295	0.22516	2.03837	0.320012
yfcR	-1.63776	-0.595011	-0.418962	-0.107491	0.556077	0.0617863	1.83582	0.305546
yghR	-1.51512	-0.489549	-0.528008	-0.0600919	0.375775	0.0681042	2.00387	0.145022
insE_1	-1.43049	-0.809153	-0.38363	0.166161	0.811978	0.0381276	1.84566	-0.238651
yqhG	-1.41173	-0.890207	-0.554307	0.0939192	0.674377	0.0408824	1.84413	0.202939
fecE	-1.05185	-1.13394	-0.400783	-0.248867	0.359737	0.0445837	2.02137	0.409747
rnr	-0.966351	-1.32582	-0.494225	-0.125566	0.51876	0.0659306	1.89397	0.433303
yfjM	-1.00723	-1.42203	-0.297839	-0.293126	0.611882	0.152308	1.77849	0.477545
yjiG	-1.12203	-1.16318	-0.293467	-0.264521	0.649968	0.099556	1.94346	0.15021
yjiH	-1.20931	-1.14803	-0.357913	-0.298261	0.657258	0.0563983	1.82915	0.470709
citG	-0.906284	-1.32854	-0.124656	-0.263912	0.180808	-0.0707509	2.0091	0.50424
ydhV	-0.912584	-1.36281	-0.157581	-0.136801	0.119484	0.070998	2.03123	0.348063
etp	-0.582487	-1.36443	-0.526918	-0.272886	0.0803772	0.0625157	2.02531	0.578518
ybjL	-0.850942	-1.33407	-0.388347	-0.402718	0.27133	0.144732	1.9171	0.642911
ykfF	-0.8816	-1.28437	-0.409388	-0.429353	0.244244	0.112302	1.89091	0.757253
gspD	-1.42343	-0.985329	-0.160291	-0.0739496	0.309789	-0.0547628	1.9087	0.479274
yeeA	-1.27552	-0.988279	-0.173414	0.0669717	0.0944735	-0.156098	2.04404	0.387825
ybbM	-1.23866	-0.949731	-0.18877	-0.150134	-0.123257	-0.0359063	2.00676	0.679699
yhcD	-1.21915	-1.14025	-0.149971	-0.111882	-0.0248249	0.122085	1.96118	0.562814
ykiA	-1.11609	-0.989387	-0.158384	-0.556607	0.177308	-0.0185125	1.98906	0.672619
uxuB	-0.30887	-0.766216	-0.731432	-0.758487	0.122711	-0.418375	2.11056	0.750113
ddpB	-0.457218	-0.85987	-0.92008	-0.792134	-0.0357496	0.0959593	1.76678	1.20231
rbfA	-0.487466	-0.722987	-0.855494	-0.888951	0.0308981	0.0700784	1.99232	0.861602
yhgE	-0.299231	-0.932255	-0.471433	-1.01957	-0.129455	-0.0494171	1.97577	0.925585
eptB	-1.03187	-0.674628	-0.775147	-0.580514	0.379351	-0.15429	1.83689	1.00021
perR	-1.04718	-0.777797	-0.748048	-0.382804	0.286535	-0.184481	1.87642	0.977359
citF	-0.953737	-0.810917	-0.72852	-0.459359	0.0460045	-0.0968157	1.79281	1.21054
thiG	-0.982507	-0.916842	-0.695224	-0.429282	0.212589	-0.110809	1.77705	1.14503
asnA	-0.933204	-0.945174	-0.563806	-0.4203	0.254701	-0.2703	1.91948	0.958607
xdhB	-0.877717	-1.094	-0.587367	-0.498484	0.449599	-0.172581	1.80358	0.97697
ycjN	-1.14098	-0.785736	-0.371282	-0.578509	0.280003	-0.242998	1.88848	0.951024
gspF	-0.876617	-1.04113	-0.571094	-0.575794	0.144928	0.202899	1.96553	0.751274
glvC	-0.953643	-0.99091	-0.596942	-0.458521	0.0206301	0.281501	1.99047	0.707413
yccZ	-0.964211	-1.12287	-0.537173	-0.398766	0.0772213	0.246011	1.9204	0.779386
fecD	-0.902116	-1.03842	-0.631919	-0.508882	0.206418	0.0894125	1.90239	0.883118
yggM	-0.984223	-1.0585	-0.671182	-0.395281	0.188355	0.145909	1.83315	0.941776
gspJ	-1.00361	-0.867506	-0.706363	-0.496223	0.289895	-0.0302144	1.88173	0.93229
gspK	-0.967139	-0.949884	-0.684007	-0.485579	0.241466	0.0712732	1.91045	0.863415
gspL	-0.976763	-0.909466	-0.69805	-0.482826	0.200939	0.0434893	1.89734	0.925337
yjiL	-0.962388	-0.931031	-0.680181	-0.593951	0.220194	0.187718	1.87984	0.879797
ybcH	-0.828819	-0.86572	-0.654695	-0.515165	0.0118197	0.127134	2.11745	0.607993
gspM	-0.862964	-0.858375	-0.645024	-0.498967	0.135734	-0.0164411	2.10254	0.643495
ybhJ	-0.793161	-0.923879	-0.761231	-0.433938	0.158782	-0.0138451	2.05269	0.714581
yafX	-0.878433	-0.836299	-0.797302	-0.509982	0.133687	0.0875184	1.9858	0.815008
ykfI	-0.743911	-0.831119	-0.821765	-0.573073	0.231052	-0.0454262	2.0327	0.751545
yafW	-0.804559	-0.722894	-0.754194	-0.66883	0.0231906	0.012947	1.98942	0.924923
gspI	-0.72076	-0.692968	-0.701142	-0.57526	0.0378057	-0.336573	2.04049	0.948412
yafY	-0.871077	-0.713818	-0.634653	-0.442091	-0.117944	-0.216365	2.03875	0.957195
ykfG	-0.766592	-0.804849	-0.749398	-0.50696	-0.0233733	-0.124819	1.98878	0.987215
yoeF	-0.640569	-1.01926	-0.754526	-0.538884	0.251801	-0.172469	1.92083	0.953073
ykfH	-0.825604	-0.772547	-0.789755	-0.733113	0.348811	-0.0534151	1.88387	0.941755
ypdD	-0.720047	-0.775561	-0.866995	-0.635143	0.262874	-0.158378	1.91849	0.974757
ygfU	-0.398677	-1.13789	-0.564793	-0.465123	-0.4319	0.0664462	1.97677	0.955164
yagH	-0.394845	-1.11337	-0.671653	-0.485151	-0.0964413	-0.218158	1.94919	1.03042
ymcB	-0.53734	-1.15731	-0.500617	-0.383969	-0.113948	-0.234917	2.02029	0.907807
yieM	-0.802627	-1.06243	-0.484352	-0.327435	0.0419125	-0.217889	2.04557	0.807253
yqiK	-0.74073	-1.01815	-0.636129	-0.438298	0.0278555	-0.101758	1.99252	0.914685
cadB	-0.724001	-0.891886	-0.2903	-0.751982	0.297295	-0.262319	2.15801	0.46518
iadA	-0.861828	-0.691797	-0.292953	-0.473421	0.13748	-0.318773	2.3042	0.197087
gspG	-0.796718	-0.589821	-0.445216	-0.331757	-0.127085	-0.618742	2.18882	0.720522
yeeT	-0.646618	-0.726509	-0.471856	-0.279618	-0.254653	-0.476849	2.25942	0.596686
yibG	-0.907391	-0.522552	-0.696107	-0.401818	0.03207	-0.401818	2.1185	0.779111
yjhQ	-0.870829	-0.573139	-0.696321	-0.31651	-0.0256629	-0.229256	2.24978	0.461933
ypdE	-0.764458	-0.747556	-0.522198	-0.668681	-0.248951	0.0524663	2.10886	0.790515
gspH	-0.625408	-0.746699	-0.673925	-0.390912	-0.328244	-0.0108657	2.24919	0.526859
ybcN	-0.874359	-0.832695	-0.517903	-0.240145	-0.226257	-0.0364557	2.21338	0.514431
ymcC	-0.779624	-0.901112	-0.597391	-0.275805	-0.109652	-0.0685604	2.2022	0.529948
yjiK	-0.658606	-0.648017	-0.413872	-0.502118	-0.184433	-0.25856	2.34998	0.315625
ppdD	-0.745699	-0.673694	-0.644892	-0.526084	-0.101257	0.0463531	2.2677	0.377575
ypdG	-0.756553	-0.641037	-0.589359	-0.592399	-0.0877768	-0.0452184	2.25902	0.453324
mog	-0.893331	-0.979363	-0.692839	-0.141485	0.388921	-0.342726	2.01381	0.647017
yjiD	-0.87918	-0.877273	-0.796937	-0.15188	0.463331	-0.263312	2.08242	0.422834
ybhI	-0.780776	-0.860143	-0.677598	-0.264888	0.266873	-0.225205	2.21137	0.330366
yjiE	-0.871857	-0.784028	-0.710023	-0.348834	0.324798	-0.226081	2.15091	0.465116
ybcD	-0.721884	-0.910373	-0.837072	-0.554339	0.409046	0.0739555	2.05832	0.482347
yjiJ	-0.638624	-0.829866	-0.850783	-0.458588	0.218975	-0.0805867	2.16576	0.473715
ycdK	-1.01416	-0.872595	-0.293749	0.0239875	-0.0892651	-0.249706	2.23241	0.263076
yfcI	-0.918305	-0.810104	-0.40342	0.0144578	-0.0900115	-0.164633	2.30159	0.0704235
ybfB	-0.863503	-0.727212	-0.699954	-0.115848	-0.0535431	-0.0769073	2.2673	0.269662
gspE	-0.917237	-0.968212	-0.527276	-0.175546	0.109915	0.0130624	2.19735	0.267939
ydhJ	-1.00028	-0.794289	-0.646947	-0.242113	0.151276	-0.00464925	2.17687	0.36013
yfdL	-1.15232	-0.876373	-0.59021	0.104756	0.0229953	0.0740957	2.10789	0.309158
yqiG	-1.08985	-1.01884	-0.371831	-0.300818	0.196272	0.338297	2.08995	0.15682
insM	-0.932084	-1.06022	-0.191417	-0.213293	0.305486	-0.291423	2.16809	0.214856
ybfC	-1.15607	-0.83363	-0.488845	-0.0802105	0.567858	-0.393071	2.03	0.353964
yraI	-1.21365	-0.824973	-0.350783	-0.156444	0.341066	-0.218632	2.10567	0.317746
ydcF	-0.432999	-1.86399	-0.37731	-0.172177	-0.156669	0.747747	1.26727	0.988124
yhbP	-0.464166	-1.5152	-1.01943	0.14398	-0.272468	0.791789	1.15535	1.18014
yphB	-0.707085	-1.57611	-0.664259	-0.0932371	-0.169968	0.820397	1.13446	1.2558
prpC	-1.08536	-1.18093	-0.779524	-0.0961713	-0.110507	1.11284	1.43779	0.70187
arsB	-0.950322	-1.33526	-0.62633	-0.097037	-0.0745823	0.743416	1.72501	0.615103
rhaR	-1.14423	-1.21346	-0.601266	-0.0400844	-0.0510164	0.980246	1.6471	0.422708
ycjS	-0.647059	-1.65272	-0.786236	0.143105	0.0353553	1.04551	1.36876	0.493292
fdnI	-0.942434	-1.38525	-0.916301	-0.0147001	0.219048	0.89416	1.39215	0.75333
hyfE	-0.868873	-1.41778	-0.988437	0.16372	0.0495917	0.875667	1.28327	0.90284
yfeN	-0.808774	-1.54019	-0.692498	0.207703	-0.0473545	0.699062	1.62927	0.552779
yiiF	-0.989681	-1.37861	-0.880696	0.392934	-0.00240414	0.715616	1.50843	0.634411
hyuA	-0.916683	-1.38446	-0.776718	-0.272104	0.13306	1.0944	1.28225	0.840255
paaG	-0.69854	-1.5761	-0.649396	-0.242207	-0.0456333	1.20402	1.20402	0.803848
ysdC	-0.788428	-1.38616	-0.520853	-0.54459	-0.102229	1.08459	1.40612	0.851546
ftsB	-0.397745	-1.44251	-0.726247	-0.52657	0.22512	0.183253	1.70853	0.976167
phnN	-0.411695	-1.4672	-0.616932	-0.33351	0.145376	-0.0207681	1.85568	0.849045
ssuE	-0.531208	-1.64097	-0.459244	-0.413793	0.135406	0.404324	1.65422	0.851258
fdnG	-0.301554	-1.68716	-0.821155	-0.0231965	0.298461	0.174747	1.67169	0.688162
ybbY	-0.489325	-1.64858	-0.959748	0.429121	0.177109	0.294715	1.54918	0.647532
ompG	-0.36363	-1.13798	-1.34726	0.0967937	-0.217132	0.368862	1.60364	0.996713
pcm	-0.450274	-1.29394	-1.06951	-0.0328149	-0.00913703	0.254928	1.81564	0.785117
agaA	-0.675039	-1.12904	-0.9058	-0.0830865	0.0950008	-0.183417	1.7931	1.08828
fdnH	-0.429491	-1.25158	-0.815944	-0.274909	0.101005	-0.25383	1.74168	1.18308
ydhH	-0.38168	-1.36877	-1.09341	0.0908624	0.227375	-0.116823	1.65317	0.989277
yqaD	-0.593166	-1.22985	-0.981148	0.322075	0.0932651	-0.354407	1.66509	1.07814
gidB	-1.34927	0.0167404	-0.632516	-0.553233	-0.186822	-0.0432566	1.94844	0.799918
agaI	-1.10888	-0.37165	-0.857733	-0.476968	-0.306839	0.227851	1.85623	1.03799
mdtI	-1.12179	-0.486088	-0.653659	-0.318517	-0.148287	-0.281279	1.92108	1.08854
alsA	-0.857945	-0.899745	-1.16727	-0.164065	-0.130625	0.446215	1.42434	1.3491
ydcN	-0.938043	-0.422426	-1.35223	-0.37171	-0.143485	0.595285	1.5758	1.0568
yedA	-1.00226	-0.462184	-1.28714	-0.396899	-0.0289328	0.445863	1.50228	1.22927
yaiS	-1.14452	-0.361427	-1.44571	-0.120475	0.346367	0.436724	1.65654	0.632497
ybcQ	-1.09466	-0.4257	-1.07033	-0.194606	0.206769	0.0729771	2.04336	0.462189
yfjD	-1.17059	-0.920475	-0.687276	-0.329753	0.11237	0.655275	1.88454	0.455916
yicG	-0.923125	-0.774351	-0.871908	-0.703623	0.284132	0.64509	1.89625	0.447539
phnH	-1.03526	-0.641173	-0.841344	-0.4973	0.0656811	0.121979	1.93603	0.891386
ybfM	-1.08754	-0.50752	-1.01381	-0.571421	0.170812	0.328106	1.82732	0.854059
insA_5	-1.1507	-0.670134	-1.02938	-0.194295	-0.0981813	0.581702	1.78154	0.779443
insA_6	-1.23113	-0.77985	-0.843887	-0.259259	0.136269	0.417282	1.83968	0.720897
yadD	-1.12475	-0.797485	-0.863315	-0.163635	-0.0470215	0.267082	1.87898	0.850149
ycgH_2	-1.22752	-0.613758	-0.931825	-0.210979	-0.087908	0.364419	1.79972	0.90785
yihO	-1.37412	-0.749789	-0.773497	-0.267711	0.135337	0.396133	1.6606	0.973046
fixB	-1.5785	-0.611762	-0.913867	-0.32692	1.00234	0.484446	1.14908	0.795183
phnE_2	-1.5098	-0.582956	-0.788921	-0.524109	0.902938	0.388024	1.43256	0.682261
yhaL	-1.63362	-0.745045	-0.783095	-0.127298	1.22234	0.383014	1.05224	0.631456
yhbE	-1.57604	-0.361071	-1.17977	-0.204171	0.830765	0.803609	1.15462	0.532052
yehR	-1.30125	-0.704499	-1.27785	-0.0570425	0.707424	0.516307	1.34708	0.769829
caiB	-1.42725	-0.879	-0.827603	-0.197501	0.712433	0.324093	1.4796	0.815229
torZ	-1.44826	-0.554731	-1.02756	-0.201044	0.52867	0.309011	1.55623	0.837682
yjgI	-1.26404	-0.627802	-1.10749	-0.334815	0.561377	0.29137	1.54949	0.931918
phnF	-1.26424	-0.908603	-1.03871	0.0368646	0.609349	0.574653	1.63288	0.357803
grpE	-1.37028	-0.979572	-0.889037	0.276869	0.857128	0.411578	1.53875	0.154564
ymjC	-1.34188	-0.942169	-0.927143	0.142753	0.725786	0.377168	1.62738	0.338099
yzcX	-1.35863	-0.776153	-0.910836	-0.181016	0.8999	0.266776	1.61591	0.444051
astD	-1.06782	-1.67871	-0.205398	-0.0779938	0.477355	0.222548	1.19278	1.13724
yebO	-0.74498	-1.77821	-0.149726	-0.391941	0.453491	0.264364	1.36993	0.977075
yebS	-0.812491	-1.82472	-0.137255	-0.25539	0.295494	0.431038	1.16596	1.13736
yhcC	-0.91907	-1.63652	-0.196382	-0.227804	0.0654608	0.369199	1.21233	1.33278
astE	-0.86899	-1.46882	-0.273481	-0.614389	0.580945	0.145101	1.52599	0.973636
gudX	-0.972807	-1.5396	-0.318819	-0.300653	0.4587	0.226171	1.56685	0.880159
astB	-1.0074	-1.35093	-0.450769	-0.612431	0.471436	0.438369	1.33669	1.17503
ycdM	-1.04748	-1.33479	-0.233438	-0.643879	0.293294	0.35486	1.42885	1.18258
ygjM	-0.96233	-1.56319	0.0624176	-0.541182	0.340897	0.140611	1.34918	1.17359
yjeJ	-0.80534	-1.53767	-0.0228851	-0.770467	0.264814	0.343278	1.33061	1.19766
clpA	-0.865244	-1.64203	-0.25177	-0.44145	0.320973	0.55539	1.46585	0.858273
eutI	-0.93581	-1.50478	-0.103313	-0.528545	0.148232	0.441702	1.60959	0.872923
yfhA	-1.129	-1.26787	-0.243426	-0.432505	0.125118	0.322743	1.70398	0.92096
ygcE	-0.922799	-1.538	-0.3076	-0.167174	-0.0267477	0.401217	1.61155	0.949547
yphC	-1.01579	-1.65699	0.057346	-0.197525	0.253194	0.255877	1.5973	0.706595
ybeR	-0.891899	-1.38725	-1.03945	0.636318	0.277977	0.362293	1.52163	0.520384
ychS	-1.03192	-1.27273	-1.13567	0.406525	0.476974	0.451356	1.37872	0.726749
yciW	-0.789349	-1.12445	-1.40162	0.760133	0.544694	0.135665	1.43617	0.438753
hcp	-1.14555	-1.05695	-0.940006	0.13378	0.233008	0.52006	1.76041	0.495253
iap	-1.07325	-1.00277	-1.20638	0.236107	0.257251	0.649589	1.59637	0.543086
yibJ	-0.981114	-1.06076	-1.14862	0.20702	0.135584	0.403264	1.65873	0.785897
recO	-1.48397	-0.965565	-0.658873	0.0969855	0.366486	0.451742	1.67908	0.51411
yfaP	-1.27981	-1.02435	-0.83213	0.0885244	0.225105	0.306042	1.64656	0.870069
yifO	-1.38914	-0.982702	-0.744975	0.205935	0.167592	0.294124	1.66809	0.781081
kptA	-1.03495	-1.24642	-0.767222	0.0110366	0.129235	0.401234	1.73631	0.770782
yjcP	-1.24027	-1.15948	-0.762889	0.0670168	0.184526	0.478298	1.60932	0.823479
tauA	-0.933411	-1.01987	-0.8828	0.454185	0.0366407	0.12521	2.01048	0.209563
ylbE_2	-0.897495	-1.03619	-0.957598	0.309182	-0.0190711	0.0965111	1.94583	0.55884
mhpE	-0.886266	-1.00412	-1.07483	0.400705	-0.287565	0.221567	1.70182	0.928694
ytjB	-1.26281	-0.826457	-1.0636	0.509866	-0.0581011	0.384178	1.65647	0.660454
ybeU	-1.31246	-1.15431	-0.425454	-0.102281	0.0421158	0.351537	1.65111	0.949751
ydeH	-1.27373	-1.1184	-0.447669	-0.0452302	0.0977413	0.103037	1.73044	0.953806
frlA	-0.881346	-1.38929	-0.748313	0.0377935	0.207109	0.110357	1.58582	1.07787
sfmD	-1.04341	-1.23278	-0.626803	0.107939	-0.142025	0.153387	1.57742	1.20626
umuC	-1.03418	-1.1001	-0.877147	0.0494462	0.130958	0.0662279	1.61135	1.15345
yafZ	-1.11812	-1.12169	-0.743857	0.00111393	0.0456696	0.195377	1.63542	1.10609
melB	-1.24375	-1.14459	-0.541678	-0.0180973	0.0473504	0.15643	1.54075	1.20359
yhaV	-1.14848	-1.23419	-0.543443	-0.0913691	0.190292	0.0911796	1.55056	1.18546
hyfH	-1.16861	-1.32467	-0.576684	0.221526	-0.0170404	0.354261	1.58655	0.924667
chbR	-1.23651	-1.43165	-0.487862	0.358357	-0.0408029	0.454155	1.24006	1.14426
srlE	-1.29178	-1.41047	-0.299896	0.352881	0.00529854	0.183329	1.41258	1.04805
cof	-0.920716	-1.51516	-0.599288	0.0900384	0.128765	0.204281	1.20729	1.40479
umuD	-1.05988	-1.31406	-0.773452	0.143689	0.0497931	0.355191	1.18602	1.4127
yidK	-1.15388	-1.35671	-0.635018	0.0347874	0.0913906	0.506481	1.28006	1.23289
nrfC	-1.12499	-0.617745	-1.22643	0.0199275	0.251808	-0.0525356	1.39672	1.35324
rusA	-1.2819	-0.955126	-0.746545	0.199021	0.2755	-0.0929922	1.73557	0.866479
ydfK	-1.37246	-0.468773	-0.985563	-0.0348902	0.18896	0.00932711	1.74486	0.918546
yfjS	-1.19086	-0.75134	-0.859038	-0.0614897	0.0578514	-0.070222	1.69661	1.17849
caiC	-1.52813	-0.62173	-0.606581	-0.3743	0.549773	0.0397654	1.61523	0.925967
intF	-1.41031	-0.686144	-0.741365	-0.178015	0.395023	-0.108262	1.54788	1.18119
gudP	-1.1932	-1.07743	-0.493328	-0.382822	0.453862	-0.0513061	1.5326	1.21161
hybB	-1.17522	-0.992781	-0.688993	-0.335674	0.378394	0.031679	1.5143	1.2683
aaeA	-1.341	-1.04145	-0.332131	-0.342505	0.391457	0.0400371	1.6921	0.933499
yafJ	-1.2261	-1.02966	-0.468027	-0.202341	0.372113	-0.206445	1.68464	1.07582
insD_7	-1.41037	-0.833925	-0.67252	-0.14219	0.0807023	0.234421	1.46417	1.27971
ycaQ	-1.43324	-0.830158	-0.877574	0.041119	0.298946	0.220412	1.3836	1.19689
recX	-1.45252	-0.644062	-0.701645	-0.0521122	0.293384	-0.204131	1.23774	1.52335
yihU	-1.37434	-0.869868	-0.66242	-0.308815	0.407825	0.124941	1.1999	1.48278
cmr	-0.664772	-1.27049	-1.00935	-0.496818	0.59434	0.760127	1.57714	0.509821
rpoB	-0.518645	-1.20887	-0.993851	-0.607471	0.53778	0.491318	1.75727	0.542475
ygfF	-0.653532	-1.23859	-0.847664	-0.33973	0.428819	0.50328	1.92869	0.218731
yeeR	-0.902906	-1.30989	-0.50894	-0.52522	0.373413	0.401088	1.77346	0.699004
ygjQ	-0.848017	-1.25245	-0.523335	-0.642955	0.302609	0.570329	1.8064	0.587417
phnC	-0.794965	-1.29753	-0.941165	0.00913743	0.639627	0.173613	1.78182	0.429464
uidC	-0.844039	-1.18578	-0.973664	-0.142883	0.74682	0.086908	1.73669	0.575949
sgbE	-0.928555	-1.14957	-1.12661	-0.0559716	0.813741	0.231062	1.53994	0.675965
yhjX	-1.04384	-1.04595	-0.992913	-0.115104	0.721304	0.0434621	1.62594	0.807104
torC	-1.08268	-1.02163	-0.781757	-0.158096	0.504816	0.0948575	1.8917	0.55279
ybcF	-0.969217	-1.01496	-0.79005	-0.157248	0.395502	0.0829123	2.00419	0.44887
ymcA	-0.810289	-1.06763	-0.737259	-0.29386	0.391234	-0.0104328	2.04659	0.481652
dcuC_2	-0.998021	-1.11472	-0.752467	-0.24677	0.300257	0.22732	1.86354	0.720861
torA	-1.03447	-1.08249	-0.702034	-0.352979	0.197382	0.391301	1.84477	0.738509
nfrA	-0.934444	-1.01359	-0.741468	-0.405268	0.340252	0.138984	1.9519	0.663637
yjeB	-0.846687	-1.09806	-0.873721	-0.183911	0.286838	0.112832	1.93306	0.669652
ynfG	-1.10008	-1.01566	-0.753362	-0.074997	0.139065	0.163184	1.89075	0.751101
narK	-1.03995	-1.21298	-0.754463	0.136618	0.44518	-0.0219887	1.80055	0.647043
ulaG	-0.892237	-1.25353	-0.879217	0.0191223	0.383666	0.0744548	1.75396	0.793777
yphD	-0.846066	-1.30644	-0.870554	0.11387	0.275492	0.290185	1.84273	0.500783
mutM	-0.789269	-0.990016	-1.23939	-0.229424	0.271818	0.659595	1.7132	0.603485
dnaJ	-0.882482	-0.985686	-1.18508	-0.156631	0.489564	0.403637	1.76439	0.552285
hslR	-0.885916	-0.92858	-1.24438	-0.141844	0.471702	0.442017	1.75637	0.530625
phoQ	-1.04003	-0.766885	-1.10467	-0.286207	0.340278	0.448175	1.84063	0.568709
acrD	-0.86891	-1.08478	-0.947847	-0.438784	0.373138	0.421467	1.73117	0.81454
cadA	-0.922964	-1.1195	-0.903695	-0.448957	0.433542	0.568422	1.69756	0.695595
insL_3	-0.914052	-0.897165	-1.02845	-0.453196	0.289295	0.42412	1.7928	0.786649
kduI	-1.04626	-0.892909	-0.981952	-0.299285	0.247343	0.415536	1.80313	0.754397
ydfU	-0.926321	-1.06912	-0.923283	-0.318648	0.343715	0.477403	1.83251	0.583746
yfjZ	-0.931856	-1.04989	-0.941298	-0.256718	0.239013	0.427863	1.83952	0.673368
fxsA	-1.05791	-1.03308	-0.976088	-0.345932	0.505282	0.583739	1.63351	0.690475
lnt	-0.973329	-1.00794	-1.0793	-0.453208	0.57589	0.61785	1.52178	0.798256
ypfI	-0.905471	-1.01026	-1.15074	-0.356354	0.506217	0.530012	1.5953	0.7913
fimE	-0.941153	-1.2372	-0.656494	-0.408841	0.627316	0.0295334	1.64355	0.943288
yfjR	-1.01086	-1.04292	-0.703378	-0.578878	0.594441	0.0945541	1.63571	1.01133
yjgZ	-0.96778	-0.838891	-0.852224	-0.776668	0.703335	0.232223	1.67223	0.827779
phnJ	-0.869981	-0.972743	-0.982085	-0.55235	0.80225	0.0922529	1.62435	0.858303
mokC	-0.959917	-1.08868	-0.914444	-0.520916	0.686869	0.348587	1.5364	0.912107
yjiC	-0.886624	-0.999211	-0.971065	-0.543233	0.599527	0.182954	1.59029	1.02736
dmsB	-1.07058	-0.932299	-0.767679	-0.473557	0.79731	0.165169	1.81357	0.46807
dacD	-1.16222	-0.855038	-0.815194	-0.510581	0.439248	0.448245	1.76824	0.687308
fkpB	-1.0425	-0.897098	-0.850652	-0.562141	0.571817	0.295441	1.77482	0.710319
ycgY	-1.06427	-1.04855	-0.848722	-0.397417	0.541116	0.345775	1.6952	0.776872
hofC	-1.12534	-0.932965	-0.728975	-0.41137	0.554356	0.108935	1.82865	0.706704
ydjK	-1.03875	-0.785782	-0.886969	-0.444275	0.554949	0.0616609	1.89568	0.643488
pitB	-0.934335	-0.931013	-0.744976	-0.635348	0.583855	0.0556449	1.83296	0.773214
yqjF	-0.952568	-1.06549	-0.736156	-0.548792	0.589914	0.194127	1.78672	0.732252
aroF	-1.06721	-0.974654	-0.925494	-0.725674	0.80159	0.948747	1.19303	0.749657
tyrA	-1.05001	-0.993678	-0.896718	-0.760592	0.77672	0.967364	1.17033	0.786588
yggR	-1.0527	-1.01649	-0.902687	-0.644038	0.819919	0.566443	1.38895	0.840611
yccR	-1.35124	-0.771643	-0.828887	-0.47929	0.29657	0.907853	1.48131	0.745321
yadH	-1.02494	-1.24837	-0.663733	-0.590808	0.491273	0.795385	1.44923	0.791972
aslA	-1.10413	-1.13357	-0.794973	-0.478456	0.42693	0.94219	1.43905	0.702962
ybcV	-1.1565	-1.09253	-0.801771	-0.470305	0.378715	1.07072	1.32659	0.745073
ycjD	-1.13745	-1.093	-0.873674	-0.475042	0.596373	0.823104	1.36029	0.799394
hyfC	-1.08709	-1.08066	-0.816927	-0.501735	0.30876	0.752602	1.46661	0.958442
insB_8	-1.13315	-1.02861	-0.881669	-0.441821	0.275152	0.906324	1.41126	0.892517
ynfA	-1.13848	-1.13422	-0.664202	-0.520783	0.298554	0.856611	1.49135	0.811171
citB	-1.42393	-1.20666	-0.522014	0.276323	0.233374	0.176531	1.3753	1.09108
yaiT	-1.55109	-1.18017	-0.366999	0.246449	0.491828	0.00962995	1.20514	1.14522
fepB	-1.54884	-1.17751	-0.339149	0.0340941	0.497299	0.218802	1.40552	0.90978
yjbM	-1.55368	-1.1383	-0.195708	-0.0998509	0.619075	0.0758867	1.48179	0.810789
yccM	-1.32803	-1.15609	-0.736142	0.0805996	0.798142	0.0210798	1.26438	1.05606
gspA	-1.16185	-1.39157	-0.513922	-0.0250333	0.510977	0.0927711	1.44752	1.0411
php	-1.28764	-1.35264	-0.517879	0.111616	0.38873	0.27241	1.47666	0.908748
ycdL	-1.30121	-1.28291	-0.340738	-0.258412	0.708155	0.104432	1.46433	0.906347
ydcQ	-1.3104	-1.3286	-0.528448	-0.0675998	0.645448	0.266499	1.31625	1.00685
yeaL	-1.37317	-1.28905	-0.375363	-0.260728	0.676027	0.353827	1.34485	0.923612
yeeU	-1.20016	-1.39078	-0.45743	-0.183013	0.543288	0.332957	1.49635	0.858786
chpA	-1.30019	-1.18287	-0.573263	-0.0841952	0.460543	0.249365	1.63145	0.799164
hyfR	-1.32467	-1.13568	-0.596363	-0.0777864	0.544505	0.251798	1.66924	0.668964
yeaM	-1.24527	-1.10919	-0.646506	-0.277764	0.618631	0.197211	1.59843	0.864459
ygbN	-1.1373	-1.13939	-0.795381	-0.180342	0.568129	0.199106	1.62516	0.860012
narH	-1.14859	-1.29047	-0.577197	-0.329551	0.670065	0.285696	1.50071	0.889335
fecB	-1.11369	-1.27	-0.687487	-0.260796	0.540645	0.365891	1.5581	0.867338
yliK	-1.12269	-1.26035	-0.749961	-0.226868	0.66472	0.363995	1.51607	0.815083
tdcF	-0.779299	-1.40274	-0.889782	-0.144022	0.645141	0.0453768	1.31593	1.20939
yaaY	-0.927486	-1.2788	-0.841714	-0.0897378	0.537692	-0.0086653	1.52349	1.08522
nanE	-0.697977	-1.61542	-0.777104	-0.0884835	0.495347	0.238718	1.20963	1.23529
ybaO	-0.770564	-1.52303	-0.916108	0.104883	0.382872	0.264981	1.20374	1.25322
hyfA	-0.896304	-1.03004	-1.32324	-0.114449	0.749706	0.338204	1.36696	0.909163
rem	-1.00943	-1.02979	-1.21122	-0.113393	0.80856	0.255018	1.34544	0.954813
prpE	-1.05294	-1.06012	-1.10682	-0.295003	0.689237	0.491671	1.2532	1.08078
ygfH	-1.07282	-0.924379	-1.06788	-0.387503	0.557596	0.339877	1.3592	1.19591
maoC	-1.15408	-1.12145	-0.932232	-0.221028	0.607623	0.431453	1.39712	0.992587
phnK	-1.17483	-1.12971	-0.891198	-0.265909	0.701033	0.404504	1.33277	1.02335
nikD	-1.03251	-1.16309	-0.994999	-0.171216	0.735917	0.212197	1.38327	1.03042
ygjE	-1.07982	-1.11658	-0.960352	-0.280294	0.791869	0.304801	1.42291	0.917466
kduD	-0.855775	-1.25436	-1.06635	-0.226556	0.741087	0.259772	1.24496	1.15722
yiaT	-0.984477	-1.25262	-1.0438	-0.208523	0.871169	0.458276	0.963714	1.19626
araB	-1.05446	-1.10619	-0.911431	-0.330185	0.664934	0.196285	1.18227	1.35878
cynT	-1.07248	-1.17622	-0.746629	-0.306399	0.713711	0.0181212	1.32418	1.24571
tfaD	-1.19825	-1.14716	-0.715235	-0.232219	0.534104	0.162554	1.31901	1.27721
rhaB	-0.858933	-1.26668	-0.7453	-0.484612	0.778721	0.023395	1.25999	1.29341
yeeS	-0.819179	-1.49392	-0.643717	-0.332736	0.8741	0.0467185	1.19792	1.17082
yghQ	-1.16915	-1.06698	-0.739169	-0.671053	0.721076	0.687018	1.09572	1.14255
yaeF	-1.19	-1.14824	-0.649511	-0.526568	0.842044	0.347952	1.29438	1.02994
sgcE	-0.85684	-1.20732	-0.875005	-0.617486	0.685071	0.429689	1.33475	1.10715
yhfW	-0.93188	-1.22567	-0.829052	-0.505878	0.610542	0.368161	1.35237	1.16141
eutA	-1.07529	-1.14252	-0.643579	-0.671888	0.605539	0.442765	1.34864	1.13633
yphF	-0.935207	-1.14644	-0.683093	-0.683093	0.584291	0.223155	1.34063	1.29975
frdC	-0.66801	-1.52485	-0.649209	-0.418901	0.300692	0.348634	1.23743	1.37421
fumB	-0.811071	-1.26089	-0.636946	-0.593415	0.267536	0.26028	1.33163	1.44288
kbaZ	-0.865237	-1.20448	-0.62059	-0.379204	0.132925	0.0220183	1.51274	1.40183
yiaK	-0.78778	-1.1155	-0.913825	-0.318893	0.104617	0.144951	1.46086	1.42557
hybO	-1.12174	-1.05583	-0.648178	-0.39528	0.140422	0.266436	1.40927	1.40491
hybA	-1.0864	-1.0688	-0.782623	-0.398014	0.265926	0.343174	1.34805	1.37869
sgcX	-1.02561	-1.08264	-0.753407	-0.402573	0.230829	0.232557	1.49158	1.30925
hybC	-1.15899	-1.1239	-0.77392	-0.208499	0.315003	0.309641	1.50677	1.13389
uidA	-1.17684	-1.04371	-0.787492	-0.254962	0.312736	0.23989	1.43306	1.27732
xdhD	-1.06138	-1.23839	-0.572013	-0.396743	0.361602	0.191539	1.3334	1.38199
ycaM	-1.15275	-1.17468	-0.726257	-0.360692	0.460613	0.404559	1.2088	1.34041
atoE	-0.94351	-1.15206	-0.903403	-0.40207	0.456214	0.295787	1.33856	1.31049
ycbC	-1.01213	-1.26029	-0.731816	-0.373376	0.481367	0.289893	1.30088	1.30547
gntU	-0.920686	-1.15151	-1.04484	-0.226455	0.334874	0.396078	1.33513	1.27742
uxaB	-0.965219	-1.10621	-0.923798	-0.447462	0.358646	0.456622	1.34716	1.28025
yfaT	-0.885182	-1.08366	-1.00127	-0.484486	0.346864	0.485422	1.38418	1.23813
ygfA	-0.821609	-1.08192	-0.999	-0.516299	0.335209	0.444171	1.5398	1.09964
yjfF	-1.0003	-1.16326	-0.796593	-0.464232	0.21121	0.616475	1.30478	1.29192
fecC	-1.14587	-0.965693	-0.761003	-0.257242	0.22323	0.128851	1.69284	1.08489
sgcA	-1.00154	-0.904357	-0.826609	-0.310451	0.121481	0.0394138	1.7801	1.10197
hyfD	-0.989824	-1.0034	-0.781678	-0.41516	0.168553	0.209277	1.72512	1.08711
yeaW	-1.05273	-0.949001	-0.80847	-0.403608	0.228781	0.168553	1.66086	1.15561
nikB	-1.03717	-0.934172	-0.855409	-0.385862	0.207888	0.15639	1.57715	1.27119
yehP	-1.02718	-0.957716	-0.897316	-0.244997	0.165722	0.129482	1.64854	1.18346
aaeB	-1.05481	-1.20041	-0.716301	-0.286793	0.305296	0.351401	1.65448	0.947131
ddpC	-0.980804	-1.25038	-0.749511	-0.192811	0.236278	0.241064	1.60011	1.09605
yaaW	-1.03623	-1.12655	-0.676727	-0.246385	0.283132	0.0210301	1.69813	1.0836
yjeM	-0.997647	-1.08706	-0.837877	-0.273551	0.353803	0.172046	1.73897	0.93132
hybF	-1.15508	-1.22454	-0.619553	-0.141164	0.092989	0.434696	1.58193	1.03072
insB_6	-1.14276	-1.0175	-0.74274	-0.25293	0.075705	0.307366	1.60844	1.16442
yehI	-1.31314	-0.975572	-0.675136	-0.1249	0.0911433	0.351071	1.65408	0.992451
ilvA	-1.02625	-1.12708	-0.749768	-0.379036	0.177514	0.457244	1.65968	0.987705
ilvD	-1.01725	-1.06834	-0.78527	-0.343583	0.0943414	0.460201	1.73673	0.92317
ilvE	-1.0587	-1.02961	-0.683888	-0.452393	0.058884	0.444948	1.70963	1.01113
yjiM	-1.08106	-1.08934	-0.726024	-0.453711	0.272916	0.524547	1.66619	0.886481
ispH	-0.682023	-1.15247	-0.854036	-0.696335	0.291746	0.446267	1.64373	1.00312
insL_1	-0.842927	-0.977923	-0.909314	-0.594323	0.263986	0.35815	1.74089	0.961466
insL_2	-0.863166	-1.0111	-0.884613	-0.596994	0.342853	0.399222	1.75455	0.859247
yadE	-0.786888	-1.15065	-0.743538	-0.624798	0.307216	0.419359	1.79806	0.781234
era	-1.04509	-0.991347	-0.692659	-0.676819	0.401679	0.394608	1.66884	0.940787
yfcQ	-1.14293	-0.765881	-0.856653	-0.52848	0.368758	0.162777	1.6221	1.14031
afuB	-1.04049	-0.920666	-0.793235	-0.539323	0.3099	0.221459	1.68882	1.07354
yjeN	-1.04688	-0.828174	-0.802444	-0.645922	0.389697	0.181716	1.68047	1.07153
afuC	-0.876375	-0.928028	-0.93264	-0.540629	0.208342	0.266452	1.68968	1.1132
gspO	-0.898131	-1.02736	-0.799576	-0.483058	0.250986	0.140981	1.73748	1.07868
ybgQ	-0.94352	-1.06457	-0.73601	-0.528501	0.349091	0.197782	1.73681	0.988912
ddpD	-0.93475	-1.15987	-0.675524	-0.54591	0.297258	0.287707	1.61658	1.1145
yjiO	-0.920175	-1.04963	-0.818919	-0.607433	0.297041	0.386762	1.57493	1.13743
insB_2	-0.91445	-1.43689	-0.711613	-0.261031	0.187306	0.688037	1.31975	1.12889
ydeP	-0.963234	-1.41596	-0.692237	-0.188502	0.165388	0.6213	1.43748	1.03577
yhdX	-0.730423	-1.41848	-0.67394	-0.56611	0.281129	0.604621	1.47753	1.02567
fhiA	-0.843625	-1.23401	-0.984164	-0.184653	0.105795	0.552397	1.51431	1.07395
ilvY	-0.882398	-1.3093	-0.902335	-0.15877	0.126224	0.556648	1.4257	1.14423
eutT	-0.828496	-1.20137	-0.920667	-0.321553	0.130925	0.415819	1.45065	1.27469
tnaB_1	-0.881945	-1.19154	-0.913353	-0.130399	0.0333709	0.342963	1.56563	1.17527
insO_2	-0.793726	-1.36198	-0.798939	-0.188982	0.063863	0.478321	1.63567	0.965765
cynX	-0.893481	-1.23183	-0.923871	-0.269462	0.263384	0.504482	1.57625	0.974522
xdhC	-0.892032	-1.18622	-0.856729	-0.396109	0.301547	0.425948	1.65147	0.952131
yfeO	-0.831644	-1.33439	-0.848809	-0.219044	0.304679	0.396607	1.65499	0.877608
ebgA	-0.931569	-1.13001	-1.0804	-0.159855	0.259076	0.518151	1.52689	0.997716
mhpT	-1.01334	-1.2044	-1.02302	-0.0894839	0.341006	0.57318	1.43658	0.979485
macB	-0.937442	-1.16995	-0.958978	-0.347816	0.341125	0.556903	1.50281	1.01334
ynfF	-0.888595	-1.12048	-1.08769	-0.293661	0.352803	0.547211	1.52862	0.961791
ytfH	-0.992234	-1.05977	-0.952923	-0.273038	0.196683	0.398784	1.58014	1.10236
mngA	-1.21302	-1.02954	-0.81208	-0.356772	0.275224	0.676167	1.47805	0.981971
insB_5	-1.25867	-1.01575	-0.785848	-0.333849	0.306412	0.538051	1.37785	1.1718
uvrD	-1.22398	-1.08045	-0.846305	-0.295644	0.338641	0.685862	1.29169	1.13019
yceP	-1.17011	-1.14059	-0.863332	-0.23556	0.336811	0.626953	1.34843	1.0974
ychG_2	-1.16446	-1.09831	-0.866375	-0.357596	0.383933	0.708147	1.34433	1.05033
emrD	-1.03922	-1.13901	-1.03637	-0.272278	0.437641	0.694238	1.29582	1.05918
gntK	-1.08019	-0.997437	-1.07854	-0.348617	0.396202	0.712337	1.2933	1.10295
yghB	-1.01036	-1.0454	-1.01737	-0.317963	0.193738	0.622881	1.36045	1.21402
insA_1	-1.11499	-1.00839	-1.05546	-0.21303	0.261832	0.680624	1.38115	1.06827
yibA	-1.16403	-1.05756	-0.963559	-0.165643	0.254552	0.626044	1.41263	1.05756
yijE	-1.23211	-1.2669	-0.590446	-0.200037	0.128526	0.750862	1.24757	1.16253
ycbG	-1.41326	-1.03363	-0.616115	-0.276886	0.251318	0.699975	1.38433	1.00427
yeaN	-1.30362	-1.11032	-0.683513	-0.197941	0.14227	0.732998	1.40414	1.01599
yhaO	-1.36919	-1.06264	-0.701985	-0.253745	0.248593	0.853974	1.27903	1.00596
yrdC	-1.26632	-1.08365	-0.847185	-0.151915	0.282661	0.74653	1.43674	0.883134
prmC	-1.17258	-0.898078	-0.943662	-0.35709	0.349201	0.49647	1.61101	0.914734
ilvM	-1.08927	-0.988639	-0.905943	-0.330609	0.318123	0.469691	1.70618	0.82047
rpoD	-1.06768	-0.991852	-1.00467	-0.280009	0.388232	0.421359	1.61953	0.915082
dinG	-1.28187	-0.901233	-0.901999	-0.337556	0.429077	0.536298	1.47985	0.977437
yccE	-1.25187	-0.873814	-0.970045	-0.282679	0.535286	0.33595	1.48385	1.02332
yfiE	-1.04642	-1.06161	-0.91347	-0.47917	0.412854	0.612277	1.46632	1.00923
agaS	-1.08846	-0.996844	-0.902943	-0.547949	0.640706	0.462064	1.46292	0.970506
yojL	-1.1148	-1.00712	-0.9003	-0.483369	0.514165	0.509858	1.45915	1.02241
fecA	-1.08173	-1.07489	-0.763975	-0.417335	0.39301	0.283545	1.5956	1.06576
hcaB	-1.06967	-1.17906	-0.740078	-0.446481	0.492885	0.38561	1.44919	1.1076
deaD	-1.12528	-1.16854	-0.813529	-0.325613	0.439627	0.519321	1.43328	1.04074
ytfL	-1.22563	-1.12635	-0.714055	-0.343649	0.499084	0.480613	1.50542	0.924574
insO_1	-1.10015	-1.22782	-0.856727	-0.0197885	0.412582	0.238953	1.45209	1.10086
yahF	-0.963647	-1.28405	-0.992775	-0.0752469	0.487892	0.37138	1.36658	1.08987
ydiD	-1.23014	-1.23296	-0.753321	-0.115679	0.519142	0.386535	1.32043	1.106
ygaY	-1.22561	-1.19317	-0.833529	-0.0465422	0.49363	0.358234	1.29895	1.14804
ygiT	-1.13672	-1.30797	-0.781306	-0.159905	0.480777	0.523742	1.29104	1.09034
sgcR	-1.16744	-1.25775	-0.796014	0.0910355	0.26728	0.385262	1.48788	0.989737
yehQ	-1.28376	-1.19617	-0.767552	0.0915472	0.231314	0.499666	1.41281	1.01214
hyfB	-1.18487	-1.16971	-0.836265	-0.0572161	0.276229	0.527829	1.52513	0.918869
ynbD	-1.11325	-1.28618	-0.821898	-0.0906955	0.364192	0.555921	1.44126	0.950658
xdhA	-1.00036	-1.37475	-0.814361	-0.0727321	0.308813	0.463816	1.36999	1.1196
hybE	-1.19588	-1.37697	-0.568024	-0.101277	0.342515	0.445811	1.31129	1.14253
yqeA	-1.16031	-1.34018	-0.6646	-0.0705908	0.266154	0.519235	1.41025	1.04004
mdlB	-0.878188	-1.37121	-0.918163	-0.248591	0.569219	0.490936	1.40535	0.950642
mntH	-0.962794	-1.278	-0.922069	-0.30115	0.518932	0.566909	1.3895	0.988666
thiD	-0.9189	-1.41526	-0.813441	-0.300207	0.619396	0.596899	1.40823	0.823284
hybD	-1.08755	-1.38412	-0.712231	-0.219604	0.389228	0.685521	1.24479	1.08397
dmsA	-1.08536	-1.30792	-0.685303	-0.296519	0.379628	0.579655	1.48682	0.928997
ycdG	-1.03582	-1.38227	-0.64353	-0.278206	0.412001	0.471316	1.46888	0.987623
yihV	-0.959337	-1.41589	-0.769277	-0.246613	0.470243	0.559076	1.40402	0.957788
yjhG	-1.09382	-1.31574	-0.76378	-0.255068	0.458496	0.622376	1.36211	0.985417
mdtH	-1.20009	-1.21323	-0.817548	-0.243894	0.582603	0.643022	1.32175	0.927386
nikA	-1.23414	-1.12321	-0.898567	-0.205228	0.524164	0.676698	1.32844	0.931847
relB	-1.04538	-1.24327	-0.962615	-0.189523	0.650328	0.516562	1.38579	0.888106
holB	-1.03144	-1.30106	-0.88008	-0.262369	0.60079	0.625335	1.36874	0.88008
rhsA	-1.01942	-1.2448	-0.996071	-0.22957	0.603937	0.669927	1.32881	0.887187
pphA	-1.1108	-1.27299	-0.917636	-0.122824	0.578097	0.674759	1.35172	0.81967
sapB	-1.11762	-1.31146	-0.855231	-0.105557	0.65804	0.531667	1.37612	0.82404
clcB	-1.15529	-1.26506	-0.71715	-0.331974	0.616523	0.574154	1.39843	0.880369
dcuC_1	-1.1279	-1.27612	-0.748722	-0.315546	0.549657	0.672601	1.40797	0.838058
ybjM	-1.21582	-1.24934	-0.670675	-0.31651	0.629326	0.648953	1.42653	0.747528
nirB	-1.06777	-1.362	-0.820998	-0.131296	0.583716	0.646991	1.42211	0.729249
yccC	-1.13452	-1.26273	-0.825213	-0.175218	0.610154	0.674257	1.47308	0.640188
nikE	-1.0404	-1.20623	-0.782447	-0.462517	0.699952	0.470473	1.50062	0.820554
ycaI	-1.17686	-1.09177	-0.78766	-0.404762	0.666724	0.512304	1.54597	0.736056
rluA	-1.00697	-1.17584	-0.917079	-0.306216	0.64403	0.420865	1.58052	0.760699
yfcC	-1.05053	-1.22562	-0.910463	-0.272639	0.760386	0.467738	1.43573	0.795404
rhsC	-1.06615	-1.23825	-0.87189	-0.192631	0.514008	0.503578	1.52964	0.821695
ydhK	-0.987758	-1.26846	-0.942404	-0.170768	0.54632	0.458063	1.49324	0.871768
hepA	-1.08493	-1.19125	-0.908601	-0.219806	0.584219	0.544026	1.52665	0.749692
hofB	-1.12685	-1.13612	-0.889308	-0.265971	0.553633	0.562899	1.54171	0.760008
ycjF	-1.03742	-1.16258	-0.929623	-0.245609	0.50397	0.517855	1.59874	0.754666
ulaA	-1.0789	-1.16298	-0.856659	-0.310079	0.45273	0.584871	1.56992	0.8011
ykfC	-0.971787	-1.2167	-0.894647	-0.331903	0.493455	0.519168	1.56583	0.836581
hyfG	-1.13326	-1.3488	-0.676724	-0.124176	0.385265	0.557692	1.50604	0.833966
narI	-1.02312	-1.3288	-0.737823	-0.175615	0.453722	0.459716	1.63927	0.712649
rnc	-1.12225	-1.2904	-0.683415	-0.107005	0.402294	0.354571	1.62148	0.824721
hcaC	-1.22551	-1.04012	-0.900177	-0.161496	0.463208	0.662306	1.60225	0.599547
chpB	-1.10223	-1.17568	-0.921079	-0.0866435	0.377087	0.556145	1.58153	0.770874
tdcE	-1.14078	-1.07107	-0.915573	-0.116625	0.264082	0.548271	1.64749	0.784202
ybhC	-1.22514	-1.15359	-0.70363	-0.151054	0.472413	0.489267	1.68696	0.584778
ybeD	-1.13186	-1.04434	-0.869827	-0.226536	0.4103	0.502625	1.73453	0.625105
pqiA	-1.04181	-1.20368	-0.844148	-0.203036	0.495157	0.505381	1.68665	0.605488
yeaX	-1.03669	-1.15294	-0.849936	-0.308721	0.49929	0.449742	1.67319	0.726066
yjdL	-1.01358	-1.25005	-1.03657	0.106326	0.303377	0.664639	1.50868	0.717186
yjjW	-1.10107	-1.17576	-1.04751	0.0503848	0.473194	0.697283	1.48935	0.61413
yeeY	-1.1652	-1.2727	-0.847892	-0.0152748	0.367458	0.767195	1.42459	0.741834
yidJ	-1.10302	-1.29948	-0.849265	0.0511607	0.263989	0.636437	1.50412	0.796059
ydfT	-1.32785	-1.17883	-0.735793	0.0213966	0.301315	0.768517	1.46932	0.681923
zupT	-1.25583	-1.23178	-0.699434	-0.0576298	0.39097	0.644707	1.55434	0.654657
rhtA	-1.33479	-0.844489	-0.51382	-0.319979	0.694832	1.19084	1.45879	-0.331382
sfmA	-1.11755	-1.24248	-0.250838	-0.305495	0.975047	1.19368	1.20929	-0.461659
yejH	-1.07147	-0.660393	-1.23895	0.0551904	0.659124	1.58278	0.933177	-0.259463
yiaJ	-1.01877	-1.11406	-1.01091	0.298498	0.4871	1.52736	1.00477	-0.173991
menC	-0.203826	-2.14045	0.184969	0.405123	1.12507	-0.0437701	0.921474	-0.248593
norR	-0.483276	-1.74424	0.0149044	-0.101065	1.32977	-0.323205	1.35591	-0.0487973
yhhQ	-0.748686	-1.93077	0.308527	-0.0411025	0.95784	-0.27627	1.11392	0.616535
insE_4	-0.683126	-1.35619	-0.433081	0.138937	1.05519	0.188604	1.71627	-0.626609
napB	-0.894723	-1.18908	0.117561	-0.284481	1.01498	0.648831	1.53189	-0.944978
ftsL	-0.811585	-1.6517	-0.22209	-0.518438	1.08907	0.543934	1.32368	0.247128
molR_3	-1.06469	-1.61541	-0.0327493	-0.326825	0.91364	0.881559	1.2398	0.00467862
nupG	-1.17499	-1.58028	0.303618	-0.451059	1.00239	0.485299	1.24836	0.166658
ygdE	-0.644217	-1.93286	0.0450387	-0.197431	0.750404	0.623235	1.36251	-0.00667684
menE	-0.690621	-1.34998	-0.527876	-0.253841	0.56946	0.674765	1.86903	-0.290937
yggJ	-0.414008	-1.72132	-0.434521	-0.233336	0.19586	0.999024	1.6081	0.000197509
eutP	-1.06875	-1.20759	-0.420849	-0.582826	1.65013	0.377463	0.96752	0.284905
nrfE	-1.04153	-1.38871	-0.524998	-0.313305	1.60887	0.474192	0.812901	0.37258
allC	-0.96715	-1.03631	-0.171818	-0.725092	1.36698	-0.396585	1.48801	0.441971
yhdY	-0.948844	-1.15899	-0.477606	-0.738697	1.37551	0.076417	1.34366	0.528551
ycjV	-0.854366	-1.42394	-0.646548	0.123152	1.524	0.0846669	1.21612	-0.023091
ybeT	-1.05037	-1.46912	-0.422241	-0.143074	1.04339	0.191928	1.51798	0.331512
yjjG	-0.805492	-1.50471	-0.806684	0.0415161	0.984666	0.332327	1.51504	0.243336
nirD	-1.1588	-1.17627	-0.350587	-0.0972033	1.11292	-0.202052	1.68085	0.19113
ygbT	-1.35698	-1.30031	0.069059	-0.327586	0.947344	0.0360054	1.50926	0.423207
gutM	-1.18974	-1.46445	-0.309435	0.430399	0.755052	-0.153352	1.55732	0.37421
ychQ	-1.34265	-1.1122	-0.405592	0.307573	0.673439	-0.411053	1.6225	0.667978
eutE	-0.847148	-1.48861	-0.24752	-0.205686	0.742562	-0.24752	1.74659	0.547334
nrdG	-0.77561	-1.66875	-0.491893	0.0590017	0.667149	0.0793581	1.63408	0.496664
yjjX	-1.03242	-1.65657	-0.163876	0.168864	0.442465	0.0605627	1.6181	0.562878
npr	-1.69854	-0.770107	-0.720338	0.256411	0.943279	1.06232	-0.031142	0.958122
ruvC	-1.65986	-0.528151	-0.993461	0.000277626	0.934702	1.27885	0.51253	0.45512
syd	-1.78786	-0.766669	-0.682263	0.395659	0.873735	1.24803	0.443397	0.275967
yiiR	-1.59555	-1.07118	-0.669285	0.534031	0.843184	1.26411	0.455554	0.239147
lit	-1.74081	-1.2498	-0.263567	0.641294	0.711438	0.694604	0.27935	0.927483
yfcN	-1.80767	-1.12286	-0.363654	0.427955	0.744758	0.678357	0.497956	0.94516
yebC	-1.72881	-1.13336	-0.353156	0.219269	0.797811	1.17577	0.589492	0.432985
ygdQ	-1.80024	-0.970216	-0.512407	0.113169	0.884988	0.874228	0.694234	0.716245
trpR	-1.46287	-1.28156	-0.598328	0.089329	1.18516	0.806615	0.615132	0.646531
murI	-1.6689	-1.04898	-0.614667	0.220128	1.20122	0.76782	0.603238	0.540148
yiiU	-1.6012	-1.25833	-0.508945	0.370354	1.07266	0.856298	0.510114	0.55904
hemD	-1.60415	-1.08931	-0.352658	0.0215271	0.481369	1.52729	0.375876	0.64006
plsX	-1.27378	-1.65114	-0.110064	0.305792	0.323663	1.38083	0.44464	0.580051
yecA	-1.21484	-1.59375	-0.325243	0.146978	0.591459	1.42746	0.504454	0.463474
yccK	-1.44887	-1.48616	-0.363785	0.417215	0.457377	1.15375	0.773649	0.496821
ygjV	-1.37646	-1.68637	-0.0766893	0.508363	0.483064	1.09025	0.617468	0.440371
yncN	-1.28245	-1.40961	-0.336864	0.020175	1.18911	1.29997	0.171795	0.347869
ygdH	-1.25135	-1.45322	-0.627777	0.916795	0.620711	1.23755	0.190492	0.366797
gmhB	-1.85596	-0.882934	-0.414523	0.766806	0.511714	1.2018	0.132419	0.540676
eutB	-1.61376	-1.26595	-0.491643	0.77509	0.479807	1.09458	0.521744	0.500127
fhuF	-1.61392	-1.25422	-0.529054	0.948151	0.695351	0.882379	0.407305	0.464007
psd	-1.73567	-1.16175	-0.373925	0.771474	0.790166	0.994392	0.487633	0.227678
yqgE	-1.6112	-1.42183	-0.136347	0.586069	0.500501	1.10929	0.305799	0.667709
exbD	-1.51247	-1.04017	-0.932766	1.02691	0.518871	0.760043	0.304058	0.875522
sbcD	-1.13671	-1.5669	-0.736255	1.13327	0.540607	0.828931	0.405598	0.531454
dtd	-1.15739	-1.38716	-1.03155	0.919031	0.690872	0.847018	0.616542	0.502641
ydjZ	-1.04137	-1.46936	-1.07341	0.787323	0.6294	0.807921	0.755281	0.604225
clpS	-1.52073	-1.06797	-0.920179	0.754277	0.45979	1.08075	0.69288	0.521188
tonB	-1.42257	-1.31767	-0.79732	0.870778	0.479443	0.848341	0.674573	0.664429
yrhB	-1.33841	-1.26828	-0.897999	0.807533	0.238087	0.776676	1.02353	0.65886
ygjP	-1.88356	-1.16374	0.0547454	0.373461	0.36262	0.685672	1.0304	0.540407
yihD	-1.8723	-1.25378	0.179374	0.419588	0.729636	0.588657	0.833335	0.375483
leuO	-1.49822	-1.62989	0.0287537	0.464601	0.381366	0.920121	0.641664	0.691605
ddlA	-1.54885	-1.62703	0.0932755	0.524544	0.622652	0.765897	0.661657	0.507852
proY	-1.63996	-1.53534	0.089815	0.540841	0.53717	0.786312	0.621135	0.600029
rhtB	-1.45954	-1.72813	0.198885	0.473084	0.508361	0.689958	0.752895	0.564483
rimL	-1.45653	-1.73231	0.309454	0.530645	0.295984	0.612174	0.732694	0.707881
yceB	-1.5538	-1.53739	-0.0492801	0.731597	0.237295	0.859275	0.776025	0.536278
hlyE	-1.71171	-1.3631	-0.153877	0.646827	0.652273	0.390819	0.832023	0.706743
ybgT	-1.48051	-1.48344	-0.392485	0.666239	0.734318	0.393471	0.999084	0.563331
yiaU	-1.44701	-1.43765	-0.503265	0.885053	0.836696	0.376523	0.899092	0.390562
cyaA	-1.74655	-1.22633	-0.214553	0.547433	0.828185	0.81022	0.858572	0.143028
gntR	-1.6128	-1.39956	-0.249949	0.640977	0.512132	0.869201	0.92014	0.319864
tehA	-1.45854	-1.56931	-0.286775	0.653924	0.495555	0.852536	0.838256	0.474352
ybaQ	-1.61425	-1.47823	-0.102116	0.565722	0.472592	0.69643	0.958663	0.501184
pdxH	-1.59674	-1.40949	-0.305613	0.680913	0.601732	0.962892	0.689598	0.376714
slyA	-1.62525	-1.41815	-0.27429	0.587132	0.603988	0.893996	0.659891	0.572683
brnQ	-1.55049	-1.46797	-0.282296	0.4542	0.8378	0.776934	0.828983	0.402847
ybaN	-1.62877	-1.37834	-0.31201	0.493849	0.665265	0.850064	0.858558	0.451381
yfjO	-1.68782	-1.31177	-0.346023	0.583588	0.716418	0.742627	0.819664	0.48332
yheM	-1.62877	-1.27544	-0.489951	0.404096	0.650516	0.917574	0.854008	0.567963
hmp	-1.55538	-1.50864	-0.220843	0.640658	0.849353	0.612632	0.74926	0.432965
yliA	-1.47409	-1.61626	-0.204857	0.678568	0.650933	0.635661	0.669478	0.660569
hipA	-1.50919	-1.32056	-0.516728	0.593627	0.296747	0.811196	1.1831	0.461799
yahD	-1.51413	-1.42807	-0.402625	0.70156	0.386602	0.675924	1.07145	0.509289
ycdS	-1.58091	-1.34348	-0.355755	0.587649	0.508504	0.555991	1.22081	0.407199
alsK	-1.6047	-1.33806	-0.353711	0.509773	0.337824	0.538431	1.05677	0.853671
ygbA	-1.4235	-1.49266	-0.502569	0.648412	0.359234	0.778489	0.865565	0.767022
ynfM	-1.5842	-1.46277	-0.262705	0.473684	0.527955	0.726383	0.787777	0.793882
cydD	-1.06409	-1.84218	-0.271514	1.01925	0.287366	0.668708	0.83447	0.367982
relA	-0.996302	-1.88227	-0.320372	0.835639	0.397566	0.404658	1.02876	0.532316
gmk	-1.34859	-1.64154	-0.172646	0.712429	0.392703	0.645483	1.14273	0.269429
yjdJ	-1.31402	-1.63904	-0.134837	0.578012	0.156426	0.957988	1.09695	0.298525
ypdA	-1.49532	-1.54102	-0.0648401	0.940607	0.312203	0.323628	1.02287	0.501866
ytfE	-1.48707	-1.32595	-0.478074	1.03253	0.282571	0.334646	1.13446	0.506893
tpr	-1.05869	-1.30202	-1.1064	0.439484	1.22356	0.407676	0.444786	0.951598
rpmI	-1.35707	-1.16593	-1.05466	0.607908	1.00418	0.583612	0.609731	0.772231
yjfY	-1.25269	-1.42455	-0.841865	0.685517	0.926522	0.434343	0.522813	0.94991
yjjZ	-1.32565	-1.24421	-0.967593	0.89645	0.85621	0.272372	0.799345	0.713082
ycbQ	-1.41617	-1.56449	-0.362717	0.774399	0.884688	0.466351	0.416911	0.80102
yciV	-1.31416	-1.51748	-0.595493	0.814667	0.94753	0.350653	0.47345	0.840837
ytfK	-1.16932	-1.6635	-0.460029	0.647609	1.23883	0.610572	0.326381	0.469457
insF_5	-0.521693	-1.73054	-0.302211	0.49468	1.21053	0.970789	0.639876	-0.761436
insF_3	-0.709407	-1.56492	-0.462962	0.0580903	1.67758	0.881917	0.399591	-0.27989
insF_4	-0.970821	-1.54741	-0.583847	0.259757	1.54451	0.596424	0.716386	-0.0149952
csgB	-0.882635	-1.56985	-0.607751	0.90411	1.47106	0.19972	0.594866	-0.109524
yecH	-1.17645	-1.50479	-0.203681	0.763525	1.3946	0.582104	0.537584	-0.392892
yhcH	-1.05631	-1.58391	-0.335172	0.722441	1.26369	0.929627	0.402828	-0.343202
ydgK	-1.72723	-0.767126	-0.603586	0.999786	0.805502	0.477142	1.0617	-0.24619
tatE	-1.52678	-1.12119	-0.680654	0.89991	0.734522	0.854727	0.92783	-0.0883687
trmC	-1.50374	-1.23326	-0.603916	1.00298	0.754862	0.882648	0.705878	-0.00545732
rsmB	-1.72012	-0.99491	-0.645717	1.0444	0.748015	0.74912	0.618622	0.200586
yciN	-1.66316	-0.866776	-0.859372	0.973683	0.697114	0.76857	0.841137	0.108804
yedV	-1.6958	-1.05123	-0.453667	1.28138	0.554903	0.582203	0.721735	0.0604764
pepP	-1.94826	-0.825518	-0.372001	0.790465	0.516356	0.823085	0.8949	0.120975
yaiB	-1.82955	-0.963725	-0.385517	0.829668	0.747337	0.792836	0.836167	-0.0272177
yfjN	-2.09246	-0.773442	-0.137031	0.627602	0.708842	0.63367	0.810832	0.22199
blr	-1.46728	-1.25926	-0.2508	0.891952	1.06573	0.428532	0.969627	-0.378503
insA_7	-1.51185	-1.30978	-0.13437	0.863231	1.11148	0.533007	0.778943	-0.330658
fmt	-1.6186	-1.15292	-0.578393	0.779028	1.07048	0.530087	0.810588	0.159734
ydgT	-1.54091	-1.15333	-0.486861	0.633472	1.22589	0.438787	0.97626	-0.0933114
yqjA	-1.47384	-1.25015	-0.260915	0.661335	1.06265	-0.00792481	1.27677	-0.00792481
hypD	-1.56264	-0.908741	-0.688175	1.45458	0.720299	0.773122	0.0608874	0.150673
hypC	-1.34161	-1.22325	-0.578349	1.46372	0.765406	0.727029	0.311315	-0.124258
gadW	-1.32674	-1.27189	-0.0942871	1.58818	0.82641	0.499874	0.147565	-0.369111
menF	-1.28294	-1.2644	-0.327619	1.50233	0.814147	0.642345	0.353081	-0.436948
sfsA	-1.02009	-1.2418	-0.832514	1.5746	0.560887	0.590791	0.690773	-0.322638
ftsI	-1.16706	-1.5166	-0.578239	1.23056	0.568734	0.944384	0.523362	-0.0051328
ybgA	-0.982158	-1.63383	-0.618566	1.14512	0.745115	0.705166	0.775288	-0.136136
mpl	-1.10736	-1.48473	-0.293725	1.4394	0.276007	1.00589	0.475735	-0.311212
yoaC	-1.14166	-1.64357	-0.162148	1.34137	0.490421	0.793509	0.512953	-0.190866
paaX	-1.00228	-1.7156	0.135389	0.125286	0.602177	1.09119	1.14778	-0.383939
insF_1	-1.1734	-1.58455	-0.364933	0.457354	0.799399	1.0447	1.00324	-0.181819
rob	-1.35389	-1.4549	-0.428488	0.666408	0.59943	0.993756	1.03554	-0.0578511
yecE	-1.19949	-1.35295	-0.522289	0.535216	0.765399	1.08065	1.11401	-0.420542
ygeP	-0.829898	-1.7187	-0.573397	0.971569	0.196103	1.00139	1.01929	-0.066362
idi	-0.886712	-1.8732	-0.00902271	1.05331	0.579939	0.531818	0.931956	-0.328087
narX	-1.21664	-1.73749	0.0865139	0.811051	0.809024	0.482729	0.954945	-0.190128
yedR	-1.09825	-1.75103	-0.0701617	0.875494	1.0334	0.615831	0.661725	-0.267022
yhfG	-0.997574	-1.59829	-0.46245	1.08216	0.707226	0.395819	1.15328	-0.280163
yibI	-1.01867	-1.65178	-0.377839	1.29501	0.780287	0.232108	0.858783	-0.117904
ybhE	-0.676996	-1.68486	-0.599634	0.960855	1.16151	0.820934	0.454594	-0.436403
talA	-0.706123	-1.83222	-0.54059	1.12256	0.96771	0.556261	0.571602	-0.139196
tktB	-0.47023	-1.91099	-0.488424	1.16896	0.9428	0.445133	0.595715	-0.282969
yiaG	-0.911381	-1.82078	-0.290243	1.13634	0.951312	0.593625	0.4561	-0.114979
ldcC	-0.683838	-1.84708	-0.678173	0.921224	0.757989	0.705465	0.859432	-0.0350159
yhhT	-0.807096	-1.73227	-0.803764	0.822784	0.692282	0.793907	0.953285	0.0808692
dbpA	-0.315179	-1.85129	-0.819057	0.906777	0.868017	0.705838	0.800697	-0.295799
yjdC	-0.471592	-1.84905	-0.83557	0.702713	0.924671	0.873949	0.735716	-0.0808332
cca	-0.63251	-1.88399	-0.602501	0.737054	1.20894	0.711611	0.417605	0.043791
ecnB	-0.7989	-1.99889	-0.262691	0.679299	1.0351	0.591191	0.632267	0.122631
yccJ	-0.764401	-1.91016	-0.431841	0.670002	0.997302	0.75221	0.752874	-0.0659898
adhP	-0.428398	-2.10564	-0.502302	0.757932	0.822372	0.732122	0.56401	0.159906
ybhO	-0.402058	-2.0473	-0.623368	0.734396	0.800191	0.796079	0.662246	0.0798134
mlrA	-0.677641	-2.00242	-0.383314	0.880597	0.824578	0.791269	0.549933	0.0169949
yncB	-0.549027	-2.00011	-0.476274	0.81539	0.834473	0.859519	0.603095	-0.0870651
ydeI	-0.845434	-1.78798	-0.769129	0.954723	0.823491	0.618503	0.599816	0.406012
yfhK	-1.03873	-1.68758	-0.698222	0.865796	0.757655	0.478813	0.942656	0.37961
ybjR	-0.870799	-1.95593	-0.308219	0.922977	0.588057	0.563917	0.878973	0.18102
fbaB	-0.894562	-1.97655	-0.136205	0.857886	0.839155	0.657727	0.633518	0.0190308
osmC	-1.0695	-1.89951	-0.100176	0.861916	0.861847	0.574726	0.635347	0.135358
chaC	-1.03363	-1.9079	-0.284229	0.765711	0.755592	0.74612	0.616304	0.342032
yghY	-1.14335	-1.81067	-0.226355	0.818281	0.682222	0.758317	0.798644	0.122909
menD	-1.12571	-1.58462	-0.558959	0.933995	0.853716	0.50504	1.02506	-0.0485272
mfd	-1.24239	-1.57902	-0.389426	1.00892	0.78418	0.574936	0.917864	-0.0750758
ydeA	-1.29439	-1.61574	-0.279565	0.891352	0.743166	0.606636	0.959618	-0.0110828
kdpE	-1.13648	-1.66411	-0.569724	0.664578	1.08668	0.632565	0.722677	0.263816
ltaE	-1.02355	-1.78964	-0.519244	0.67993	0.90888	0.736833	0.769677	0.237114
ydcK	-1.02246	-1.82554	-0.456967	0.687195	0.743395	0.722853	0.894167	0.257359
erfK	-1.17572	-1.60944	-0.579682	0.759344	0.94509	0.549949	0.944172	0.166288
yeaB	-1.20623	-1.67642	-0.460405	0.684731	0.826946	0.694459	0.915888	0.221025
ygaU	-1.1542	-1.67624	-0.486314	0.888049	0.927562	0.696841	0.688067	0.116236
yieF	-1.19286	-1.72951	-0.291178	0.755555	0.945961	0.68183	0.75116	0.0790445
wrbA	-0.825424	-1.78095	-0.555917	0.934271	0.933678	0.656457	0.797925	-0.160041
poxB	-0.919493	-1.78757	-0.500697	0.829846	0.974729	0.523009	0.892189	-0.0120132
sodC	-0.958249	-1.80862	-0.471262	0.821622	0.908705	0.492398	0.913777	0.101625
cpxR	-0.947643	-1.81414	-0.450369	0.679562	0.873602	0.704701	0.941424	0.012864
[truncated: 2,250 more rows]

## Sheet: Figure 1 - Panel D
	log2 fold change
Gene	18 h	24 h	32 h	42 h	48 h	60 h	72 h
alaE	-0.28	4.04	5.44	5.77	5.8	5.92	5.66
argO	-0.71	-0.25	-0.26	-0.25	-0.33	-0.18	-0.35
cydC	0.00532	0.24	0.13	0.09	0.07	0.01	0.02
cydD	-0.1	0.05	0.21	0.05	0.07	0.01	-0.00702
eamA	-0.15	-0.43	-0.56	-0.8	-0.65	-1	-0.88
eamB	-0.33	0.45	0.74	1.03	1.01	0.84	0.89
emrE	0.2	-0.13	-0.17	-0.2	-0.05	0.22	0.13
leuE	-0.17	1.46	2	2.25	2.31	2.28	2.4
lysO	0.24	-0.41	-0.85	-1.07	-1.11	-1.21	-1.05
rhtA	0.17	0.09	0.08	0.21	0.26	0.21	-0.04
rhtB	-0.13	0.71	0.76	0.73	0.75	0.69	0.68
rhtC	-0.34	0.43	0.26	0.37	0.43	0.31	0.39
yahN	0.09	-0.05	-0.07	0.39	0.52	1.11	0.9
ybjE	0.24	-0.41	-0.85	-1.07	-1.11	-1.21	-1.05
yddG	-0.23	-0.05	-0.61	-0.66	-0.66	-0.86	-0.71
yedA	0.17	-0.15	0.01	0.02	0.08	0.17	0.19
ygaH	0.53	0.02	-0.02	-0.06	-0.09	-0.13	0.02
ygaZ	0.37	0.28	0.16	0.08	0.07	0.0037	0.07

## Sheet: Figure 1 - Panel E
	z-score
Amino acid	18 h	24 h	32 h	42 h	48 h	60 h	72 h
alanine	-1.09293	-0.14403	1.86392	0.381256	-0.0169447	0.0847234	-1.07599
tryptophan	1.2571	1.23503	0.462545	-0.296697	-0.996348	-0.49975	-1.16188
asparagine	1.42332	1.23381	0.0778323	-0.41488	-0.490682	-0.490682	-1.33872
tyrosine	1.58596	1.13159	-0.101932	-0.106981	-0.876042	-0.613518	-1.01908
homoserine	1.40452	1.3119	0.229469	-0.534602	-0.753404	-0.7152	-0.942685
glutamine	1.62661	1.04057	0.166023	-0.392968	-0.681479	-0.681479	-1.07728
phenylalanine	1.56864	1.05304	0.365562	-0.569213	-0.836565	-0.684747	-0.896719
valine	1.58552	1.10975	0.184644	-0.473505	-0.910949	-0.592447	-0.903019
leucine/isoleucine	1.57443	0.918491	0.547205	-0.665663	-0.905761	-0.600069	-0.868632
arginine	1.77792	0.858466	0.193906	-0.634518	-0.752864	-0.557138	-0.885776
glutamic acid	1.62011	1.17183	-0.0039893	-0.555154	-0.685964	-0.657303	-0.889527
proline	1.61507	1.19341	-0.0310457	-0.637595	-0.830588	-0.574346	-0.734903
histidine	1.62121	1.19425	-0.074877	-0.557791	-0.819861	-0.563681	-0.799249
aspartic acid	1.73048	1.09452	-0.192461	-0.512113	-0.701227	-0.640979	-0.778212
serine	1.78913	1.04182	-0.30893	-0.542463	-0.676978	-0.558343	-0.744235
glycine	1.88187	0.900162	-0.305931	-0.53967	-0.645787	-0.563044	-0.727596
lysine	1.85598	0.910213	-0.184887	-0.566512	-0.627351	-0.605228	-0.782214
