# Supplementary material for: Spatial alanine metabolism determines local growth dynamics of Escherichia coli colonies
Source: eLife. 2021 Nov 9;10:e70794. doi: 10.7554/eLife.70794 (PMC8579308; doi:10.7554/eLife.70794)
Supplement: Figure 2—source data 1. [file elife-70794-fig2-data1.xlsx]

## Sheet: Figure 2 - Panel A
	distance to colony surface (µm)	fold change in fluorescence (horizontal)				distance to colony surface (µm)	fold change in fluorescence (vertical)				distance to colony surface (µm)	oxygen (µM)
		Replicate 1	Replicate 2	Replicate 3			Replicate 1	Replicate 2	Replicate 3			Replicate 1	Replicate 2	Replicate 3	Replicate 4	Replicate 5	Replicate 6	Replicate 7	Replicate 8	Replicate 9	Replicate 10
	0	1	1	1		0	1	1	1		0	287.992	283.322	284.376	288.355	288.571	284.069	276.717	280.796	281.04	282.043
	2.50875	0.926464	0.867814	0.969111		6	0.918926	0.92889	0.938442		5	286.871	282.729	283.558	287.137	289.212	283.231	278.892	279.981	278.322	282.814
	7.52625	0.83144	0.718617	0.851306		12	0.72462	0.803201	0.847701		10	206.727	214.298	230.005	268.48	272.378	267.704	231.956	271.085	244.612	275.277
	12.5437	0.742088	0.591002	0.734071		18	0.493488	0.716392	0.736334		15	178.531	191.408	208.478	253.152	253.097	222.835	199.593	262.049	232.015	261.556
	17.5612	0.660757	0.497965	0.640231		24	0.439842	0.677352	0.644		20	154.624	166.52	185.85	235.667	224.314	197.298	181.806	231.362	208.89	251.308
	22.5788	0.591548	0.434761	0.564197		30	0.417559	0.647645	0.613498		25	129.142	147.171	163.409	209.83	199.353	178.487	164.989	199.911	191.342	209.269
	27.5962	0.538596	0.392906	0.507561		36	0.40761	0.625211	0.583955		30	109.094	122.691	144.203	188.024	171.606	152.661	144.797	184.13	164.738	188.152
	32.6138	0.500062	0.36468	0.463578		42	0.379166	0.607618	0.57033		35	84.1458	103.445	117.848	158.469	150.977	132.968	126.665	159.412	147.849	168.605
	37.6312	0.470328	0.34587	0.42919		48	0.335517	0.597141	0.562833		40	64.125	82.5264	99.9094	138.957	123.059	110.939	102.243	141.929	121.136	146.215
	42.6488	0.448138	0.33179	0.403367		54	0.308446	0.579741	0.544388		45	44.8352	69.344	78.6564	112.485	103.736	93.5366	87.6966	121.535	103.627	126.181
	47.6662	0.429114	0.32199	0.384008		60	0.301685	0.560106	0.516351		50	31.7906	51.9562	63.848	94.1842	81.5512	80.9616	69.6516	105.258	83.1606	104.084
	52.6838	0.413001	0.312503	0.367613		66	0.29835	0.545837	0.510648		55	18.502	39.0114	43.248	73.6418	66.2081	65.7908	56.1398	85.2736	69.2214	84.473
	57.7012	0.401495	0.306261	0.354598		72	0.294313	0.548796	0.509755		60	10.1044	26.9738	32.562	60.2808	48.2227	54.1828	40.9312	69.5872	53.5506	65.9126
	62.7188	0.393053	0.300333	0.343642		78	0.290627	0.542726	0.511817		65	6.4472	17.5782	19.528	43.8062	36.1527	39.9572	29.6046	52.1672	44.0678	54.6866
	67.7363	0.383993	0.295995	0.334121		84	0.286129	0.548302	0.50957		70	2.0232	7.8716	13.0394	33.2008	22.1062	30.2606	18.4324	38.2112	32.143	43.9784
	72.7537	0.377409	0.292372	0.327167		90	0.279282	0.551301	0.507885		75	2.227	4.4092	4.5446	18.9704	11.574	22.386	11.5524	25.1344	21.6992	34.9576
	77.7712	0.371761	0.290241	0.321648		96	0.276408	0.548809	0.513499		80	-0.7504	1.2768	-0.143	12.0962	5.4768	11.1954	4.141	16.0084	13.5208	26.463
	82.7888	0.36762	0.288677	0.317149		102	0.27382	0.54903	0.512969		85	0.8188	-1.1346	-3.2024	5.9388	1.06816	5.4882	0.0684	6.6042	7.5988	18.3532
	87.8063	0.362729	0.287902	0.313377							90	0.6246	-2.1442	-5.4326	0.4806	-0.929	2.184	-3.0252	1.9846	2.185	9.442
	92.8238	0.359353	0.287105	0.311476							95	-1.4224	-2.3448	-5.7138	-2.0294	-2.3075	-3.2956	-5.9454	-2.0768	0.6104	6.165
	97.8413	0.35689	0.286937	0.309966							100	0.2956	-2.8672	-7.1818	-3.2484	-3.5988	-5.6318	-7.029	-3.5366	-3.4104	0.8788
	102.859	0.355179	0.286783	0.308503
	107.876	0.354079	0.287497	0.308946

## Sheet: Figure 2 - Panel B (insert)
time (h)	fluorescent fraction
	Replicate 1	Replicate 2	Replicate 3
12	1	1	1
18	0.670471	0.645579	0.631219
24	0.32036	0.322708	0.314628
32	0.162307	0.170153	0.179462
42	0.163522	0.202486	0.151872
48	0.134594	0.1469	0.1437
60	0.153883	0.176394	0.222385
72	0.0956112	0.141114	0.132726

## Sheet: Figure 2 - Panel D
Biosynthesis	log2 fold change
Gene	18 h	24 h	32 h	42 h	48 h	60 h	72 h
sufS	-0.9	0.03	0.14	0.06	0.03	-0.00431	0.00861
ilvE	0.1	0.49	0.71	1.12	1.36	1.9	1.63
alr	0.13	0.14	0.16	0.09	0.15	-0.05	0.14
alaA	0.22	-0.56	-0.95	-0.78	-0.75	-0.66	-0.58
alaC	-0.41	-0.6	-0.2	-0.42	-0.43	-0.32	-0.54
iscS	-0.78	-0.58	-0.76	-0.82	-0.78	-0.79	-0.56
avtA	0.16	-0.55	-1.21	-1.43	-1.35	-1.48	-1.36
alsB	0.43	0.14	-0.12	-0.34	-0.72	-0.26	-0.39
Transport	log2 fold change
Gene	18 h	24 h	32 h	42 h	48 h	60 h	72 h
livG	0.17	-0.93	-1.86	-2.44	-2.36	-2.7	-2.55
yaaJ	-0.05	0.22	0.29	0.28	0.4	0.49	0.49
cycA	-0.19	0.14	0.00463	0.01	0.13	-0.09	0.14
alaE	-0.28	4.04	5.44	5.77	5.8	5.92	5.66
Degradation	log2 fold change
Gene	18 h	24 h	32 h	42 h	48 h	60 h	72 h
dadA	-0.43	1.58	1.85	2.11	2.17	2.14	2.55
dadX	-0.3	1.43	1.66	1.84	1.88	1.83	2.3

## Sheet: Figure 2 - Panel E
Biosynthesis
Gene	log2 fold change inner/outer region
sufS	-0.21
ilvE	0.2
alr	-0.31
alaA	-0.19
alaC	-0.19
iscS	0.4
avtA	-0.48
alsB	0.89
Transport
Gene	log2 fold change inner/outer region
livG	-0.62
yaaJ	0.61
cycA	-0.63
alaE	0.93
Transport
Gene	log2 fold change inner/outer region
dadA	-2.29
dadX	-2.58
