# Supplementary material for: Spatial alanine metabolism determines local growth dynamics of Escherichia coli colonies
Source: eLife. 2021 Nov 9;10:e70794. doi: 10.7554/eLife.70794 (PMC8579308; doi:10.7554/eLife.70794)
Supplement: Figure 3—source data 1. [file elife-70794-fig3-data1.xlsx]

## Sheet: Figure 3 - Panel A
Values correspond to secreted alanine in µM
glc	+	+	-	-	+
NH4+	+	-	+	-	+
O2	+	+	+	+	-
Replicate 1	0.0627	0.0595	0.0627	0.071	43.3956
Replicate 2	0.0593	0.0261	0.0168	0.0338	30.9016
Replicate 3	0.0548	0.0755	0.0259	0.102	7.6768

## Sheet: Figure 3 - Panel B
	OD at 600 nm
time (h)	glucose		no carbon		alanine
	Mean	SD	Mean	SD	Mean	SD
0	-0.00487789	0.00560083	-0.00603074	0.00776357	-0.00259904	0.00785331
0.17	-0.00556423	0.00444845	-0.00671707	0.00795528	0.00014629	0.0125235
0.33	-0.00556423	0.00444845	-0.0053444	0.00682359	0.00014629	0.0125235
0.5	-0.00556423	0.00444845	-0.0053444	0.00682359	0.00014629	0.0125235
0.67	-0.00419156	0.00487471	-0.00465807	0.00597293	0.00014629	0.0125235
0.83	-0.00350522	0.0043569	-0.0053444	0.00644325	0.000832623	0.0121394
1	-0.00281889	0.00368721	-0.0053444	0.00644325	0.000832623	0.0121394
1.17	-0.00281889	0.00368721	-0.00397174	0.00714058	0.000832623	0.0121394
1.33	-0.00213254	0.00487474	-0.0053444	0.00644325	0.00014629	0.0109886
1.5	-0.00213254	0.00487474	-0.00397174	0.00714058	0.00014629	0.0129904
1.67	-0.00144621	0.00435693	-0.00397174	0.00525516	0.000832623	0.0107478
1.83	-0.00144621	0.00435693	-0.00397174	0.00525516	0.000832623	0.0107478
2	-0.000759873	0.00368724	-0.00397174	0.00525516	0.00151896	0.0118626
2.17	-0.000759873	0.00368724	-0.0032854	0.00473117	0.00151896	0.0118626
2.33	0.0019855	0.00319821	-0.0032854	0.00473117	0.00151896	0.0118626
2.5	0.0019855	0.00319821	-0.0032854	0.00473117	0.00151896	0.0118626
2.67	0.00335813	0.00368723	-0.00259907	0.00590505	0.00289162	0.0127874
2.83	0.0026718	0.00250094	-0.0032854	0.00473117	0.00220532	0.0117004
3	0.00335813	0.00368723	-0.00191274	0.00708389	0.00151896	0.0118626
3.17	0.0047308	0.00311261	-0.00054007	0.00590505	0.00220532	0.0117004
3.33	0.0047308	0.00311261	-0.0012264	0.00644325	0.00220532	0.0117004
3.5	0.00541713	0.00412666	-0.0032854	0.00473117	0.00220532	0.0117004
3.67	0.0088488	0.00311261	-0.0012264	0.00473117	0.00289162	0.0127874
3.83	0.0088488	0.00311261	-0.00191274	0.00356716	0.00289162	0.0127874
4	0.0102215	0.00413355	-0.0012264	0.00548239	0.00289165	0.0116579
4.17	0.0115941	0.00346036	-0.00191274	0.00451634	0.00357798	0.0106353
4.33	0.0136531	0.00346036	-0.00191274	0.00451634	0.00357798	0.0106353
4.5	0.0143395	0.00413355	-0.00054007	0.00446961	0.00289165	0.0116579
4.67	0.0157121	0.00530341	-0.00054007	0.00652244	0.00357796	0.0126929
4.83	0.0177711	0.00346036	-0.00191274	0.00451634	0.00357798	0.0106353
5	0.0191438	0.00500247	-0.0012264	0.0034251	0.00357796	0.0126929
5.17	0.0218891	0.00392402	-0.00122638	0.00486247	0.00289165	0.0116579
5.33	0.0239481	0.00392402	-0.000540043	0.00368299	0.00495064	0.0116579
5.5	0.0260071	0.00598243	-0.000540043	0.00368299	0.00357798	0.0106353
5.67	0.0287525	0.00497489	0.00014629	0.00451634	0.00426429	0.0117004
5.83	0.0314978	0.00704668	0.000832623	0.00548239	0.00495064	0.0116579
6	0.0335568	0.00811159	-0.000540043	0.00368299	0.00426433	0.010655
6.17	0.0363021	0.00804114	0.00014629	0.00655455	0.00495064	0.0116579
6.33	0.0390475	0.00835238	-0.00122638	0.00486247	0.00495064	0.0116579
6.5	0.0438518	0.0095089	0.00014629	0.00451634	0.00495064	0.0116579
6.67	0.0486561	0.0104715	0.000832623	0.00548239	0.00495064	0.0116579
6.83	0.0527741	0.012298	-0.000540043	0.00368299	0.00495064	0.0116579
7	0.0575785	0.013483	0.00014629	0.00451634	0.00563697	0.0117362
7.17	0.0637555	0.0152266	-0.00054007	0.00446961	0.00563697	0.0117362
7.33	0.0692461	0.0176041	-0.000540043	0.0056471	0.00495064	0.0116579
7.5	0.0747368	0.0199816	-0.00122638	0.00486247	0.00563697	0.0117362
7.67	0.0829728	0.0199816	-0.000540043	0.00368299	0.00563697	0.0117362
7.83	0.0905225	0.0241642	-0.0012264	0.0034251	0.00563697	0.0117362
8	0.100131	0.0265397	-0.000540043	0.00368299	0.00563697	0.0117362
8.17	0.108367	0.030244	-0.000540043	0.0056471	0.00563697	0.0117362
8.33	0.119348	0.0349776	0.00014629	0.00655455	0.0063233	0.0119331
8.5	0.131016	0.0375727	-0.00122638	0.00486247	0.00563697	0.0117362
8.67	0.145429	0.0430137	-0.00191274	0.00451634	0.0063233	0.0119331
8.83	0.160528	0.0477243	-0.00054007	0.00446961	0.0063233	0.0119331
9	0.179059	0.0550747	-0.00054007	0.00652244	0.00700964	0.0128365
9.17	0.196904	0.0628689	-0.00191274	0.00451634	0.00700964	0.0128365
9.33	0.216808	0.0671371	-0.0012264	0.00548239	0.0063233	0.0119331
9.5	0.240143	0.0772818	-0.00191274	0.00451634	0.0063233	0.0119331
9.67	0.264165	0.0850763	-0.0012264	0.0034251	0.00700964	0.0128365
9.83	0.293677	0.0971374	-0.0012264	0.0034251	0.00632333	0.0114781
10	0.325935	0.108773	-0.0012264	0.00548239	0.00769597	0.0130709
10.17	0.360251	0.118848	-0.00191274	0.00451634	0.00769597	0.0130709
10.33	0.398	0.129352	-0.0012264	0.0034251	0.00769597	0.0130709
10.5	0.440552	0.144146	-0.0012264	0.0034251	0.00769597	0.0130709
10.67	0.487223	0.159704	-0.00122638	0.00486247	0.00700964	0.0122427
10.83	0.540071	0.175292	-0.00054007	0.00590505	0.00769597	0.0130709
11	0.59635	0.191264	-0.00191274	0.00557225	0.00769597	0.0130709
11.17	0.655375	0.204918	-0.00191274	0.00451634	0.00769597	0.0130709
11.33	0.721263	0.21673	-0.00191274	0.00451634	0.00495064	0.0101955
11.5	0.790582	0.222536	-0.0012264	0.0034251	0.00495064	0.0101955
11.67	0.86402	0.223076	-0.00259907	0.00446961	0.0063233	0.011383
11.83	0.940889	0.219281	-0.00191274	0.00557225	0.0063233	0.011383
12	1.0205	0.21428	-0.00191274	0.00557225	0.00563697	0.0108858
12.17	1.10835	0.20815	-0.00191274	0.00451634	0.00700964	0.0120639
12.33	1.19895	0.203667	-0.00054007	0.00652244	0.00700964	0.0120639
12.5	1.28817	0.193865	-0.00191274	0.00557225	0.0063233	0.0116567
12.67	1.37534	0.184672	-0.00259907	0.00406747	0.0063233	0.0097103
12.83	1.46113	0.177441	-0.00191274	0.00451634	0.0063233	0.0116567
13	1.54418	0.168258	-0.0012264	0.0034251	0.0063233	0.0116567
13.17	1.62242	0.164515	-0.00191274	0.00356716	0.0063233	0.0116567
13.33	1.70478	0.163874	-0.00191274	0.00557225	0.0063233	0.0116567
13.5	1.78851	0.156644	-0.00191274	0.00451634	0.0063233	0.0116567
13.67	1.87499	0.151229	-0.00191274	0.00451634	0.00700964	0.0105002
13.83	1.96284	0.142904	-0.0012264	0.00473117	0.00769597	0.0113598
14	2.04726	0.131929	-0.0012264	0.0034251	0.0083823	0.0116567
14.17	2.13031	0.122132	-0.0012264	0.0034251	0.00769597	0.0113598
14.33	2.20992	0.105424	-0.0012264	0.00548239	0.0083823	0.0122745
14.5	2.28473	0.0915196	-0.000540043	0.00368299	0.0083823	0.0136362
14.67	2.3568	0.078063	-0.00191274	0.00451634	0.0083823	0.0122745
14.83	2.42474	0.067168	-0.00054007	0.00242727	0.0083823	0.0122745
15	2.48788	0.0551566	0.00014629	0.00451634	0.0083823	0.0122745
15.17	2.54485	0.0469297	-0.0012264	0.0034251	0.0083823	0.0122745
15.33	2.58878	0.0337046	-0.00259907	0.00446961	0.00975497	0.0121684
15.5	2.63201	0.0258943	-0.00191274	0.00356716	0.00975497	0.0121684
15.67	2.66839	0.023827	-0.00259907	0.00446961	0.0104413	0.0131881
15.83	2.69653	0.0231607	-0.00259907	0.00446961	0.00975497	0.0121684
16	2.71712	0.0280926	-0.00191274	0.00356716	0.0104413	0.0131881
16.17	2.72742	0.0379434	-0.00191274	0.00356716	0.0104413	0.0131881
16.33	2.73359	0.0449887	-0.00191274	0.00356716	0.0104413	0.0131881
16.5	2.7281	0.0560361	-0.00259907	0.00446961	0.0104413	0.0131881
16.67	2.72124	0.0640448	-0.00191274	0.00356716	0.0104413	0.0131881
16.83	2.713	0.0708653	-0.00191274	0.00451634	0.011814	0.015301
17	2.70477	0.0689796	-0.00191274	0.00356716	0.0125003	0.0152471
17.17	2.70271	0.0787606	-0.00259907	0.00446961	0.011814	0.015301
17.33	2.70202	0.0869551	-0.00259907	0.00446961	0.0125003	0.0152471
17.5	2.70133	0.0980202	-0.00191274	0.00356716	0.0125003	0.0152471
17.67	2.69996	0.108914	-0.00191274	0.00356716	0.0125003	0.0152471
17.83	2.70133	0.116911	-0.00259907	0.00446961	0.0131866	0.016291
18	2.69928	0.12587	-0.00259907	0.00446961	0.0145593	0.017306
18.17	2.70133	0.133252	-0.00259907	0.00406747	0.0145593	0.017306
18.33	2.70065	0.142294	-0.00191274	0.00451634	0.0145593	0.017306
18.5	2.69996	0.147885	-0.00191274	0.00356716	0.0145593	0.017306
18.67	2.69928	0.15353	-0.00191274	0.00356716	0.0145593	0.017306
18.83	2.6979	0.15804	-0.00191274	0.00356716	0.0166183	0.0184315
19	2.69722	0.162087	-0.00191274	0.00356716	0.015932	0.0194075
19.17	2.69516	0.165473	-0.00191274	0.00356716	0.0166183	0.0184315
19.33	2.69378	0.168364	-0.00191274	0.00356716	0.0166183	0.0204808
19.5	2.69378	0.171799	-0.00191274	0.00356716	0.0166183	0.0204808
19.67	2.69241	0.171066	-0.00328533	0.00137304	0.0152457	0.0218439
19.83	2.69378	0.171552	-0.00259904	0.00242732	0.015932	0.0214468
20	2.6931	0.172143	-0.00328533	0.00137304	0.0166183	0.0206706
20.17	2.69173	0.17691	-0.00054007	0.00446961	0.0207363	0.0217349
20.33	2.69173	0.176946	-0.00191274	0.00356716	0.02005	0.0219666
20.5	2.69241	0.179944	-0.0012264	0.0034251	0.0207363	0.0231046
20.67	2.69104	0.179465	-0.0012264	0.0034251	0.0214226	0.0242475
20.83	2.68967	0.178827	-0.00191274	0.00356716	0.0214226	0.0242475
21	2.68898	0.179571	-0.0012264	0.0034251	0.022109	0.023979
21.17	2.68829	0.180226	-0.0012264	0.0034251	0.0227953	0.0265455
21.33	2.68761	0.179182	-0.00191274	0.00451634	0.0227953	0.0265455
21.5	2.68761	0.179182	-0.00054007	0.00446961	0.024168	0.0273874
21.67	2.68486	0.179854	-0.0012264	0.0034251	0.0248543	0.0285321
21.83	2.68418	0.180367	-0.0012264	0.0034251	0.0248543	0.0285321
22	2.68486	0.177997	-0.00054007	0.00446961	0.026227	0.0308316
22.17	2.68418	0.176811	-0.0012264	0.0034251	0.0269133	0.0319856
22.33	2.68555	0.175481	-0.0012264	0.0034251	0.0282859	0.0308316
22.5	2.68486	0.174295	-0.0012264	0.0034251	0.0296586	0.0311772
22.67	2.68349	0.173638	-0.0012264	0.0034251	0.0289723	0.033506
22.83	2.6828	0.172451	-0.0012264	0.0034251	0.0310313	0.033506
23	2.6828	0.170612	-0.0012264	0.0034251	0.0310313	0.0350814
23.17	2.68212	0.171264	-0.0012264	0.0034251	0.0324039	0.0358412
23.33	2.68212	0.171153	-0.0012264	0.0034251	0.0330903	0.0370109
23.5	2.68349	0.170215	-0.0012264	0.0034251	0.0337766	0.0381817
23.67	2.68349	0.170078	-0.00191274	0.00356716	0.0344629	0.0393536
23.83	2.68349	0.171922	-0.0012264	0.0034251	0.0351493	0.0405264
24	2.6828	0.170612	-0.0012264	0.0034251	0.0372083	0.0421412
24.17	2.6828	0.172451	-0.0012264	0.0034251	0.0378946	0.0433202
24.33	2.68349	0.171922	-0.0012264	0.0034251	0.0392673	0.0437933
24.5	2.6828	0.172586	-0.0012264	0.00473117	0.0413263	0.0456796
24.67	2.68486	0.174295	-0.0012264	0.00473117	0.0426989	0.0480408
24.83	2.6828	0.176143	-0.00191274	0.00356716	0.0433853	0.049222
25	2.68418	0.176811	-0.00191274	0.00356716	0.0447579	0.04971
25.17	2.68555	0.179182	-0.00191274	0.00356716	0.0454443	0.0527676
25.33	2.68486	0.179701	-0.00191274	0.00356716	0.0468169	0.0551328
25.5	2.68624	0.182073	-0.00054007	0.00406747	0.0495623	0.0563158
25.67	2.68692	0.183259	-0.0012264	0.00288065	0.0509349	0.0586825
25.83	2.68486	0.183259	-0.0012264	0.00288065	0.0523076	0.0610501
26	2.68555	0.186295	-0.0012264	0.00288065	0.0543666	0.0627448
26.17	2.68692	0.186817	-0.0012264	0.00288065	0.0564256	0.0663026
26.33	2.68761	0.189853	-0.0012264	0.00288065	0.0591709	0.0692096
26.5	2.68761	0.191562	-0.0012264	0.00288065	0.0612299	0.0710477
26.67	2.68967	0.195121	-0.0012264	0.00288065	0.0626026	0.0751467
26.83	2.69104	0.19934	-0.0012264	0.00288065	0.0646616	0.0769807
27	2.69173	0.198681	-0.0012264	0.00288065	0.0680933	0.0810848
27.17	2.69447	0.203427	-0.00191274	0.00356716	0.0701523	0.0829153
27.33	2.6931	0.206457	-0.0012264	0.00288065	0.0735839	0.0870237
27.5	2.69653	0.210677	-0.0012264	0.00288065	0.0749566	0.0893995
27.67	2.69859	0.214235	-0.00191274	0.00356716	0.0777019	0.0941512
27.83	2.69996	0.216608	-0.0012264	0.0034251	0.0804473	0.0989033
28	2.70271	0.221352	-0.0012264	0.0034251	0.0845653	0.104289
28.17	2.70408	0.225573	-0.0012264	0.0034251	0.0886833	0.109596
28.33	2.70683	0.23203	-0.0012264	0.0034251	0.0914286	0.114306
28.5	2.71026	0.234403	-0.0012264	0.0034251	0.0962329	0.119102
28.67	2.71232	0.241654	-0.0012264	0.0034251	0.0989783	0.123855
28.83	2.71506	0.246398	-0.00054007	0.00242727	0.103783	0.12857
29	2.71712	0.25339	-0.0012264	0.0034251	0.107214	0.134514
29.17	2.72192	0.259977	-0.00054007	0.00446961	0.112019	0.142835
29.33	2.72536	0.267752	-0.0012264	0.0034251	0.116137	0.148197
29.5	2.72742	0.274871	-0.0012264	0.0034251	0.122314	0.157099
29.67	2.73291	0.282526	-0.0012264	0.0034251	0.127804	0.166609
29.83	2.73634	0.286738	-0.0012264	0.0034251	0.133295	0.172553
30	2.73977	0.294397	-0.0012264	0.0034251	0.138786	0.182063
30.17	2.74251	0.304542	-0.0012264	0.0034251	0.149081	0.185751
30.33	2.74801	0.312205	-0.0012264	0.0034251	0.154571	0.193512
30.5	2.75212	0.321162	-0.00054007	0.00446961	0.161435	0.203651
30.67	2.75761	0.332391	-0.0012264	0.0034251	0.162807	0.218322
30.83	2.76242	0.338971	-0.0012264	0.0034251	0.171043	0.227232
31	2.76585	0.34847	-0.0012264	0.0034251	0.177907	0.239119
31.17	2.77134	0.35797	-0.0012264	0.0034251	0.185456	0.250418
31.33	2.7782	0.368111	-0.0012264	0.0034251	0.193692	0.261116
31.5	2.78232	0.377066	-0.00191274	0.00356716	0.202615	0.273004
31.67	2.78713	0.385378	-0.0012264	0.0034251	0.209478	0.284891
31.83	2.79399	0.397252	-0.00191274	0.00356716	0.219087	0.297986
32	2.79948	0.406851	-0.0012264	0.0034251	0.225264	0.306916
32.17	2.80428	0.416995	-0.00054007	0.00242727	0.236245	0.311827
32.33	2.81183	0.424661	-0.0012264	0.0034251	0.239677	0.324745
32.5	2.81595	0.43545	-0.0012264	0.0034251	0.245854	0.333676
32.67	2.82076	0.445594	-0.0012264	0.0034251	0.249972	0.339044
32.83	2.82556	0.453904	-0.00054007	0.00242727	0.252717	0.343763
33	2.83448	0.465885	-0.0012264	0.0034251	0.256835	0.347364
33.17	2.83723	0.470633	-0.00191274	0.00356716	0.262326	0.351545
33.33	2.84135	0.479482	-0.00259907	0.00446961	0.266444	0.356872
33.5	2.84752	0.484991	-0.00191274	0.00356716	0.271248	0.356299
33.67	2.84958	0.488552	-0.00191274	0.00356716	0.273993	0.357539
33.83	2.85164	0.494076	-0.0012264	0.0034251	0.275366	0.359916
34	2.85301	0.496325	-0.00191274	0.00356716	0.279484	0.359916
34.17	2.8537	0.499352	-0.0012264	0.00473117	0.281543	0.361728
34.33	2.85507	0.500008	-0.00191274	0.00356716	0.282916	0.362355
34.5	2.85713	0.505412	-0.00191274	0.00356716	0.282916	0.358865
34.67	2.864	0.517276	-0.00191274	0.00356716	0.284288	0.354114
34.83	2.86468	0.522022	-0.00191274	0.00356716	0.284288	0.350551
35	2.864	0.520836	-0.0012264	0.00288065	0.283602	0.345889
35.17	2.864	0.520966	-0.00191274	0.00356716	0.284975	0.342971
35.33	2.86331	0.516221	-0.00191274	0.00356716	0.285661	0.338869
35.5	2.85919	0.514511	-0.00259907	0.00446961	0.288406	0.333185
35.67	2.8585	0.511617	-0.00191274	0.00356716	0.290465	0.329772
35.83	2.8585	0.50806	-0.00191274	0.00356716	0.292524	0.324362
36	2.86468	0.517026	-0.00191274	0.00356716	0.294583	0.320961
36.17	2.86331	0.518363	-0.00191274	0.00356716	0.294583	0.319267
36.33	2.86194	0.515993	-0.00191274	0.00356716	0.297329	0.313719
36.5	2.85919	0.513274	-0.00191274	0.00356716	0.298701	0.310864
36.67	2.8585	0.508368	-0.00191274	0.00356716	0.30076	0.305651
36.83	2.8585	0.504981	-0.0012264	0.0034251	0.303506	0.303757
37	2.85713	0.502789	-0.0012264	0.0034251	0.306937	0.299298
37.17	2.85301	0.497553	-0.00191274	0.00356716	0.30831	0.294861
37.33	2.85233	0.49637	-0.0012264	0.0034251	0.312428	0.291626
37.5	2.85027	0.491139	-0.00191274	0.00356716	0.314487	0.286492
37.67	2.84958	0.488279	-0.0012264	0.0034251	0.319291	0.282878
37.83	2.84821	0.485913	-0.00191274	0.00356716	0.320664	0.280483
38	2.84478	0.483752	-0.00191274	0.00356716	0.323409	0.27502
38.17	2.84478	0.482085	-0.00191274	0.00356716	0.330273	0.270015
38.33	2.84341	0.478057	-0.00191274	0.00356716	0.329586	0.268021
38.5	2.84203	0.477357	-0.00191274	0.00356716	0.333704	0.263846
38.67	2.84066	0.475216	-0.00191274	0.00356716	0.340568	0.258047
38.83	2.84066	0.471905	-0.00191274	0.00356716	0.343313	0.255203
39	2.83929	0.469543	-0.00191274	0.00356716	0.347431	0.249361
39.17	2.83791	0.467182	-0.0012264	0.0034251	0.353608	0.24507
39.33	2.83654	0.463173	-0.00191274	0.00356716	0.359785	0.24012
39.5	2.83448	0.459632	-0.00191274	0.00356716	0.366648	0.234529
39.67	2.83448	0.457988	-0.00191274	0.00356716	0.372139	0.230805
39.83	2.83174	0.457069	-0.00191274	0.00356716	0.379002	0.225576
40	2.83037	0.454981	-0.00191274	0.00356716	0.386552	0.220514
40.17	2.82968	0.451899	-0.00191274	0.00356716	0.394102	0.216936
40.33	2.83105	0.45072	-0.00191274	0.00356716	0.403024	0.212587
40.5	2.82899	0.449091	-0.0012264	0.0034251	0.411946	0.207595
40.67	2.82762	0.447314	-0.00191274	0.00356716	0.420182	0.20301
40.83	2.82625	0.444962	-0.00191274	0.00356716	0.429791	0.199179
41	2.82487	0.44261	-0.00191274	0.00356716	0.4394	0.196059
41.17	2.82556	0.440566	-0.00191274	0.00356716	0.448322	0.192488
41.33	2.82282	0.439709	-0.0012264	0.0034251	0.455872	0.189551
41.5	2.82144	0.435765	-0.0012264	0.0034251	0.46548	0.187029
41.67	2.82076	0.436188	-0.00191274	0.00356716	0.475089	0.18494
41.83	2.82076	0.431411	-0.00191274	0.00356716	0.485384	0.180085
42	2.82007	0.431827	-0.00191274	0.00356716	0.496365	0.180205
42.17	2.81938	0.429068	-0.0012264	0.0034251	0.503915	0.176066
42.33	2.81938	0.425552	-0.00191274	0.00356716	0.510092	0.169065
42.5	2.81801	0.423565	-0.00191274	0.00356716	0.516269	0.16218
42.67	2.81732	0.421194	-0.0012264	0.00473117	0.523132	0.155918
42.83	2.81595	0.418857	-0.0012264	0.00288065	0.529996	0.148099
43	2.81527	0.418074	-0.00191274	0.00356716	0.536859	0.140139
43.17	2.81389	0.41574	-0.00191274	0.00356716	0.543722	0.132256
43.33	2.81321	0.413022	-0.00191274	0.00356716	0.549213	0.119397
43.5	2.81183	0.411098	-0.0012264	0.00473117	0.553331	0.106958
43.67	2.81115	0.406862	-0.0012264	0.0034251	0.560194	0.0953506
43.83	2.81183	0.406496	-0.00191274	0.00356716	0.567058	0.0798502
44	2.81046	0.404612	-0.00191274	0.00356716	0.573235	0.0655371
44.17	2.81046	0.399618	0.000146263	0.00356716	0.580098	0.0508288
44.33	2.80978	0.396952	-0.00191274	0.00356716	0.586961	0.036738
44.5	2.80909	0.396265	-0.0012264	0.0034251	0.594511	0.0220548
44.67	2.80772	0.392951	-0.00191274	0.00356716	0.603433	0.0147056
44.83	2.8084	0.392127	-0.00191274	0.00356716	0.60961	0.0196241
45	2.8084	0.389678	-0.00054007	0.00590505	0.610297	0.0253403
45.17	2.80772	0.38905	-0.0012264	0.0034251	0.613728	0.0315087
45.33	2.80703	0.384457	-0.00191274	0.00356716	0.61716	0.0382753
45.5	2.80634	0.382407	-0.00191274	0.00356716	0.622651	0.0473624
45.67	2.80703	0.379254	-0.00191274	0.00356716	0.625396	0.0569513
45.83	2.80703	0.375831	-0.00054007	0.00446961	0.630887	0.0643617
46	2.80428	0.372469	-0.00191274	0.00356716	0.631573	0.0725844
46.17	2.80634	0.371073	-0.0012264	0.00473117	0.631573	0.0725844
46.33	2.80497	0.369431	-0.00191274	0.00356716	0.629514	0.0706753
46.5	2.80428	0.367569	-0.00191274	0.00356716	0.627455	0.0690575
46.67	2.80497	0.363955	-0.00191274	0.00356716	0.623337	0.0671428
46.83	2.80566	0.363063	-0.00191274	0.00356716	0.621278	0.0636141
47	2.80428	0.360823	-0.00191274	0.00356716	0.619905	0.061264
47.17	2.80428	0.356857	-0.00191274	0.00356716	0.616474	0.0586207
47.33	2.80428	0.355549	-0.0012264	0.00473117	0.615787	0.0574417
47.5	2.80428	0.352954	-0.00191274	0.00356716	0.613728	0.0555464
47.67	2.80497	0.351493	-0.00191274	0.00356716	0.612356	0.0531852
47.83	2.8036	0.350055	-0.00191274	0.00356716	0.608924	0.0527298
48	2.80497	0.347695	-0.0012264	0.0034251	0.608924	0.0508256
48.17	2.8036	0.347103	-0.00191274	0.00356716	0.606179	0.0496465
48.33	2.80291	0.342738	-0.0012264	0.00473117	0.60412	0.0477525
48.5	2.80223	0.342479	-0.00191274	0.00356716	0.603433	0.0484678
48.67	2.80154	0.340188	-0.00191274	0.00356716	0.601374	0.0465714
48.83	2.80154	0.33899	-0.00191274	0.00356716	0.600002	0.0442104
49	2.80085	0.338774	-0.00191274	0.00356716	0.600002	0.0442104
49.17	2.80154	0.337501	-0.00191274	0.00356716	0.59657	0.0435063
49.33	2.80223	0.336253	-0.00191274	0.00356716	0.59657	0.0435063
49.5	2.80085	0.334117	-0.00191274	0.00356716	0.594511	0.0416385
49.67	2.79879	0.332062	-0.00191274	0.00356716	0.591766	0.0404536
49.83	2.79879	0.329784	-0.00191274	0.00356716	0.591766	0.0404536
50	2.79742	0.330847	-0.00191274	0.00356716	0.590393	0.0380844
50.17	2.79605	0.326667	-0.0012264	0.00473117	0.589707	0.0386028
50.33	2.7933	0.325606	-0.00191274	0.00356716	0.587648	0.0369002
50.5	2.7933	0.324486	-0.00191274	0.00356716	0.586275	0.0362296
50.67	2.79193	0.32443	-0.0012264	0.00473117	0.584902	0.0374161
50.83	2.79056	0.323429	-0.00191274	0.00356716	0.584216	0.0362296
51	2.79056	0.322321	-0.00191274	0.00356716	0.58353	0.0350432
51.17	2.78781	0.320316	-0.00191274	0.00356716	0.582843	0.033857
51.33	2.78644	0.319316	-0.00191274	0.00356716	0.582157	0.032671
51.5	2.78507	0.319261	-0.0012264	0.0034251	0.580784	0.0337824
51.67	2.78438	0.317259	-0.0012264	0.00473117	0.578725	0.033857
51.83	2.78301	0.315147	0.00014629	0.00451634	0.578039	0.032671
52	2.78301	0.314043	-0.00191274	0.00356716	0.576666	0.0320222
52.17	2.78164	0.313999	-0.00191274	0.00356716	0.57598	0.0325937
52.33	2.78507	0.312789	-0.00191274	0.00356716	0.575294	0.0314049
52.5	2.78781	0.312808	-0.00191274	0.00356716	0.575294	0.0314049
52.67	2.78781	0.310749	-0.00191274	0.00356716	0.573921	0.0290275
52.83	2.78781	0.309753	-0.00191274	0.00356716	0.57598	0.0343981
53	2.78507	0.307671	-0.00191274	0.00356716	0.571176	0.0296465
53.17	2.78438	0.305664	-0.00191274	0.00356716	0.570489	0.0302162
53.33	2.78301	0.305612	-0.00191274	0.00356716	0.569803	0.0290275
53.5	2.78164	0.303577	-0.00191274	0.00356716	0.569117	0.0296329
53.67	2.78026	0.302536	-0.00191274	0.00356716	0.569117	0.0296329
53.83	2.7782	0.302536	-0.00191274	0.00356716	0.56843	0.0284446
54	2.77752	0.302514	-0.00191274	0.00356716	0.571176	0.0331979
54.17	2.77477	0.300438	-0.00191274	0.00356716	0.565685	0.0272564
54.33	2.77409	0.299417	-0.00191274	0.00356716	0.564999	0.0296329
54.5	2.77203	0.299417	-0.00191274	0.00356716	0.563626	0.0272564
54.67	2.77065	0.297333	-0.00191274	0.00356716	0.56294	0.0260682
54.83	2.77065	0.296321	-0.00191274	0.00356716	0.562253	0.0248801
55	2.76791	0.295269	-0.00191274	0.00356716	0.562253	0.0248801
55.17	2.76722	0.295285	-0.00191274	0.00356716	0.562253	0.0248801
55.33	2.76585	0.294249	-0.0012264	0.0034251	0.560194	0.0250338
55.5	2.76242	0.29218	-0.00191274	0.00356716	0.558822	0.0243432
55.67	2.76173	0.292182	-0.00191274	0.00356716	0.558135	0.0248801
55.83	2.76173	0.291151	-0.00191274	0.00356716	0.557449	0.023692
56	2.75899	0.291151	-0.00191274	0.00356716	0.557449	0.023692
56.17	2.75899	0.287033	-0.00191274	0.00356716	0.557449	0.023692
56.33	2.75624	0.289096	-0.00191274	0.00356716	0.557449	0.023692
56.5	2.75555	0.288064	-0.00191274	0.00356716	0.556076	0.0231581
56.67	2.75281	0.288071	-0.00191274	0.00356716	0.554017	0.0231581
56.83	2.75418	0.287037	-0.00191274	0.00356716	0.554704	0.0226739
57	2.75144	0.286005	-0.00191274	0.00356716	0.553331	0.023692
57.17	2.75075	0.286012	-0.00191274	0.00356716	0.552645	0.022504
57.33	2.74869	0.283953	-0.00191274	0.00356716	0.552645	0.022504
57.5	2.74801	0.283965	-0.00191274	0.00356716	0.552645	0.022504
57.67	2.74595	0.281906	-0.00191274	0.00356716	0.551958	0.0231581
57.83	2.74526	0.281923	-0.00191274	0.00356716	0.550586	0.0207891
58	2.74457	0.280885	-0.00191274	0.00356716	0.549899	0.0213161
58.17	2.74389	0.279847	-0.00191274	0.00356716	0.549213	0.0219734
58.33	2.74183	0.279847	-0.00191274	0.00356716	0.548527	0.0207891
58.5	2.74046	0.278826	-0.0012264	0.00473117	0.54784	0.0196054
58.67	2.73977	0.278846	-0.00191274	0.00356716	0.54784	0.0196054
58.83	2.7384	0.277828	-0.00191274	0.00356716	0.547154	0.0201283
59	2.73702	0.276812	-0.00191274	0.00356716	0.547154	0.0201283
59.17	2.73634	0.274784	-0.00191274	0.00356716	0.545095	0.0184224
59.33	2.73496	0.274754	-0.00191274	0.00356716	0.545781	0.0177758
59.5	2.73496	0.274754	-0.0012264	0.0034251	0.545781	0.0196054
59.67	2.73291	0.272695	-0.00191274	0.00356716	0.543722	0.0196054
59.83	2.73085	0.272695	-0.0012264	0.0034251	0.544409	0.0189407
60	2.73153	0.271681	-0.00191274	0.00356716	0.54235	0.0172401
60.17	2.72947	0.271681	-0.00191274	0.00356716	0.54235	0.0189407
60.33	2.72947	0.271681	-0.00191274	0.00356716	0.54235	0.0171403
60.5	2.72879	0.271714	-0.00191274	0.00356716	0.540977	0.0184224
60.67	2.72879	0.270637	-0.00191274	0.00356716	0.540977	0.0184224
60.83	2.72742	0.269622	-0.0012264	0.0034251	0.538918	0.0165658
61	2.72604	0.268609	-0.0012264	0.0034251	0.538918	0.0165658
61.17	2.72467	0.267598	-0.00191274	0.00356716	0.538918	0.0165658
61.33	2.7233	0.268646	-0.00191274	0.00356716	0.538918	0.0165658
61.5	2.72398	0.268609	-0.00191274	0.00356716	0.538232	0.0172401
61.67	2.72192	0.266551	-0.0012264	0.0034251	0.536173	0.0172401
61.83	2.72124	0.266588	-0.00191274	0.00356716	0.536173	0.0156261
62	2.71918	0.26453	-0.00191274	0.00356716	0.5348	0.0165658
62.17	2.71987	0.264493	-0.00191274	0.00356716	0.536173	0.0156261
62.33	2.71918	0.26453	-0.00191274	0.00356716	0.5348	0.0165658
62.5	2.71781	0.263522	-0.00191274	0.00356716	0.5348	0.0165658
62.67	2.71643	0.263482	-0.00191274	0.00356716	0.5348	0.0165658
62.83	2.71643	0.263482	-0.00191274	0.00356716	0.538232	0.022504
63	2.71575	0.261464	-0.00191274	0.00356716	0.533427	0.0141918
63.17	2.71369	0.261464	-0.00191274	0.00356716	0.533427	0.0141918
63.33	2.713	0.260414	-0.00191274	0.00356716	0.532741	0.0147629
63.5	2.71232	0.260457	-0.00191274	0.00356716	0.533427	0.0141918
63.67	2.71232	0.260457	-0.0012264	0.0034251	0.531368	0.0141918
63.83	2.71163	0.259406	-0.00191274	0.00356716	0.529309	0.0141918
64	2.70888	0.258356	-0.00191274	0.00356716	0.529309	0.0141918
64.17	2.70957	0.259406	-0.00191274	0.00356716	0.529309	0.0141918
64.33	2.70957	0.259406	-0.00191274	0.00356716	0.529309	0.0141918
64.5	2.70888	0.258356	-0.0012264	0.0034251	0.528623	0.0130052
64.67	2.70751	0.257349	-0.00191274	0.00356716	0.529309	0.0141918
64.83	2.70751	0.256261	-0.00191274	0.00356716	0.52725	0.0123856
65	2.70477	0.256299	-0.00191274	0.00356716	0.52725	0.0123856
65.17	2.70477	0.256299	-0.00191274	0.00356716	0.525878	0.0135743
65.33	2.70339	0.254203	-0.00191274	0.00356716	0.525191	0.0123856
65.5	2.70339	0.255291	-0.00191274	0.00356716	0.525191	0.0123856
65.67	2.70339	0.254203	-0.00191274	0.00356716	0.524505	0.011197
65.83	2.70271	0.254241	-0.00191274	0.00356716	0.524505	0.011197
66	2.70271	0.255215	-0.00191274	0.00356716	0.523819	0.0118192
66.17	2.70202	0.25417	-0.0012264	0.00288065	0.524505	0.011197
66.33	2.69996	0.253192	-0.00191274	0.00356716	0.52725	0.0177531
66.5	2.70065	0.253156	-0.00191274	0.00356716	0.522446	0.011197
66.67	2.69928	0.252144	-0.00191274	0.00356716	0.525878	0.0171403
66.83	2.69928	0.251068	-0.00191274	0.00356716	0.521073	0.0106715
67	2.69859	0.251098	-0.00191274	0.00356716	0.521073	0.0106715
67.17	2.69722	0.251068	-0.0012264	0.00473117	0.520387	0.011197
67.33	2.69859	0.251024	-0.00191274	0.00356716	0.520387	0.011197
67.5	2.69722	0.250003	-0.0012264	0.00473117	0.519701	0.0100085
67.67	2.69722	0.251068	-0.00191274	0.00356716	0.521073	0.0123856
67.83	2.69653	0.250025	-0.00191274	0.00356716	0.519014	0.00881997
68	2.69722	0.248951	-0.0012264	0.00473117	0.519014	0.00881997
68.17	2.69653	0.248965	-0.00191274	0.00356716	0.517642	0.0102574
68.33	2.69653	0.248965	-0.00191274	0.00356716	0.517642	0.0100085
68.5	2.69447	0.248965	-0.00191274	0.00356716	0.517642	0.0100085
68.67	2.69447	0.247917	-0.00191274	0.00356716	0.516955	0.00881997
68.83	2.69447	0.248941	-0.0012264	0.00473117	0.516269	0.00949159
69	2.69516	0.247912	-0.0012264	0.00473117	0.516955	0.0106715
69.17	2.69447	0.248941	-0.0012264	0.00473117	0.515583	0.00831419
69.33	2.6931	0.245853	-0.0012264	0.00473117	0.514896	0.00881997
69.5	2.69447	0.24586	-0.0012264	0.00473117	0.51421	0.00763155
69.67	2.69447	0.24586	-0.0012264	0.00473117	0.51421	0.00763155
69.83	2.69378	0.244836	-0.00191274	0.00356716	0.513524	0.00831419
70	2.69378	0.246894	0.000146263	0.00356716	0.513524	0.00644325
70.17	2.6931	0.244871	-0.0012264	0.00473117	0.512151	0.00763155
70.33	2.69378	0.244898	-0.00191274	0.00356716	0.514896	0.0123856
70.5	2.69378	0.244898	-0.00191274	0.00356716	0.511465	0.00831419
70.67	2.6931	0.243884	-0.00191274	0.00356716	0.510778	0.00714055
70.83	2.6931	0.243884	-0.00191274	0.00356716	0.510778	0.00714055
71	2.6931	0.244968	-0.0012264	0.0034251	0.510778	0.00714055
71.17	2.69173	0.245012	-0.00191274	0.00356716	0.512837	0.0106715
71.33	2.69241	0.243005	-0.00191274	0.00356716	0.508719	0.00714055
71.5	2.69378	0.242003	-0.0012264	0.00288065	0.509406	0.00682354
71.67	2.6931	0.24306	-0.00191274	0.00356716	0.508719	0.00714055
71.83	2.6931	0.242127	-0.00191274	0.00356716	0.510778	0.0106715
72	2.6931	0.242127	-0.00191274	0.00356716	0.509406	0.0102574

## Sheet: Figure 3 - Panel C
	OD at 600 nm
time (h)	nitrogen		no nitrogen		alanine
	Mean	SD	Mean	SD	Mean	SD
0	0.00173639		0.0152812	0.00658436	0.0126268	0.00084203
0.17	0.00173639		0.0145949	0.00774191	0.0126268	0.00084203
0.33	0.00173639		0.0152812	0.00858454	0.0115973	0.000613903
0.5	0.00173639		0.0166539	0.009722	0.0126268	0.00084203
0.67	0.00173639		0.0180265	0.00950146	0.0136563	0.00229796
0.83	0.00379539		0.0207719	0.0117293	0.0146858	0.00084203
1	0.00173639		0.0207719	0.0131888	0.0166539	0.00229849
1.17	0.00173639		0.0221445	0.0163122	0.0180265	0.00168261
1.33	0.00379539		0.0248899	0.0171458	0.0193992	0.0028477
1.5	0.00379539		0.0262625	0.0182917	0.0200855	0.00370972
1.67	0.00379539		0.0290079	0.0186361	0.0228309	0.00265907
1.83	0.00379539		0.0310669	0.020598	0.0242035	0.00370972
2	0.00585439		0.0324395	0.0202869	0.0248899	0.00402665
2.17	0.00585439		0.0344985	0.0217569	0.0262625	0.00521006
2.33	0.00585439		0.0372439	0.0240835	0.0276352	0.00639546
2.5	0.00585439		0.0399892	0.0264192	0.0296942	0.00639546
2.67	0.00585439		0.0427345	0.0287617	0.0317532	0.00639546
2.83	0.00585439		0.0447935	0.0291699	0.0324395	0.00712699
3	0.00585439		0.0489115	0.0326493	0.0351849	0.00758191
3.17	0.00791339		0.0516569	0.0349786	0.0365575	0.00712699
3.33	0.00791339		0.0557749	0.0365538	0.0393029	0.00946645
3.5	0.00997239		0.0592065	0.0396543	0.0406755	0.0106425
3.67	0.00997239		0.0633245	0.0431725	0.0441072	0.0102547
3.83	0.00997239		0.0681289	0.0455221	0.0461662	0.0122477
4	0.00997239		0.0715605	0.046698	0.0495979	0.0114114
4.17	0.00997239		0.0763649	0.0506913	0.0516569	0.0133906
4.33	0.00997239		0.0818555	0.0537651	0.0557749	0.0133906
4.5	0.00997239		0.0859735	0.0573048	0.0592065	0.01653
4.67	0.0140904		0.0887189	0.0594678	0.0633245	0.01653
4.83	0.0140904		0.0935232	0.0618381	0.0660699	0.0174045
5	0.0140904		0.0983275	0.064209	0.0701879	0.018827
5.17	0.0161494		0.101759	0.0672533	0.0756785	0.0199825
5.33	0.0182084		0.10725	0.0703065	0.0797965	0.0219614
5.5	0.0182084		0.111368	0.0718572	0.0839145	0.0239538
5.67	0.0202674		0.116172	0.0743624	0.0900915	0.0254267
5.83	0.0243854		0.119604	0.0755476	0.0955822	0.0270949
6	0.0243854		0.124408	0.0796293	0.101759	0.0291001
6.17	0.0264444		0.129213	0.0801688	0.108623	0.0313776
6.33	0.0305624		0.132644	0.0813563	0.1148	0.0333795
6.5	0.0305624		0.138821	0.0850333	0.121663	0.0356611
6.67	0.0326214		0.14088	0.0849191	0.129899	0.039105
6.83	0.0326214		0.147057	0.0867504	0.138821	0.0399452
7	0.0332168	0.00206984	0.150489	0.0861067	0.14843	0.0450841
7.17	0.0352758	0.0049817	0.154607	0.0879375	0.158039	0.0482262
7.33	0.0352758	0.0049817	0.158039	0.0892571	0.167647	0.0513686
7.5	0.0393938	0.0049817	0.162843	0.0897781	0.180001	0.0553858
7.67	0.0424823	0.00643763	0.167647	0.0903117	0.193042	0.0610729
7.83	0.0445413	0.00352577	0.171765	0.0904425	0.205396	0.0650774
8	0.0486593	0.00643763	0.177256	0.0896699	0.219122	0.0696398
8.17	0.0527773	0.0093495	0.181374	0.0897781	0.234222	0.0759206
8.33	0.0558658	0.0108054	0.185492	0.0879375	0.250694	0.083938
8.5	0.0610133	0.0093495	0.18961	0.0879375	0.267852	0.0922375
8.67	0.0661608	0.0137173	0.194414	0.0885918	0.287069	0.100541
8.83	0.0713083	0.0151732	0.197846	0.0879375	0.309032	0.109091
9	0.0774853	0.0180851	0.20265	0.0867504	0.329622	0.117154
9.17	0.0826328	0.019541	0.206082	0.0843765	0.35433	0.127958
9.33	0.0888098	0.0224529	0.211573	0.0820028	0.375606	0.137034
9.5	0.0970458	0.0253648	0.219122	0.0796293	0.399628	0.147018
9.67	0.106311	0.0297326	0.224613	0.0755476	0.425022	0.1553
9.83	0.0811692	0.063043	0.228731	0.0701381	0.451103	0.167292
10	0.0887189	0.0682247	0.235594	0.0653946	0.477184	0.179294
10.17	0.0955822	0.0762097	0.241085	0.0632109	0.508069	0.190157
10.33	0.104505	0.0813084	0.246576	0.0589667	0.536208	0.202172
10.5	0.1148	0.0874755	0.252753	0.0537651	0.56778	0.212858
10.67	0.125095	0.0957004	0.256184	0.0511769	0.599351	0.223608
10.83	0.13539	0.105051	0.260302	0.0495104	0.628863	0.231371
11	0.147744	0.112155	0.26442	0.0459701	0.663866	0.24335
11.17	0.162157	0.124499	0.268538	0.044347	0.698183	0.255834
11.33	0.17657	0.137824	0.273343	0.0415931	0.733186	0.268258
11.5	0.193728	0.151194	0.278147	0.0384836	0.770934	0.278418
11.67	0.210886	0.166627	0.281579	0.0365873	0.810742	0.289255
11.83	0.23079	0.183137	0.285697	0.0326493	0.84849	0.300939
12	0.254125	0.19957	0.289815	0.0311489	0.893102	0.313751
12.17	0.276088	0.218094	0.294619	0.028015	0.933595	0.319202
12.33	0.30011	0.237656	0.295992	0.0237288	0.977521	0.327075
12.5	0.325504	0.257247	0.299423	0.0214297	1.02213	0.337554
12.67	0.352957	0.273831	0.304228	0.0182917	1.06194	0.34606
12.83	0.378352	0.292536	0.308346	0.0182917	1.10243	0.352587
13	0.40855	0.311366	0.310405	0.015649	1.14567	0.362884
13.17	0.438749	0.330269	0.312464	0.0115472	1.18891	0.36995
13.33	0.471693	0.350539	0.319327	0.0115472	1.23833	0.388469
13.5	0.505323	0.370284	0.321386	0.00841831	1.28225	0.390822
13.67	0.541699	0.390693	0.324818	0.0111442	1.31451	0.395242
13.83	0.58082	0.414889	0.327563	0.0106425	1.35089	0.394928
14	0.623373	0.442995	0.329622	0.00781412	1.38108	0.391606
14.17	0.667298	0.472205	0.334426	0.0109391	1.40922	0.388788
14.33	0.712596	0.499207	0.335113	0.00958437	1.4408	0.381857
14.5	0.756521	0.527142	0.337858	0.0101058	1.4758	0.383222
14.67	0.802506	0.553041	0.34129	0.0134	1.50874	0.379991
14.83	0.849176	0.578345	0.344035	0.0142319	1.54031	0.373971
15	0.899279	0.60124	0.34678	0.0159101	1.56777	0.365978
15.17	0.953499	0.620755	0.347467	0.0171933	1.59522	0.35244
15.33	1.00703	0.644942	0.350212	0.0203384	1.62473	0.333495
15.5	1.06194	0.667202	0.35433	0.0211135	1.65493	0.313183
15.67	1.11685	0.683573	0.356389	0.0231645	1.68033	0.299475
15.83	1.17175	0.701573	0.357075	0.0268734	1.70092	0.297606
16	1.22872	0.712895	0.361193	0.0255102	1.71739	0.299294
16.17	1.28637	0.723712	0.363939	0.0273805	1.73523	0.303868
16.33	1.34265	0.732986	0.366684	0.0297738	1.7517	0.307424
16.5	1.39824	0.740515	0.368057	0.0320268	1.76749	0.314021
16.67	1.45384	0.746587	0.372861	0.0338293	1.78465	0.31825
16.83	1.50668	0.753863	0.371488	0.0352876	1.79975	0.32062
17	1.56159	0.759231	0.375606	0.0363036	1.81759	0.325527
17.17	1.61444	0.763492	0.377665	0.0377263	1.83338	0.328576
17.33	1.66797	0.767769	0.378352	0.0403647	1.85054	0.332811
17.5	1.71945	0.770157	0.38247	0.0401178	1.86838	0.334183
17.67	1.77024	0.770965	0.385215	0.0395691	1.88417	0.337239
17.83	1.82377	0.770259	0.385901	0.0417202	1.89927	0.339809
18	1.87662	0.762123	0.391392	0.0395691	1.91642	0.340506
18.17	1.93221	0.750228	0.389333	0.0440038	1.93152	0.343091
18.33	1.9878	0.733571	0.390019	0.0461828	1.94662	0.342142
18.5	2.04408	0.715749	0.396196	0.0439244	1.96172	0.344747
18.67	2.09693	0.697068	0.39551	0.0480053	1.97682	0.347107
18.83	2.15321	0.68148	0.394137	0.0481346	1.99055	0.346903
19	2.20606	0.666324	0.396883	0.0489285	2.00428	0.346449
19.17	2.2589	0.650866	0.397569	0.0509064	2.018	0.347905
19.33	2.31107	0.638805	0.400314	0.0516304	2.03036	0.348194
19.5	2.36185	0.623654	0.400314	0.0532012	2.04408	0.347756
19.67	2.40921	0.610569	0.402373	0.0548044	2.05575	0.347321
19.83	2.45794	0.597051	0.40306	0.0543739	2.0681	0.347321
20	2.50393	0.582819	0.405119	0.0540776	2.07977	0.345287
20.17	2.54716	0.56789	0.405805	0.0571588	2.09213	0.34721
20.33	2.5705	0.537473	0.412668	0.0528984	2.10242	0.345616
20.5	2.60276	0.51437	0.410609	0.057078	2.11409	0.345199
20.67	2.63845	0.493124	0.409923	0.0590708	2.12507	0.344026
20.83	2.66933	0.473299	0.411982	0.0571588	2.13468	0.343613
21	2.7009	0.454396	0.411982	0.0606936	2.14566	0.342798
21.17	2.7311	0.432954	0.413355	0.0614227	2.1539	0.340862
21.33	2.75375	0.406448	0.414727	0.0602465	2.16145	0.340828
21.5	2.76611	0.373731	0.4161	0.0625993	2.17243	0.33966
21.67	2.78601	0.348241	0.418159	0.0629228	2.18066	0.33966
21.83	2.80591	0.32644	0.418845	0.0637764	2.18753	0.336931
22	2.82513	0.300626	0.420218	0.0645144	2.19508	0.338099
22.17	2.84229	0.276251	0.420218	0.0645144	2.20194	0.334987
22.33	2.86013	0.254625	0.422963	0.0656895	2.20949	0.333043
22.5	2.87866	0.230287	0.424336	0.0645144	2.21635	0.329929
22.67	2.89376	0.20629	0.425709	0.0671995	2.22047	0.329929
22.83	2.91024	0.183227	0.426395	0.0664382	2.22596	0.327203
23	2.92602	0.161375	0.427081	0.0676111	2.23077	0.326429
23.17	2.93975	0.138472	0.42914	0.0689542	2.23557	0.323315
23.33	2.95279	0.118005	0.431199	0.0676111	2.23969	0.319816
23.5	2.9672	0.098071	0.432572	0.0683698	2.24518	0.319033
23.67	2.97955	0.0781082	0.434631	0.0677732	2.24861	0.314753
23.83	2.9926	0.0611833	0.433258	0.0692174	2.25067	0.314753
24	3.00289	0.0482104	0.435317	0.0711332	2.25273	0.310861
24.17	3.01524	0.0376898	0.43669	0.0692664	2.25547	0.308138
24.33	3.02623	0.0345717	0.437376	0.0706201	2.25822	0.305024
24.5	3.01456	0.0398239	0.439435	0.0686104	2.26028	0.301524
24.67	3.01799	0.0372321	0.438063	0.0718034	2.25959	0.297243
24.83	3.02417	0.0392621	0.447671	0.0651045	2.2589	0.292962
25	3.02966	0.0376715	0.442181	0.0718034	2.26028	0.290629
25.17	3.02966	0.0386942	0.44424	0.0697975	2.2589	0.285568
25.33	3.0324	0.0377228	0.446985	0.0694369	2.26028	0.279343
25.5	3.03583	0.0371795	0.444926	0.0754034	2.25822	0.27584
25.67	3.03583	0.0385322	0.453162	0.0655422	2.25753	0.27156
25.83	3.03927	0.039105	0.448358	0.0739271	2.25685	0.26728
26	3.04064	0.0398118	0.446299	0.0758357	2.25547	0.26261
26.17	3.04064	0.0402577	0.448358	0.0758357	2.25204	0.255996
26.33	3.0427	0.0402577	0.44973	0.0765774	2.2493	0.251331
26.5	3.04201	0.0390412	0.450417	0.0761586	2.24518	0.243944
26.67	3.04476	0.0417647	0.45728	0.0708903	2.24106	0.236558
26.83	3.04682	0.0398118	0.453162	0.0767482	2.23694	0.231872
27	3.04682	0.0402577	0.453162	0.0773303	2.23557	0.226432
27.17	3.04819	0.0394421	0.453162	0.0773303	2.23282	0.222531
27.33	3.04887	0.0402577	0.455221	0.0789268	2.23008	0.217103
27.5	3.04956	0.0430849	0.457966	0.0765774	2.22733	0.216314
27.67	3.05231	0.0419425	0.461398	0.0748629	2.2239	0.210561
27.83	3.05162	0.0430849	0.457966	0.0801022	2.22047	0.206391
28	3.05368	0.0416766	0.460712	0.0796753	2.21841	0.203937
28.17	3.05437	0.0439455	0.460712	0.0796753	2.21567	0.202181
28.33	3.05505	0.041443	0.462084	0.0781893	2.21223	0.198177
28.5	3.05505	0.043469	0.473066	0.0697016	2.21086	0.197634
28.67	3.05505	0.044821	0.46483	0.0796753	2.20812	0.196631
28.83	3.05848	0.0445882	0.464143	0.0804343	2.20743	0.195048
29	3.05848	0.0466139	0.47032	0.0760453	2.20674	0.19483
29.17	3.05848	0.0466139	0.468948	0.0777519	2.20606	0.194031
29.33	3.05986	0.0472093	0.473752	0.0746764	2.20468	0.190887
29.5	3.06054	0.0461231	0.475811	0.074473	2.20537	0.19257
29.67	3.05986	0.0504955	0.477184	0.0733591	2.20331	0.19257
29.83	3.05917	0.0491452	0.478556	0.0738633	2.20194	0.193506
30	3.05848	0.0502223	0.47787	0.0762846	2.20125	0.193345
30.17	3.05917	0.050345	0.476497	0.0779292	2.20125	0.193345
30.33	3.06123	0.0523909	0.476497	0.0795936	2.20194	0.194288
30.5	3.05917	0.0536367	0.47787	0.0802919	2.20057	0.193191
30.67	3.05917	0.0544378	0.479929	0.0782326	2.19782	0.194288
30.83	3.06054	0.0555267	0.478556	0.0820221	2.19782	0.195089
31	3.05848	0.0567784	0.480615	0.0798217	2.19713	0.195386
31.17	3.05917	0.0597582	0.483361	0.0769211	2.19645	0.195234
31.33	3.05848	0.0616669	0.484733	0.0794182	2.19439	0.196485
31.5	3.05848	0.0621372	0.479929	0.0827767	2.1937	0.197585
31.67	3.05642	0.0654836	0.481988	0.082454	2.19302	0.198686
31.83	3.05437	0.0668343	0.482674	0.0855455	2.19164	0.199625
32	3.05162	0.0679637	0.484733	0.0839487	2.19096	0.200726
32.17	3.04887	0.0711084	0.484733	0.0839487	2.18959	0.202929
32.33	3.04682	0.0719304	0.48542	0.0831962	2.18821	0.202351
32.5	3.04544	0.0737272	0.487479	0.0829007	2.18821	0.203866
32.67	3.04338	0.07524	0.488165	0.0859844	2.18547	0.206242
32.83	3.03995	0.0771705	0.493656	0.0804834	2.18547	0.208279
33	3.03927	0.0796215	0.496401	0.0780385	2.18478	0.211421
33.17	3.03652	0.0824398	0.497087	0.079227	2.18272	0.213458
33.33	3.03378	0.0815413	0.495028	0.0811305	2.18135	0.213634
33.5	3.03034	0.0837741	0.499833	0.0804155	2.17998	0.217368
33.67	3.02417	0.0855061	0.499146	0.079227	2.17792	0.218638
33.83	3.02417	0.0836875	0.500519	0.0780385	2.17723	0.22178
34	3.02142	0.0812891	0.503951	0.0786182	2.17586	0.223991
34.17	3.02142	0.0796293	0.503264	0.0792115	2.17517	0.227133
34.33	3.01936	0.0780972	0.504637	0.0780228	2.1738	0.231383
34.5	3.01799	0.0717142	0.506696	0.0780228	2.17243	0.2336
34.67	3.01662	0.0708219	0.50601	0.0786296	2.17037	0.236932
34.83	3.01456	0.0692303	0.508755	0.0798181	2.16831	0.238964
35	3.01387	0.0684736	0.508755	0.0798069	2.169	0.243219
35.17	3.01387	0.0704016	0.510128	0.0786182	2.16831	0.246363
35.33	3.01319	0.0712595	0.510128	0.0804003	2.16625	0.25102
35.5	3.01181	0.0700824	0.512873	0.0780614	2.16488	0.251932
35.67	3.00907	0.0693554	0.514246	0.0788138	2.16488	0.258637
35.83	3.00701	0.0693554	0.514246	0.0786948	2.16282	0.260663
36	3.00426	0.0686413	0.515618	0.0775073	2.16076	0.265364
36.17	3.00014	0.0684378	0.515618	0.0792495	2.16076	0.268735
36.33	2.99877	0.068842	0.516991	0.0781542	2.16007	0.271881
36.5	2.99809	0.071806	0.516991	0.0798824	2.15939	0.274365
36.67	2.99397	0.0685161	0.51905	0.0798824	2.15801	0.276621
36.83	2.99122	0.0680325	0.520423	0.0788138	2.15527	0.279124
37	2.98916	0.0680325	0.519736	0.079341	2.15321	0.282519
37.17	2.98573	0.0687454	0.521109	0.0781542	2.15184	0.288186
37.33	2.9823	0.0678612	0.51905	0.0798181	2.14772	0.290196
37.5	2.98093	0.0670497	0.520423	0.0804377	2.14566	0.295001
37.67	2.97681	0.0670497	0.519736	0.0809956	2.14429	0.298689
37.83	2.97338	0.0663136	0.523168	0.0798181	2.13948	0.299829
38	2.97063	0.0659746	0.522482	0.0821953	2.13811	0.303534
38.17	2.96651	0.0659746	0.524541	0.0804003	2.13674	0.306392
38.33	2.96514	0.065951	0.525227	0.0798181	2.13193	0.309533
38.5	2.96308	0.0673553	0.5266	0.0786948	2.13125	0.312101
38.67	2.9624	0.0659746	0.5266	0.0804377	2.12987	0.314387
38.83	2.96171	0.067129	0.527286	0.0798181	2.12576	0.317818
39	2.95828	0.0670497	0.527972	0.0792495	2.12507	0.320958
39.17	2.95896	0.0690353	0.528659	0.0786948	2.12164	0.321253
39.33	2.95828	0.0715773	0.53209	0.0776281	2.11958	0.323247
39.5	2.95622	0.0696995	0.53209	0.0776281	2.11752	0.326683
39.67	2.95485	0.0702018	0.528659	0.0822251	2.11546	0.328676
39.83	2.95073	0.0702018	0.529345	0.081589	2.11272	0.331816
40	2.95073	0.0702018	0.530031	0.0792115	2.11134	0.334106
40.17	2.94798	0.0696995	0.543758	0.0719402	2.10997	0.336398
40.33	2.94455	0.0690353	0.531404	0.0798181	2.10791	0.337848
40.5	2.94387	0.0696995	0.530718	0.0804003	2.10654	0.340144
40.67	2.94112	0.0692138	0.527286	0.0853476	2.10517	0.342976
40.83	2.93769	0.0680325	0.534836	0.0769675	2.10173	0.344739
41	2.93494	0.0675663	0.543072	0.0717212	2.10036	0.345578
41.17	2.93357	0.0680325	0.545817	0.0719402	2.09968	0.348715
41.33	2.93083	0.0671621	0.546503	0.0716647	2.0983	0.349556
41.5	2.92877	0.067333	0.547876	0.0698344	2.09693	0.349863
41.67	2.92739	0.0680325	0.546503	0.0710879	2.09556	0.352694
41.83	2.92533	0.06449	0.550621	0.0696419	2.09418	0.35446
42	2.92328	0.0661501	0.541699	0.0736173	2.09281	0.355297
42.17	2.92122	0.0661501	0.546503	0.0710879	2.09144	0.358126
42.33	2.91847	0.0640311	0.542385	0.0732034	2.09075	0.358745
42.5	2.9171	0.0628535	0.547876	0.0719402	2.09007	0.361881
42.67	2.91573	0.0635911	0.551308	0.0720704	2.08869	0.360732
42.83	2.91367	0.0635911	0.55268	0.0709513	2.08732	0.361571
43	2.91298	0.0612425	0.547876	0.072877	2.08732	0.363031
43.17	2.91092	0.0628535	0.538267	0.0792495	2.08801	0.363868
43.33	2.90886	0.0612425	0.549935	0.0719402	2.08458	0.365648
43.5	2.9068	0.0593233	0.554739	0.0716772	2.08526	0.366482
43.67	2.90543	0.0604357	0.558857	0.0698675	2.08389	0.369303
43.83	2.90063	0.0600635	0.556112	0.07015	2.08183	0.371291
44	2.89857	0.0605353	0.559544	0.0698472	2.08114	0.37244
44.17	2.89788	0.0627694	0.558857	0.0698675	2.07977	0.372753
44.33	2.89514	0.0604357	0.557485	0.0699685	2.07909	0.373903
44.5	2.89308	0.0608698	0.554053	0.0705718	2.0784	0.377038
44.67	2.89308	0.0604357	0.561603	0.0688255	2.07703	0.375888
44.83	2.89033	0.0600635	0.561603	0.0688255	2.07565	0.378189
45	2.88896	0.0608698	0.551308	0.0707991	2.07565	0.379657
45.17	2.88621	0.0585568	0.549935	0.0713954	2.07291	0.379339
45.33	2.88553	0.0602224	0.550621	0.0696595	2.07497	0.381324
45.5	2.88278	0.0593836	0.554053	0.0698344	2.07291	0.38331
45.67	2.88072	0.0608698	0.549249	0.0717212	2.07222	0.382474
45.83	2.87935	0.0616884	0.558857	0.0689075	2.07085	0.384776
46	2.87729	0.0607977	0.540326	0.0775073	2.06879	0.38676
46.17	2.8766	0.0608698	0.557485	0.0690714	2.06948	0.387078
46.33	2.87523	0.0602224	0.54719	0.0743742	2.06948	0.387596
46.5	2.87386	0.0590766	0.548562	0.0720652	2.0681	0.387911
46.67	2.87043	0.0579324	0.556112	0.07015	2.06605	0.387399
46.83	2.86974	0.0576544	0.534149	0.0829756	2.06605	0.389381
47	2.867	0.0573998	0.542385	0.0761393	2.06536	0.391046
47.17	2.86494	0.0567901	0.559544	0.0688563	2.06467	0.390213
47.33	2.86288	0.0573998	0.551994	0.07117	2.0633	0.393031
47.5	2.86219	0.056519	0.559544	0.0709141	2.06261	0.394182
47.67	2.86082	0.0573998	0.551308	0.0714079	2.06193	0.393348
47.83	2.85945	0.0569615	0.53209	0.0848305	2.06193	0.395332
48	2.8567	0.0560486	0.549935	0.0713954	2.05987	0.396802
48.17	2.85601	0.0551463	0.551994	0.07117	2.05987	0.397317
48.33	2.85464	0.0560486	0.543758	0.0736173	2.0585	0.397634
48.5	2.85327	0.0562718	0.53964	0.0781542	2.05781	0.398785
48.67	2.85121	0.0582915	0.530031	0.0850197	2.05712	0.400453
48.83	2.85052	0.0573998	0.538954	0.0786948	2.05575	0.399303
49	2.84984	0.0585302	0.538954	0.0769675	2.05506	0.399936
49.17	2.84709	0.0582915	0.543758	0.0736173	2.05438	0.401088
49.33	2.84572	0.0585302	0.5266	0.0883396	2.05369	0.402753
49.5	2.84435	0.0573998	0.5266	0.0883396	2.05438	0.403589
49.67	2.84229	0.0580761	0.527286	0.0876167	2.053	0.405889
49.83	2.84023	0.0580761	0.542385	0.074791	2.05369	0.406725
50	2.83886	0.0577164	0.551994	0.0693165	2.053	0.407874
50.17	2.83748	0.0578843	0.5266	0.0883396	2.05163	0.406725
50.33	2.83611	0.0560486	0.547876	0.0719402	2.05163	0.408712
50.5	2.83542	0.0571687	0.524541	0.0886409	2.05163	0.408712
50.67	2.83337	0.0578843	0.525913	0.0871618	2.05026	0.410491
50.83	2.83268	0.0556759	0.547876	0.07117	2.05026	0.410491
51	2.83199	0.0567784	0.536208	0.0776281	2.04957	0.410699
51.17	2.82925	0.0566197	0.523854	0.0890724	2.05095	0.41331
51.33	2.82788	0.0567784	0.538267	0.0761393	2.04889	0.41331
51.5	2.8265	0.0569615	0.531404	0.081604	2.04751	0.414147
51.67	2.82582	0.0567784	0.521795	0.0913284	2.0482	0.41446
51.83	2.82376	0.0555267	0.523168	0.0898149	2.04751	0.415611
52	2.82238	0.0556759	0.521795	0.0909894	2.04751	0.418121
52.17	2.82101	0.0538173	0.527972	0.0865337	2.04751	0.418121
52.33	2.82033	0.0564856	0.521795	0.0909894	2.04614	0.418432
52.5	2.81895	0.0554027	0.531404	0.0798181	2.04614	0.420419
52.67	2.81621	0.0536367	0.520423	0.090567	2.04614	0.420419
52.83	2.81621	0.0556759	0.518364	0.0921642	2.04546	0.421568
53	2.81346	0.0555267	0.527286	0.081589	2.04614	0.423867
53.17	2.81278	0.0554027	0.516305	0.0948299	2.04477	0.423247
53.33	2.8114	0.0555267	0.517677	0.0909894	2.04546	0.423556
53.5	2.81003	0.0544378	0.515618	0.0948413	2.0434	0.425017
53.67	2.80797	0.055304	0.516305	0.0924989	2.04477	0.426692
53.83	2.80729	0.0543243	0.516991	0.0933394	2.0434	0.427532
54	2.80454	0.0551829	0.514246	0.0944362	2.04271	0.428681
54.17	2.80248	0.0551829	0.514246	0.0940859	2.04408	0.430364
54.33	2.80111	0.0552307	0.514932	0.0917396	2.04271	0.432127
54.5	2.80248	0.0554027	0.516305	0.0921642	2.04271	0.432659
54.67	2.80042	0.0551829	0.512873	0.0956056	2.04202	0.433807
54.83	2.79974	0.055304	0.516305	0.0960132	2.04202	0.435797
55	2.79768	0.0562322	0.513559	0.094515	2.04271	0.43664
55.17	2.79699	0.0531744	0.512873	0.0934409	2.04134	0.436944
55.33	2.79424	0.0551829	0.513559	0.0909894	2.04202	0.438332
55.5	2.79424	0.0551829	0.508755	0.0956056	2.04202	0.439778
55.67	2.79219	0.0542366	0.510128	0.0940859	2.04065	0.442072
55.83	2.79013	0.0541296	0.508755	0.0936699	2.04271	0.444063
56	2.78875	0.0561979	0.516305	0.0876092	2.04065	0.442616
56.17	2.7867	0.055164	0.557485	0.0774805	2.04065	0.442616
56.33	2.7867	0.0541392	0.530031	0.0760073	2.04065	0.446604
56.5	2.78532	0.0562322	0.510814	0.0946982	2.04134	0.446901
56.67	2.78532	0.0541749	0.508755	0.096867	2.04134	0.447454
56.83	2.78258	0.0541392	0.506696	0.094957	2.04065	0.45004
57	2.7812	0.0551606	0.538267	0.0750769	2.04134	0.450888
57.17	2.78052	0.0552307	0.520423	0.079212	2.04065	0.452589
57.33	2.77846	0.0541392	0.527286	0.0773666	2.04065	0.452589
57.5	2.77915	0.0551606	0.507382	0.0906959	2.04271	0.452589
57.67	2.7764	0.0531052	0.504637	0.096867	2.04134	0.454877
57.83	2.77503	0.0531017	0.514246	0.100125	2.04134	0.457437
58	2.77365	0.0541296	0.545131	0.076568	2.04134	0.457437
58.17	2.77365	0.0520706	0.529345	0.0766903	2.04202	0.459722
58.33	2.77228	0.0541392	0.514932	0.0851906	2.04271	0.460577
58.5	2.76885	0.053192	0.506696	0.0924652	2.04202	0.46172
58.67	2.76748	0.055193	0.510814	0.0866513	2.04202	0.46172
58.83	2.76679	0.0531017	0.510128	0.085761	2.04202	0.463718
59	2.76679	0.0541461	0.504637	0.0906262	2.04408	0.465716
59.17	2.76473	0.053192	0.499833	0.0954118	2.04202	0.467146
59.33	2.76473	0.053192	0.49846	0.0963589	2.04408	0.467716
59.5	2.76336	0.0520706	0.49846	0.0965913	2.04408	0.469715
59.67	2.76267	0.0541461	0.497774	0.0951765	2.0434	0.470857
59.83	2.76061	0.0543519	0.497087	0.0956671	2.0434	0.470857
60	2.75993	0.055164	0.496401	0.0944835	2.04546	0.472856
60.17	2.75924	0.0541296	0.497774	0.0912788	2.04477	0.473998
60.33	2.75924	0.0531354	0.495715	0.0951765	2.04477	0.475998
60.5	2.7565	0.0541461	0.495028	0.0939942	2.04546	0.476858
60.67	2.75581	0.0541887	0.495028	0.0939942	2.04546	0.476858
60.83	2.75306	0.0531354	0.493656	0.0970603	2.04751	0.478859
61	2.75306	0.0531354	0.493656	0.0949852	2.04751	0.480861
61.17	2.75238	0.0541461	0.493656	0.0933	2.0482	0.483141
61.33	2.75101	0.0542573	0.492969	0.0954991	2.0482	0.483727
61.5	2.74826	0.0543519	0.493656	0.0948383	2.05026	0.485142
61.67	2.74895	0.0531354	0.493656	0.0916301	2.04889	0.486005
61.83	2.74826	0.0520878	0.493656	0.0921642	2.04889	0.488008
62	2.74552	0.0521321	0.493656	0.0916301	2.05095	0.490011
62.17	2.7462	0.053192	0.495715	0.0886409	2.05026	0.49115
62.33	2.74414	0.053192	0.491597	0.0935174	2.05163	0.492289
62.5	2.74208	0.053192	0.490224	0.092812	2.05163	0.494292
62.67	2.74208	0.053192	0.488165	0.0946982	2.05232	0.495157
62.83	2.74071	0.0546181	0.486792	0.0923368	2.05232	0.494568
63	2.73865	0.0533847	0.486792	0.0921167	2.05232	0.498574
63.17	2.73728	0.0532752	0.486106	0.0926159	2.05232	0.498574
63.33	2.73659	0.0554331	0.48542	0.0931277	2.05369	0.500304
63.5	2.73453	0.0533847	0.486106	0.0890628	2.05438	0.501172
63.67	2.73453	0.0533847	0.489538	0.0880854	2.05506	0.503447
63.83	2.73247	0.0525783	0.494342	0.0851	2.05438	0.504585
64	2.73247	0.0533847	0.486106	0.0872007	2.05506	0.505452
64.17	2.72904	0.0544722	0.484733	0.0902471	2.05575	0.506321
64.33	2.72973	0.0535204	0.483361	0.0897504	2.05712	0.508866
64.5	2.72767	0.0535204	0.483361	0.0916301	2.05712	0.507458
64.67	2.7263	0.0546181	0.480615	0.0904483	2.05918	0.51087
64.83	2.72561	0.0543519	0.478556	0.0919421	2.05918	0.514881
65	2.72561	0.0535204	0.477184	0.0931277	2.05987	0.513744
65.17	2.72493	0.0536821	0.478556	0.0936517	2.06055	0.514013
65.33	2.72287	0.0544722	0.476497	0.0918134	2.06055	0.516018
65.5	2.72287	0.0536821	0.475811	0.0923602	2.06055	0.518024
65.67	2.72218	0.0525783	0.476497	0.0921167	2.06261	0.52003
65.83	2.72081	0.0536821	0.474438	0.0919421	2.06261	0.52003
66	2.72012	0.0546181	0.473752	0.0906262	2.0633	0.520298
66.17	2.71806	0.0546181	0.472379	0.0917308	2.06399	0.523173
66.33	2.71738	0.0535204	0.471007	0.0893542	2.0633	0.523713
66.5	2.716	0.0546181	0.472379	0.0899846	2.06467	0.525447
66.67	2.71326	0.0527562	0.472379	0.088166	2.06536	0.526316
66.83	2.71394	0.0525783	0.471693	0.0869778	2.06742	0.528322
67	2.71257	0.0536821	0.469634	0.087065	2.06605	0.52859
67.17	2.71257	0.0557196	0.47032	0.088166	2.0681	0.529998
67.33	2.71188	0.0518411	0.469634	0.0887969	2.0681	0.532002
67.5	2.71051	0.0536821	0.467575	0.0906262	2.06879	0.53287
67.67	2.70845	0.0516463	0.46483	0.0911124	2.06879	0.53287
67.83	2.70983	0.0538695	0.463457	0.0905055	2.07085	0.534875
68	2.70708	0.0540824	0.462771	0.091099	2.07085	0.534875
68.17	2.70639	0.054986	0.462771	0.0893168	2.07085	0.538888
68.33	2.70571	0.0525783	0.462771	0.0893168	2.07154	0.539156
68.5	2.70502	0.0547894	0.464143	0.0881281	2.07291	0.540293
68.67	2.70296	0.0540824	0.463457	0.0869778	2.07359	0.541161
68.83	2.70228	0.0543205	0.463457	0.0851552	2.07291	0.543706
69	2.7009	0.0547894	0.462771	0.0839665	2.07428	0.544844
69.17	2.70022	0.0536821	0.462084	0.0845724	2.07497	0.545711
69.33	2.69953	0.0531901	0.462084	0.0863789	2.07565	0.546579
69.5	2.69884	0.0520623	0.461398	0.0870086	2.07771	0.547987
69.67	2.69816	0.0537258	0.461398	0.0869496	2.07703	0.547716
69.83	2.69679	0.0534454	0.459339	0.0851552	2.07771	0.547987
70	2.69404	0.0543205	0.459339	0.0851552	2.07977	0.549991
70.17	2.69473	0.0534454	0.457966	0.086344	2.07977	0.551996
70.33	2.69335	0.0545835	0.457966	0.0863582	2.07977	0.554002
70.5	2.69335	0.0525826	0.455907	0.0845619	2.08114	0.554545
70.67	2.69129	0.0540309	0.455221	0.0851552	2.08183	0.55541
70.83	2.69129	0.0545835	0.454535	0.0857506	2.08252	0.556277
71	2.69061	0.052881	0.452476	0.0858208	2.08252	0.557687
71.17	2.68924	0.0525826	0.450417	0.0840024	2.08389	0.559419
71.33	2.68855	0.0534454	0.451789	0.0846331	2.08389	0.560829
71.5	2.68786	0.0517327	0.450417	0.0840887	2.08458	0.561695
71.67	2.68649	0.052881	0.450417	0.0840887	2.08595	0.562833
71.83	2.6858	0.0537258	0.450417	0.0823716	2.08732	0.565386
72	2.68512	0.0531901	0.451103	0.0799996	2.08801	0.564246

## Sheet: Figure 3 - Panel D
	OD at 600 nm at 96 h
glc	+	+	-
NH4+	+	-	+
ala	-	+	+
Replicate 1	0.6	0.02	0.02
Replicate 2	0.58	0.03	0.03
Replicate 3	0.75	0.02	0.01
Replicate 4	0.54	0.03	0.02
