# Supplementary material for: Spatial alanine metabolism determines local growth dynamics of Escherichia coli colonies
Source: eLife. 2021 Nov 9;10:e70794. doi: 10.7554/eLife.70794 (PMC8579308; doi:10.7554/eLife.70794)
Supplement: Figure 4—source data 1. [file elife-70794-fig4-data1.xlsx]

## Sheet: Figure 4 - Panel A
	fraction of dead cells (fold change)
Strain	KDE722			KDE2185			KDE2438			KDE2183			KDE2007			KDE2533			KDE2009			KDE2604			KDE2607			KDE2564			KDE2086
colony height (%)	Replicate 1	Replicate 2	Replicate 3	Replicate 1	Replicate 2	Replicate 3	Replicate 1	Replicate 2	Replicate 3	Replicate 1	Replicate 2	Replicate 3	Replicate 1	Replicate 2	Replicate 3	Replicate 1	Replicate 2	Replicate 3	Replicate 1	Replicate 2	Replicate 3	Replicate 1	Replicate 2	Replicate 3	Replicate 1	Replicate 2	Replicate 3	Replicate 1	Replicate 2	Replicate 3	Replicate 1	Replicate 2	Replicate 3
0	0.0847067	0.301174	0.399441	0.476239	0.148224	0.156485	0.160643	0.173871	0.0724891	0.0965829	0.180642	0.00179774	0.0667178	0.0965655	0.0458091	0.16374	0.0616609	0.00205349	0.0177584	0.00839555	0.00547055	0.0116513	0.0801478	0.06195	0.060853	0.0288971	0.0262884	0.287632	0.0737187	0.00562775	0.1876	0.10597	0.041743
0.025	0.0861456	0.0831387	0.315088	0.763271	0.093883	0.0355489	0.174349	0.106594	0.0337973	0.171597	0.367762	0.0065379	0.110192	0.0563974	0.0376371	0.175874	0.0715048	0.00359425	0.0265772	0.00903026	0.00787182	0.0168607	0.0536371	0.0229897	0.0875154	0.0134286	0.0137045	0.149962	0.0712662	0.00394141	0.137612	0.0793819	0.0953171
0.05	0.0966743	0.0490925	0.283173	0.614687	0.085233	0.0355687	0.197472	0.150843	0.031418	0.195497	0.121548	0.0239126	0.126897	0.0789955	0.0534295	0.135713	0.108582	0.00424779	0.0800314	0.0204801	0.0140565	0.119097	0.0643584	0.00548631	0.0862779	0.0238232	0.0176989	0.058481	0.0998501	0.00463157	0.151852	0.0752392	0.154782
0.075	0.10939	0.050448	0.167725	0.408749	0.106757	0.0436115	0.30152	0.187412	0.0556038	0.249513	0.113994	0.0363955	0.152734	0.0682507	0.05582	0.150527	0.116449	0.00502268	0.159184	0.0345692	0.0192494	0.0312611	0.104798	0.0106691	0.169034	0.0658137	0.0330252	0.122317	0.17551	0.0173195	0.15931	0.0905281	0.213692
0.1	0.13934	0.0468199	0.178444	0.349726	0.135592	0.0533513	0.298107	0.222561	0.0710262	0.271334	0.149521	0.0492852	0.223358	0.0987907	0.0582157	0.116246	0.10624	0.00598017	0.187796	0.0395149	0.0245633	0.0723059	0.146763	0.0238413	0.235152	0.0974846	0.0506123	0.160222	0.236643	0.0227296	0.213165	0.144199	0.266264
0.125	0.195485	0.0474271	0.227053	0.344577	0.163053	0.0624335	0.433712	0.261677	0.0779509	0.349742	0.188445	0.0730165	0.319356	0.146395	0.0834766	0.148392	0.115312	0.00908346	0.245165	0.0414378	0.0363757	0.0759622	0.168523	0.0373951	0.283002	0.110423	0.0693069	0.143827	0.26434	0.0427702	0.287705	0.182098	0.323026
0.15	0.233646	0.0613946	0.207847	0.376428	0.196095	0.0792161	0.460558	0.306186	0.0868411	0.39528	0.229601	0.0935853	0.37283	0.157831	0.0867979	0.173896	0.134946	0.0127162	0.310207	0.0462337	0.0534996	0.128084	0.170703	0.0417629	0.195037	0.131528	0.0877106	0.0984679	0.278944	0.0497947	0.366193	0.187682	0.449904
0.175	0.262304	0.0428584	0.286529	0.370331	0.228497	0.0823695	0.467358	0.365187	0.0886139	0.393096	0.280284	0.104928	0.393358	0.158535	0.119515	0.239714	0.141841	0.0124309	0.405719	0.0570382	0.0673692	0.178618	0.180529	0.0494719	0.276953	0.171243	0.0973778	0.196953	0.303974	0.0780012	0.423908	0.197039	0.668007
0.2	0.287285	0.04518	0.281471	0.38036	0.258087	0.0969751	0.52629	0.373299	0.102774	0.450159	0.303169	0.128514	0.412098	0.198633	0.141568	0.262638	0.145969	0.0224879	0.442367	0.0767986	0.0779618	0.151723	0.224239	0.0533918	0.327246	0.209488	0.0986363	0.259761	0.388652	0.0966554	0.503552	0.25768	0.951875
0.225	0.289972	0.050972	0.293747	0.422065	0.283812	0.105763	0.526621	0.418393	0.129518	0.485848	0.290681	0.167547	0.449641	0.227445	0.176717	0.273335	0.155057	0.021726	0.469709	0.0973286	0.100747	0.185531	0.225114	0.0644291	0.348824	0.245011	0.138104	0.275243	0.384048	0.114352	0.648039	0.316869	1.27827
0.25	0.298395	0.0486202	0.329269	0.457576	0.293119	0.106382	0.558	0.439308	0.134371	0.477903	0.30743	0.215516	0.489929	0.217042	0.194477	0.348421	0.153437	0.0246676	0.528966	0.105654	0.107595	0.236529	0.22117	0.0790751	0.414298	0.237194	0.14802	0.334703	0.40894	0.130954	0.791025	0.392261	1.69884
0.275	0.339725	0.0568238	0.370853	0.46133	0.301036	0.114779	0.576304	0.458096	0.13483	0.487833	0.324627	0.259381	0.525424	0.237279	0.185663	0.33548	0.135749	0.0284237	0.539539	0.123633	0.129765	0.270016	0.233642	0.0938651	0.443156	0.24568	0.161123	0.377654	0.415938	0.156056	0.959064	0.484843	2.29481
0.3	0.340859	0.085123	0.396404	0.492062	0.350396	0.129043	0.536678	0.452116	0.161694	0.501836	0.308372	0.28685	0.554434	0.25869	0.233692	0.371879	0.145333	0.0331027	0.526239	0.14573	0.15169	0.297601	0.251032	0.129667	0.441124	0.273096	0.166744	0.434644	0.421676	0.187143	1.24367	0.55723	2.91337
0.325	0.379843	0.101485	0.423903	0.555646	0.377605	0.144345	0.53167	0.451872	0.199895	0.511865	0.352714	0.324651	0.575629	0.290269	0.278854	0.383785	0.144982	0.0400651	0.567613	0.176192	0.170206	0.323878	0.237059	0.143147	0.456613	0.289384	0.17261	0.447972	0.435888	0.212664	1.51502	0.70332	3.70245
0.35	0.381647	0.124133	0.472782	0.586324	0.348292	0.159666	0.543781	0.474189	0.221982	0.471459	0.317642	0.333916	0.612912	0.323887	0.32997	0.423735	0.152951	0.0496114	0.601986	0.19133	0.189776	0.354565	0.216327	0.183866	0.448315	0.305248	0.197431	0.450084	0.430765	0.24456	1.76696	0.88355	4.46368
0.375	0.407522	0.141932	0.516502	0.650148	0.334933	0.179327	0.580121	0.467658	0.231387	0.549934	0.338076	0.343281	0.602118	0.324192	0.348391	0.402723	0.172073	0.0602744	0.608341	0.217767	0.21358	0.363997	0.239655	0.217492	0.448245	0.31108	0.236497	0.444638	0.379407	0.269886	2.01759	1.03991	5.19206
0.4	0.397223	0.192218	0.501131	0.651634	0.350768	0.201145	0.565232	0.447308	0.232642	0.542776	0.306513	0.358514	0.625221	0.341693	0.379866	0.379815	0.190146	0.0718828	0.606953	0.23947	0.22978	0.376885	0.231202	0.218506	0.466634	0.31957	0.242516	0.477079	0.392166	0.281621	2.30601	1.27385	5.91739
0.425	0.405001	0.232071	0.469955	0.68623	0.33076	0.220391	0.508537	0.431493	0.215143	0.49998	0.259966	0.335468	0.642379	0.366534	0.393987	0.41392	0.208636	0.0813989	0.597919	0.245555	0.235303	0.403438	0.21707	0.214874	0.432605	0.331205	0.226722	0.454097	0.396408	0.279277	2.48008	1.46327	6.65143
0.45	0.375065	0.241226	0.4486	0.691982	0.317878	0.244948	0.482728	0.439143	0.209666	0.531707	0.269992	0.310384	0.650992	0.36841	0.413889	0.446216	0.235846	0.0996277	0.556388	0.264875	0.238081	0.423717	0.215108	0.214563	0.478643	0.321592	0.225949	0.440409	0.378384	0.285011	2.61797	1.70127	7.10905
0.475	0.368719	0.236781	0.463838	0.689557	0.335082	0.245523	0.479776	0.424415	0.197093	0.496817	0.269562	0.288784	0.67623	0.378925	0.441578	0.40425	0.245956	0.124213	0.567742	0.258467	0.220706	0.430754	0.219076	0.212321	0.487744	0.315631	0.209363	0.454234	0.382339	0.271321	2.73964	1.81268	7.60542
0.5	0.368536	0.247152	0.464043	0.722239	0.332471	0.250537	0.471258	0.390884	0.186217	0.488643	0.253857	0.272771	0.679212	0.388521	0.43535	0.40548	0.256876	0.156941	0.598828	0.257189	0.233843	0.495062	0.222706	0.206228	0.438498	0.266223	0.197965	0.458087	0.38868	0.253913	2.76057	1.90253	7.9004
0.525	0.350949	0.232815	0.450415	0.820717	0.311242	0.26497	0.463718	0.364197	0.185677	0.511064	0.25022	0.260737	0.661146	0.37812	0.456992	0.396954	0.259527	0.169584	0.520488	0.259514	0.238298	0.485763	0.231925	0.219631	0.455295	0.260195	0.202025	0.459457	0.399063	0.25267	2.64047	2.03445	7.9372
0.55	0.331372	0.223776	0.447204	0.833456	0.302912	0.259966	0.464929	0.348856	0.188419	0.498745	0.24517	0.250521	0.668567	0.36055	0.441268	0.414245	0.273725	0.162706	0.561872	0.262273	0.252452	0.48892	0.239031	0.244304	0.489655	0.272574	0.212193	0.462288	0.421432	0.255421	2.55917	2.0332	7.69434
0.575	0.319701	0.209247	0.444153	0.838583	0.301266	0.258679	0.476936	0.32772	0.180445	0.465147	0.239616	0.242582	0.680859	0.348121	0.437179	0.395031	0.304811	0.185874	0.607026	0.254625	0.254098	0.484092	0.234416	0.26017	0.484973	0.283979	0.215532	0.485174	0.438147	0.259912	2.35456	1.87364	7.03527
0.6	0.324883	0.204204	0.44435	0.803723	0.30264	0.269608	0.479901	0.362808	0.185545	0.51303	0.261666	0.245197	0.696513	0.335703	0.412782	0.381517	0.329243	0.187749	0.617219	0.268831	0.267928	0.503694	0.23639	0.294558	0.469881	0.310553	0.207741	0.508357	0.440276	0.272075	2.07106	1.61422	6.01877
0.625	0.312975	0.213787	0.459825	0.849846	0.281595	0.2791	0.494155	0.337247	0.211534	0.537718	0.256716	0.272562	0.741991	0.322675	0.415288	0.447775	0.339129	0.19926	0.629613	0.284269	0.283381	0.490769	0.256941	0.327038	0.527241	0.333971	0.225632	0.516333	0.434412	0.29401	1.8315	1.42798	5.05059
0.65	0.333501	0.222303	0.491923	0.738528	0.290148	0.292982	0.518458	0.364168	0.218469	0.63342	0.265986	0.30592	0.834098	0.316123	0.404235	0.424697	0.352165	0.224807	0.696538	0.297182	0.312231	0.527064	0.282759	0.318453	0.576881	0.353343	0.256671	0.528205	0.4346	0.291963	1.62625	1.24525	4.16174
0.675	0.321214	0.224853	0.4789	0.641903	0.299951	0.304864	0.516994	0.368893	0.230929	0.575513	0.25852	0.340509	0.813691	0.301394	0.39871	0.469793	0.396045	0.243008	0.718338	0.324579	0.338648	0.540032	0.271519	0.290197	0.557021	0.36806	0.316814	0.566144	0.419031	0.296864	1.56123	1.14332	3.4906
0.7	0.34158	0.232039	0.48604	0.617913	0.308005	0.308401	0.58837	0.380481	0.24576	0.609043	0.268198	0.37917	0.92281	0.303331	0.423194	0.458477	0.473175	0.26889	0.741301	0.358568	0.322373	0.546305	0.274147	0.268836	0.644169	0.362597	0.348121	0.575415	0.41185	0.297016	1.61565	1.18922	3.198
0.725	0.342038	0.239268	0.527969	0.608605	0.330766	0.320553	0.574553	0.39174	0.257722	0.637262	0.288415	0.407468	0.95355	0.300109	0.436425	0.456621	0.537373	0.296363	0.72752	0.371704	0.334036	0.547792	0.289697	0.269121	0.747704	0.364436	0.354937	0.586129	0.429069	0.309073	1.78826	1.38972	3.22159
0.75	0.354386	0.239274	0.544991	0.646359	0.338298	0.330434	0.640009	0.403518	0.271297	0.672223	0.286071	0.500959	0.99273	0.312207	0.474377	0.5289	0.56931	0.321474	0.734614	0.394726	0.330661	0.565386	0.31567	0.279515	0.867317	0.384666	0.36397	0.592923	0.465341	0.337408	2.07472	1.48224	3.29002
0.775	0.38832	0.24397	0.501176	0.691221	0.3544	0.34475	0.657087	0.457772	0.295598	0.708476	0.286061	0.562247	1.05493	0.341059	0.536771	0.550083	0.675092	0.362899	0.814268	0.386074	0.333179	0.602861	0.364891	0.28055	1.04766	0.388971	0.363163	0.58089	0.502586	0.379107	2.35991	1.69568	3.24996
0.8	0.430286	0.26439	0.571905	0.713506	0.386146	0.38855	0.716749	0.463934	0.319308	0.775787	0.311674	0.617559	1.16548	0.367889	0.590772	0.611579	0.703159	0.396185	0.925769	0.395995	0.348064	0.649378	0.439388	0.325179	1.33051	0.414869	0.374265	0.59406	0.521426	0.392051	2.37182	1.62776	3.0263
0.825	0.476972	0.293313	0.575496	0.749459	0.398481	0.46124	0.861924	0.496372	0.350974	0.919384	0.341555	0.646669	1.42689	0.436128	0.645585	0.678356	0.734532	0.422212	1.05349	0.450017	0.366549	0.735661	0.509375	0.389564	1.55937	0.494063	0.415279	0.598588	0.562907	0.446753	2.30731	1.58397	2.64797
0.85	0.541764	0.360838	0.606395	0.764203	0.42038	0.549082	1.06931	0.58346	0.430908	0.922424	0.368417	0.582745	1.4749	0.527678	0.740547	0.805804	0.702844	0.418872	1.1964	0.499265	0.422636	0.861653	0.570817	0.444847	1.80807	0.603088	0.478644	0.643295	0.625802	0.489823	2.33746	1.42963	2.23981
0.875	0.642073	0.452096	0.668629	0.818909	0.48124	0.626532	1.42337	0.734016	0.536629	1.00188	0.410798	0.636831	1.76209	0.650535	0.829686	0.974132	0.680948	0.434397	1.44098	0.561511	0.481749	1.05819	0.630739	0.476792	2.32639	0.753188	0.539081	0.707698	0.669518	0.507885	2.20735	1.27664	1.85688
0.9	0.759816	0.559552	0.77197	0.956277	0.573033	0.685299	1.87736	0.962203	0.659653	1.16516	0.467808	0.751739	2.18304	0.750784	0.86077	1.19	0.745466	0.485209	1.87684	0.645708	0.556835	1.26532	0.731568	0.518768	3.07523	0.985768	0.655032	0.868368	0.779873	0.528833	2.42451	1.22811	1.59874
0.925	0.854469	0.676351	0.966429	1.13192	0.714675	0.727357	2.38572	1.33014	0.833365	1.28949	0.545822	0.870219	2.82736	0.763386	0.832644	1.49416	0.810443	0.540316	2.22355	0.747586	0.663185	1.68437	0.868344	0.618108	4.04948	1.30153	0.843027	1.09915	0.951057	0.595917	2.60775	1.33863	1.53236
0.95	0.957917	0.799334	1.23839	1.46321	0.910252	0.866444	3.25811	1.77827	1.09953	1.68143	0.708655	0.934785	3.64009	0.791182	0.808702	2.03612	0.804662	0.589033	2.04856	0.921879	0.778573	2.32082	1.10863	0.751616	5.50155	1.69952	1.1272	1.41221	1.16122	0.748776	2.53421	1.4893	1.54907
0.975	1.12054	0.929273	1.4956	1.86036	1.17927	1.09905	4.65272	2.10419	1.4606	1.65574	0.873872	0.949396	4.19618	0.965877	0.838102	2.79345	0.939707	0.667092	1.33571	1.22522	0.974793	3.49874	1.4633	1.02254	4.40582	2.29481	1.55085	1.89661	1.44939	0.907388	2.48909	1.82831	1.54337
1	1.54801	1.06851	1.86826	1.81339	1.17625	1.14162	6.16454	2.45037	1.86496	1.69332	1.19282	1.02924	3.4898	1.23195	0.814226	3.9375	0.577551	0.716219	1.40898	1.18256	1.33059	3.91868	1.60924	0.804275	4.11567	2.92055	1.93693	2.23214	1.70127	0.749663	2.4802	2.40828	1.52386

## Sheet: Figure 4 - Panel B
	extracellylar alanine (C12/C13 ratio per µm3)
	parental	ΔdadAXΔalaE	ΔalaE	ΔdadAX
Replicate 1	-1.10715e-12	1.7365e-11	1.1161e-13	3.5855e-11
Replicate 2	2.15965e-11	3.07392e-11	1.2404e-11	8.181e-11
Replicate 3	1.96607e-11	3.68493e-11	1.7272e-11	7.6979e-11

## Sheet: Figure 4 - Panel C
mean vaules correspond to maximum growth rate (h-1)
	parental		∆alaE		∆dadAX		∆alaE∆dadAX
alanine (mM)	Mean	SD	Mean	SD	Mean	SD	Mean	SD
5e-06	0.584364	0.0188099	0.611725	0.0200016	0.612194	0.0156134	0.59364	0.0273517
0.0391	0.561546	0.00544952	0.628699	0.0375359	0.575942	0.00216556	0.443014	0.036183
0.0781	0.569126	0.0127882	0.611008	0.0186138	0.575739	0.00621108	0.364254	0.0238378
0.156	0.588704	0.012114	0.605357	0.012228	0.582521	0.0010913	0.267442	0.0319673
0.313	0.583113	0.0133611	0.595441	0.0245766	0.578731	0.00575908	0.193467	0.0095724
0.625	0.58229	0.00684122	0.555086	0.0181294	0.568084	0.00226327	0.187119	0.00679643
1.25	0.589314	0.010783	0.483828	0.039101	0.546324	0.000146023	0.180965	0.00252735
2.5	0.550653	0.013967	0.37172	0.0117589	0.505103	0.00251778	0.167106	0.00559064
5	0.501087	0.016871	0.305634	0.0175991	0.431027	0.0123485	0.160697	0.0128765
10	0.391214	0.0218171	0.256783	0.0325005	0.317509	0.0172718	0.142242	0.0239465
													kde2086-ala												kde2007-ala												kde2009-ala

## Sheet: Figure 4 - Panel D
Strain	parental	∆alaE	∆dadAX	∆alaE∆dadAX	parental	∆alaE	∆dadAX	∆alaE∆dadAX	parental	∆alaE	∆dadAX	∆alaE∆dadAX	parental	∆alaE	∆dadAX	∆alaE∆dadAX
Condition	ala-	ala-	ala-	ala-	ala+	ala+	ala+	ala+	ala-	ala-	ala-	ala-	ala+	ala+	ala+	ala+
Growth Phase	exponential	exponential	exponential	exponential	exponential	exponential	exponential	exponential	stationary	stationary	stationary	stationary	stationary	stationary	stationary	stationary																									Blank	Blank	Blank	Blank
Replicate 1	1	0.959321	1.09157	1.00962	0.725361	1.04541	0.762067	1.34596	0.656592	1.11926	0.922624	1.0563	1.04712	1.94693	1.08597	3.03115
Replicate 2	1	1.32003	1.06847	0.974274	0.598408	1.00481	0.631219	1.09024	0.858284	0.966741	0.922291	0.985848	0.932025	2.03344	0.84092	2.22101
Replicate 3	1	1.38071	1.37172	1.09025	0.732681	1.12062	0.952826	1.42825	1.17778	1.17606	1.12384	1.33688	0.886668	1.2381	0.961769	1.82751
Replicate 4	1	1.18014	1.19624	0.873779	0.802284	1.06994	0.830908	1.89303	1.00101	1.30368	1.25613	0.951356	0.851371	1.3363	0.977411	1.57686
																																								Blank	Blank	Blank	Blank
