# Supplementary material for: Spatial alanine metabolism determines local growth dynamics of Escherichia coli colonies
Source: eLife. 2021 Nov 9;10:e70794. doi: 10.7554/eLife.70794 (PMC8579308; doi:10.7554/eLife.70794)
Supplement: Figure 5—source data 1. [file elife-70794-fig5-data1.xlsx]

## Sheet: Figure 5 - Panel A
	height (%)
	parental		∆alaE∆dadAX
radius (%)	Mean	SD	Mean	SD
0	1	0	1	0
0.001	0.999914	7.62677e-05	1.00006	0.000144602
0.002	1.00003	5.10483e-05	1	7.92159e-05
0.003	0.999944	0.000111986	1.00001	4.54301e-05
0.004	0.999969	0.000135885	1	0.000101485
0.005	0.99998	8.55113e-05	0.999989	3.44093e-05
0.006	0.999913	4.70026e-05	0.999994	3.23104e-05
0.007	1	4.86775e-05	1.00001	0.000136835
0.008	0.99996	8.55207e-05	1.00003	6.24454e-05
0.009	0.999994	8.74514e-05	1.00001	6.6444e-05
0.01	0.999999	0.000127991	1.00005	0.000131424
0.011	1.00001	7.72183e-05	0.999938	8.75345e-05
0.012	0.999973	0.000137867	0.999978	0.000192645
0.013	0.999918	0.000199232	0.999998	3.40469e-05
0.014	0.999969	0.000145509	0.999987	6.11245e-05
0.015	1.00001	7.6264e-05	1.00003	8.68421e-05
0.016	0.999507	0.000849615	1.00002	2.87623e-05
0.017	0.997077	0.00505351	0.999969	0.000111231
0.018	0.995845	0.00731884	1.00005	0.000121625
0.019	0.997633	0.00382443	1.00003	6.81228e-05
0.02	0.995702	0.00744371	0.999832	0.000227222
0.021	0.996994	0.00525281	1.00011	0.000130036
0.022	0.996305	0.00640096	0.99994	9.68703e-05
0.023	0.997143	0.00490215	1.00003	5.00568e-05
0.024	0.996782	0.00534476	1.00007	0.000134525
0.025	0.996386	0.00656329	0.999999	0.000135003
0.026	0.997647	0.00407092	1.00003	3.10843e-05
0.027	0.99671	0.00546117	1.00001	3.85641e-05
0.028	0.996893	0.00553493	0.999858	0.000195025
0.029	0.996143	0.00656922	1.00007	0.000208105
0.03	0.994343	0.00792683	1.00001	0.000269531
0.031	0.994594	0.00644492	0.999977	9.94519e-05
0.032	0.994512	0.00636568	1.00017	0.000383879
0.033	0.993776	0.00735744	0.999898	0.000153178
0.034	0.995434	0.00635989	0.999997	8.76111e-05
0.035	0.993438	0.0081036	1.00002	0.000155466
0.036	0.993595	0.00822905	0.999947	4.60652e-05
0.037	0.99338	0.00848319	1.00005	4.34402e-05
0.038	0.992957	0.00885909	1.00005	0.000252121
0.039	0.993871	0.00726819	1	0.000191087
0.04	0.991945	0.010891	1	0.0002052
0.041	0.992286	0.00871312	1.00005	0.000101317
0.042	0.990987	0.0108883	0.999923	0.000144275
0.043	0.990254	0.0122661	1.00001	0.000278072
0.044	0.990004	0.0128075	1.00001	0.000167045
0.045	0.989036	0.0132819	1.00001	7.76381e-05
0.046	0.989063	0.0124387	1.00003	0.000157186
0.047	0.988071	0.0136847	1.00001	5.71721e-05
0.048	0.987484	0.0145704	0.999871	0.000137329
0.049	0.986666	0.0143743	0.999357	0.00131044
0.05	0.986571	0.014837	0.997771	0.00388013
0.051	0.985846	0.0154518	0.998712	0.00184963
0.052	0.984512	0.0171129	0.998325	0.00314367
0.053	0.9847	0.0176113	0.998606	0.00218397
0.054	0.984279	0.0170566	0.998606	0.0026653
0.055	0.983194	0.0182334	0.997766	0.00406891
0.056	0.984163	0.0177291	0.997771	0.00384118
0.057	0.983194	0.0189192	0.997025	0.00514527
0.058	0.984372	0.0176227	0.996625	0.00577268
0.059	0.981391	0.0213077	0.996715	0.00524283
0.06	0.982839	0.0202824	0.996488	0.00634481
0.061	0.982029	0.0198553	0.996208	0.00653874
0.062	0.981006	0.0215079	0.996612	0.00565295
0.063	0.982048	0.0200892	0.996597	0.00674223
0.064	0.981416	0.0209359	0.996473	0.00581651
0.065	0.982703	0.019663	0.996083	0.00673446
0.066	0.982015	0.0200833	0.996454	0.00628081
0.067	0.98173	0.0210216	0.996046	0.00664026
0.068	0.981527	0.0216171	0.996229	0.00667378
0.069	0.980394	0.021687	0.996	0.00699933
0.07	0.980586	0.0226049	0.995699	0.00734409
0.071	0.979969	0.0235396	0.995805	0.00753189
0.072	0.978516	0.0255822	0.995526	0.00789901
0.073	0.977033	0.0279782	0.995171	0.00813769
0.074	0.97702	0.028275	0.995607	0.00768342
0.075	0.976327	0.0281579	0.995013	0.00847468
0.076	0.97669	0.0284275	0.995135	0.00843863
0.077	0.976601	0.0278754	0.995327	0.00812623
0.078	0.976453	0.0286091	0.994665	0.00949178
0.079	0.976737	0.0279582	0.99528	0.00812814
0.08	0.975838	0.0281284	0.994521	0.00931013
0.081	0.976478	0.0280097	0.994526	0.00861669
0.082	0.976387	0.0281999	0.993293	0.00827011
0.083	0.975668	0.0278926	0.993883	0.00940659
0.084	0.975908	0.0280483	0.992844	0.00836579
0.085	0.975119	0.0277028	0.992399	0.00893135
0.086	0.975483	0.0278	0.991656	0.00918184
0.087	0.975251	0.0277257	0.991304	0.00794832
0.088	0.975007	0.0275678	0.990165	0.00944739
0.089	0.975272	0.0277183	0.989742	0.00780483
0.09	0.974577	0.0277127	0.986702	0.00536579
0.091	0.975138	0.0276727	0.985354	0.00464051
0.092	0.975147	0.0277504	0.982605	0.00132819
0.093	0.974386	0.0274868	0.982692	0.00247367
0.094	0.97486	0.0275218	0.981012	0.000232447
0.095	0.974206	0.0277424	0.981359	0.00140298
0.096	0.974338	0.0273776	0.981283	0.00298256
0.097	0.973769	0.0276209	0.979797	0.00198435
0.098	0.973449	0.0274915	0.978979	0.00125164
0.099	0.973657	0.0271661	0.97986	0.00248941
0.1	0.973259	0.0277069	0.979279	0.00193194
0.101	0.973514	0.0271555	0.978401	0.00119531
0.102	0.972948	0.027664	0.977595	0.00209555
0.103	0.972476	0.0272887	0.97693	0.00175075
0.104	0.972434	0.0272883	0.976327	0.00401334
0.105	0.972517	0.0275202	0.975803	0.00499008
0.106	0.972388	0.0272269	0.975947	0.00605672
0.107	0.972268	0.0276164	0.974964	0.00479253
0.108	0.972403	0.0273243	0.974302	0.00427649
0.109	0.971642	0.0261127	0.974948	0.00499246
0.11	0.971063	0.0255378	0.973756	0.00459969
0.111	0.971078	0.0250932	0.9735	0.00420188
0.112	0.970402	0.0243514	0.972822	0.00446002
0.113	0.970239	0.023907	0.971625	0.00425964
0.114	0.969409	0.0226938	0.971975	0.00367979
0.115	0.968385	0.022182	0.970266	0.00462311
0.116	0.968339	0.0212614	0.970321	0.00446908
0.117	0.967806	0.021558	0.970248	0.00489541
0.118	0.967986	0.0210594	0.969208	0.0053913
0.119	0.967572	0.0212903	0.969218	0.00535137
0.12	0.967259	0.0205222	0.968739	0.00492505
0.121	0.96742	0.0204195	0.967767	0.00634802
0.122	0.967386	0.0210077	0.969143	0.00300792
0.123	0.967331	0.0202547	0.966992	0.00536973
0.124	0.966769	0.0200179	0.967046	0.00521636
0.125	0.966653	0.0196693	0.967835	0.0050125
0.126	0.966758	0.0197383	0.967355	0.0031378
0.127	0.966624	0.0196873	0.967233	0.00324535
0.128	0.966542	0.0194529	0.96697	0.0043337
0.129	0.966284	0.01915	0.966054	0.00545312
0.13	0.966074	0.0191465	0.965003	0.00744595
0.131	0.966053	0.0188083	0.9638	0.00971906
0.132	0.965555	0.0183817	0.961585	0.0132244
0.133	0.965484	0.0178995	0.961323	0.014107
0.134	0.965027	0.0179122	0.959742	0.0167773
0.135	0.964148	0.0169355	0.959395	0.0159483
0.136	0.964318	0.0161708	0.959568	0.0164741
0.137	0.963806	0.0171678	0.959458	0.0161485
0.138	0.964315	0.0164215	0.959295	0.0161111
0.139	0.963743	0.0165415	0.958623	0.0157834
0.14	0.963513	0.0160494	0.957928	0.014845
0.141	0.963339	0.0157886	0.957033	0.0145341
0.142	0.962872	0.0157499	0.956588	0.0142762
0.143	0.963135	0.0153599	0.95627	0.0137431
0.144	0.96243	0.0152452	0.956336	0.0143574
0.145	0.962952	0.0152511	0.956211	0.0135184
0.146	0.961381	0.0140251	0.955615	0.0141283
0.147	0.96189	0.0145488	0.95557	0.0136366
0.148	0.961907	0.014506	0.9553	0.0136211
0.149	0.961338	0.0144156	0.954807	0.0140797
0.15	0.961878	0.0145976	0.954365	0.0140822
0.151	0.961701	0.0147049	0.953529	0.0153625
0.152	0.961342	0.0153344	0.952384	0.0169567
0.153	0.96167	0.0158297	0.952269	0.0159955
0.154	0.960206	0.016381	0.951033	0.0173978
0.155	0.960922	0.0164676	0.950697	0.0157314
0.156	0.960896	0.0174381	0.950525	0.0170165
0.157	0.960028	0.0175997	0.94895	0.0172317
0.158	0.959717	0.0191579	0.94866	0.017466
0.159	0.959157	0.019674	0.947482	0.0176895
0.16	0.958589	0.0192973	0.946332	0.0183633
0.161	0.958459	0.0206202	0.945851	0.018492
0.162	0.95785	0.0200774	0.944152	0.0192379
0.163	0.958017	0.0208012	0.94395	0.0181011
0.164	0.957662	0.0211383	0.943494	0.0185085
0.165	0.956869	0.020406	0.943251	0.0190984
0.166	0.956964	0.0214011	0.943116	0.0192184
0.167	0.956427	0.0217184	0.942932	0.0188666
0.168	0.955998	0.0216685	0.942916	0.0191642
0.169	0.956444	0.022545	0.942846	0.0188522
0.17	0.955772	0.021981	0.942442	0.0194933
0.171	0.956291	0.0226862	0.942178	0.0192007
0.172	0.955303	0.022155	0.941721	0.0205913
0.173	0.955809	0.0227703	0.941683	0.0212311
0.174	0.95483	0.0226264	0.94186	0.0201664
0.175	0.95388	0.0231027	0.941359	0.0211312
0.176	0.954182	0.0236394	0.941951	0.0210661
0.177	0.953117	0.0230243	0.940582	0.0216317
0.178	0.952924	0.0230728	0.941282	0.0225112
0.179	0.952471	0.0232494	0.940782	0.0212463
0.18	0.951914	0.0236311	0.940611	0.0225785
0.181	0.9524	0.0236521	0.940823	0.0230133
0.182	0.951663	0.0234763	0.940504	0.0221282
0.183	0.951672	0.0232877	0.939966	0.0240043
0.184	0.950789	0.0228693	0.941418	0.0212482
0.185	0.95074	0.0232902	0.940057	0.0235621
0.186	0.949943	0.0225656	0.940345	0.0231862
0.187	0.949447	0.0225408	0.939705	0.0239068
0.188	0.948952	0.0227863	0.938952	0.0251501
0.189	0.948642	0.0222886	0.93951	0.0246831
0.19	0.949106	0.0230008	0.939285	0.0233777
0.191	0.948146	0.0227452	0.938725	0.0249278
0.192	0.948091	0.0226362	0.938536	0.0242934
0.193	0.947327	0.0230212	0.938504	0.0248166
0.194	0.947794	0.0232381	0.938594	0.0238021
0.195	0.947618	0.0228635	0.938269	0.024508
0.196	0.946717	0.0235355	0.937978	0.024743
0.197	0.945284	0.0216059	0.937501	0.0243472
0.198	0.944886	0.0226575	0.936814	0.0242258
0.199	0.94439	0.0221644	0.936138	0.0240631
0.2	0.943909	0.0222494	0.935312	0.0239279
0.201	0.943583	0.0224641	0.934679	0.0237632
0.202	0.943392	0.0223519	0.934371	0.0232014
0.203	0.943013	0.022223	0.933828	0.0235932
0.204	0.942634	0.0221694	0.933415	0.0227236
0.205	0.942066	0.0218867	0.93173	0.0230428
0.206	0.94191	0.0222484	0.93184	0.023415
0.207	0.941568	0.0223432	0.931087	0.0226594
0.208	0.94097	0.0223438	0.930002	0.0232013
0.209	0.940948	0.0223258	0.929841	0.0227855
0.21	0.940994	0.0226945	0.929347	0.0225036
0.211	0.940489	0.0229201	0.928102	0.0228602
0.212	0.940245	0.0222378	0.928218	0.0223731
0.213	0.939577	0.0229885	0.928236	0.0217173
0.214	0.940387	0.0236749	0.926865	0.02246
0.215	0.939562	0.0235439	0.92614	0.0213024
0.216	0.939756	0.0240711	0.925688	0.0219284
0.217	0.939319	0.0238195	0.925848	0.0219263
0.218	0.938892	0.0235796	0.924323	0.0206925
0.219	0.938903	0.0240324	0.924261	0.0219331
0.22	0.938385	0.0239762	0.923066	0.0218467
0.221	0.937696	0.0232762	0.921879	0.0225631
0.222	0.937436	0.0234522	0.920854	0.0226228
0.223	0.936488	0.0223411	0.92018	0.0220926
0.224	0.936405	0.02269	0.91958	0.0234274
0.225	0.936131	0.0231891	0.919141	0.0234371
0.226	0.936041	0.0231986	0.918807	0.0223029
0.227	0.935699	0.0230794	0.91906	0.0225013
0.228	0.935506	0.0230395	0.918715	0.0222397
0.229	0.935236	0.0227388	0.917837	0.0217474
0.23	0.934871	0.0228191	0.917928	0.0221335
0.231	0.93452	0.0222473	0.917093	0.0222183
0.232	0.934718	0.0229146	0.915993	0.0227231
0.233	0.933862	0.0225105	0.914991	0.0227413
0.234	0.934281	0.0223742	0.91404	0.0237657
0.235	0.933737	0.0228977	0.914049	0.023355
0.236	0.933416	0.02182	0.913919	0.0237462
0.237	0.932709	0.021855	0.913332	0.0240769
0.238	0.93237	0.0214311	0.913153	0.0239414
0.239	0.931472	0.020844	0.912908	0.0242023
0.24	0.931427	0.0210837	0.912342	0.0242211
0.241	0.930833	0.0204862	0.912246	0.0243288
0.242	0.930615	0.0206449	0.91186	0.0246965
0.243	0.930116	0.0205187	0.912003	0.0246306
0.244	0.929519	0.0203887	0.912237	0.0236356
0.245	0.929485	0.0201719	0.911387	0.023982
0.246	0.928521	0.0195324	0.910911	0.0239611
0.247	0.927689	0.0192644	0.909942	0.0250816
0.248	0.927924	0.0192457	0.909677	0.0248532
0.249	0.927008	0.0180925	0.90976	0.0246728
0.25	0.926859	0.0187448	0.909546	0.0248675
0.251	0.926755	0.0179654	0.909222	0.0254224
0.252	0.926313	0.0180182	0.908052	0.0265274
0.253	0.926117	0.0178819	0.907727	0.026764
0.254	0.925799	0.0174356	0.907463	0.0268225
0.255	0.92558	0.0170216	0.90643	0.0274612
0.256	0.925378	0.0175249	0.905668	0.02741
0.257	0.925065	0.0169092	0.905198	0.0279771
0.258	0.924636	0.0178269	0.904796	0.0279243
0.259	0.924243	0.0180045	0.904873	0.0280813
0.26	0.923627	0.0184294	0.903773	0.0282885
0.261	0.923443	0.0185419	0.904246	0.0280365
0.262	0.923216	0.0182467	0.903975	0.0282249
0.263	0.922839	0.0182557	0.90281	0.0286394
0.264	0.922468	0.017727	0.902653	0.0280924
0.265	0.921931	0.0173807	0.902034	0.0281738
0.266	0.921443	0.0171682	0.901449	0.0284455
0.267	0.921116	0.0171579	0.901207	0.0280767
0.268	0.920621	0.0173163	0.900492	0.0284148
0.269	0.920164	0.0169023	0.899934	0.0287712
0.27	0.919995	0.0166111	0.898727	0.0290219
0.271	0.919587	0.0171402	0.898443	0.0287508
0.272	0.919304	0.0162372	0.898329	0.0288694
0.273	0.919485	0.0170369	0.897493	0.0292824
0.274	0.91888	0.0165952	0.897188	0.029141
0.275	0.918535	0.0169617	0.896612	0.0294152
0.276	0.918173	0.0170783	0.896567	0.0290539
0.277	0.918087	0.0169001	0.896568	0.0287998
0.278	0.917958	0.0169178	0.895713	0.0291588
0.279	0.917566	0.0172422	0.895154	0.0285441
0.28	0.917389	0.0169703	0.895208	0.0290002
0.281	0.917065	0.0174703	0.894477	0.0286357
0.282	0.916761	0.0171182	0.894514	0.0288101
0.283	0.916817	0.0170058	0.89358	0.0290615
0.284	0.916677	0.0168524	0.893134	0.0282534
0.285	0.916471	0.0166637	0.89327	0.0289432
0.286	0.916043	0.0169827	0.892334	0.0283335
0.287	0.915469	0.0172207	0.891794	0.0286173
0.288	0.915299	0.0167817	0.891943	0.0282527
0.289	0.914897	0.0169279	0.891393	0.0280969
0.29	0.91447	0.016841	0.891168	0.0278158
0.291	0.9143	0.0173737	0.890891	0.0274467
0.292	0.913969	0.0172335	0.891291	0.0261869
0.293	0.913502	0.0171729	0.891139	0.0264733
0.294	0.913155	0.017722	0.889691	0.0263741
0.295	0.912851	0.0180313	0.89022	0.0268325
0.296	0.912707	0.0188719	0.889072	0.0264433
0.297	0.912197	0.0187474	0.889191	0.0258012
0.298	0.912227	0.0188717	0.889299	0.0256656
0.299	0.911604	0.0189721	0.887695	0.0260432
0.3	0.911619	0.01901	0.886531	0.0267068
0.301	0.911393	0.0197852	0.885702	0.0269845
0.302	0.91096	0.0194527	0.88382	0.0277403
0.303	0.911022	0.0195214	0.883402	0.0277574
0.304	0.910554	0.0195512	0.882721	0.0276078
0.305	0.910238	0.0191279	0.882683	0.0278046
0.306	0.910064	0.0193099	0.881674	0.0271438
0.307	0.9089	0.0190354	0.880822	0.0270372
0.308	0.909137	0.0191599	0.880379	0.0276856
0.309	0.908304	0.0189546	0.879861	0.0274587
0.31	0.908182	0.0185283	0.879273	0.0281337
0.311	0.907475	0.0182683	0.879262	0.0278407
0.312	0.906745	0.0180454	0.87799	0.0283981
0.313	0.906183	0.0175517	0.877867	0.0285805
0.314	0.905701	0.0179256	0.877095	0.0289755
0.315	0.905075	0.0171585	0.877278	0.02866
0.316	0.904354	0.0177597	0.876996	0.029107
0.317	0.903216	0.0165668	0.877215	0.0290757
0.318	0.902721	0.0166227	0.876791	0.0292973
0.319	0.90258	0.0167879	0.876752	0.0295538
0.32	0.901713	0.016265	0.876499	0.0294306
0.321	0.901798	0.0166771	0.875701	0.0290501
0.322	0.901401	0.01668	0.874924	0.029445
0.323	0.901097	0.0168537	0.875105	0.0292054
0.324	0.900352	0.0164526	0.874265	0.0298447
0.325	0.900353	0.0165471	0.874538	0.029777
0.326	0.89978	0.0162887	0.8745	0.0299028
0.327	0.899822	0.0166125	0.873783	0.0302807
0.328	0.899392	0.0166894	0.873205	0.030607
0.329	0.898949	0.0164961	0.872944	0.0307678
0.33	0.898342	0.0167689	0.872442	0.0311002
0.331	0.897392	0.0169973	0.872485	0.0310941
0.332	0.897499	0.017136	0.871955	0.0312379
0.333	0.896254	0.0172817	0.871703	0.0315019
0.334	0.896177	0.0169674	0.870951	0.0318347
0.335	0.895125	0.01678	0.870571	0.0321631
0.336	0.89494	0.017268	0.870454	0.0322002
0.337	0.894464	0.0171448	0.86966	0.0325625
0.338	0.893814	0.0171089	0.868955	0.0331512
0.339	0.894095	0.0174288	0.868088	0.0336065
0.34	0.893549	0.0171078	0.86723	0.0341528
0.341	0.893476	0.0171543	0.867046	0.0343697
0.342	0.893189	0.0168946	0.866517	0.0342702
0.343	0.892824	0.0168556	0.866036	0.0341006
0.344	0.892863	0.0170212	0.866635	0.034099
0.345	0.892389	0.0169458	0.865108	0.0337322
0.346	0.892092	0.01705	0.865535	0.0340778
0.347	0.891778	0.0169736	0.86481	0.0339919
0.348	0.89159	0.0171974	0.864249	0.0335318
0.349	0.89144	0.0166996	0.863886	0.0333859
0.35	0.891396	0.0173371	0.863164	0.0326528
0.351	0.890713	0.01711	0.862746	0.0321656
0.352	0.890775	0.0169974	0.862887	0.03176
0.353	0.88975	0.0177353	0.862035	0.0315416
0.354	0.889913	0.0169104	0.861924	0.0313262
0.355	0.889989	0.0176956	0.860774	0.0320155
0.356	0.889433	0.0173751	0.860837	0.0314226
0.357	0.88988	0.017655	0.86063	0.0322589
0.358	0.889609	0.0177487	0.859721	0.0318807
0.359	0.889662	0.0178989	0.859396	0.0317272
0.36	0.889148	0.0183267	0.85869	0.032041
0.361	0.888584	0.0181523	0.85781	0.0318407
0.362	0.888964	0.0186542	0.857901	0.0318719
0.363	0.88843	0.0185212	0.856151	0.0319253
0.364	0.887996	0.0185958	0.855556	0.0320605
0.365	0.887924	0.0189618	0.854927	0.0321204
0.366	0.887258	0.0186692	0.854057	0.0321176
0.367	0.886805	0.0189751	0.85394	0.031526
0.368	0.885507	0.0189809	0.853236	0.0315417
0.369	0.885378	0.01882	0.852959	0.0315772
0.37	0.884443	0.0191524	0.852325	0.0312981
0.371	0.883792	0.0194469	0.852246	0.0314336
0.372	0.883602	0.019437	0.852162	0.0313824
0.373	0.882354	0.019897	0.851369	0.0316954
0.374	0.882476	0.0184938	0.850859	0.0319471
0.375	0.88164	0.0194653	0.850082	0.0321108
0.376	0.881724	0.0189763	0.848646	0.0330757
0.377	0.881012	0.018845	0.848563	0.0326464
0.378	0.880869	0.0193126	0.84692	0.0333786
0.379	0.880328	0.0188074	0.846178	0.033954
0.38	0.879505	0.0187632	0.84549	0.0344168
0.381	0.878702	0.0186664	0.844588	0.0347685
0.382	0.878121	0.0186187	0.844301	0.0353963
0.383	0.8784	0.0194061	0.843651	0.0351269
0.384	0.877706	0.0191802	0.842984	0.0353969
0.385	0.877592	0.0196887	0.843293	0.0344851
0.386	0.877584	0.0197419	0.841954	0.0350303
0.387	0.876536	0.0197062	0.84237	0.0349935
0.388	0.876219	0.0197895	0.84152	0.0347496
0.389	0.875407	0.0190802	0.840687	0.0349242
0.39	0.874729	0.0191485	0.840661	0.034907
0.391	0.87409	0.019181	0.840007	0.0350576
0.392	0.87395	0.0191165	0.838962	0.0357248
0.393	0.872906	0.0194425	0.838551	0.0360803
0.394	0.872052	0.0194059	0.837411	0.0364086
0.395	0.871127	0.0196598	0.837434	0.0359538
0.396	0.870518	0.019744	0.83669	0.0357513
0.397	0.870156	0.0204373	0.836225	0.0355873
0.398	0.869674	0.0203632	0.836114	0.0356024
0.399	0.869042	0.020108	0.835455	0.0361694
0.4	0.868879	0.0201014	0.833988	0.0364782
0.401	0.868615	0.020164	0.833095	0.0358279
0.402	0.868613	0.0202705	0.833002	0.0354349
0.403	0.868333	0.019846	0.832841	0.035191
0.404	0.868179	0.0199826	0.831952	0.0354382
0.405	0.867663	0.0197637	0.831455	0.0354225
0.406	0.867085	0.0191101	0.830927	0.0353111
0.407	0.866617	0.0192902	0.829492	0.035655
0.408	0.866256	0.0193573	0.829977	0.0339427
0.409	0.866297	0.0195752	0.828341	0.0340949
0.41	0.865958	0.0194224	0.828259	0.0333025
0.411	0.865802	0.0187888	0.828379	0.0330469
0.412	0.86513	0.0189615	0.827671	0.0324631
0.413	0.864674	0.0184141	0.827215	0.0324248
0.414	0.864705	0.0181917	0.826193	0.0327987
0.415	0.864268	0.0181204	0.824852	0.0332787
0.416	0.864371	0.0178855	0.82448	0.0331169
0.417	0.864343	0.0179581	0.821994	0.0343623
0.418	0.863709	0.0178802	0.822832	0.0336588
0.419	0.863745	0.0182225	0.82206	0.033554
0.42	0.863224	0.0185944	0.821905	0.0335551
0.421	0.862991	0.0184892	0.821633	0.0335362
0.422	0.862339	0.0180811	0.820025	0.0337728
0.423	0.861324	0.0176688	0.819044	0.0348016
0.424	0.860526	0.0173192	0.818071	0.0343086
0.425	0.860028	0.0175861	0.81713	0.0350653
0.426	0.8595	0.0178092	0.817639	0.0338868
0.427	0.858856	0.0180369	0.81624	0.0346542
0.428	0.858992	0.0181486	0.815583	0.0353354
0.429	0.858368	0.0182085	0.815028	0.0354749
0.43	0.857877	0.0186579	0.81346	0.0358886
0.431	0.857298	0.0187284	0.813212	0.0358058
0.432	0.857035	0.019096	0.812229	0.0363156
0.433	0.856783	0.019093	0.811378	0.036733
0.434	0.856639	0.0191061	0.810982	0.036888
0.435	0.856609	0.0197399	0.809852	0.0372583
0.436	0.855575	0.0201734	0.809959	0.0371921
0.437	0.855694	0.0203083	0.810193	0.0369346
0.438	0.854916	0.020277	0.809151	0.0368704
0.439	0.854492	0.0199942	0.809324	0.0368948
0.44	0.854412	0.0207679	0.807964	0.0371839
0.441	0.853602	0.0206584	0.807766	0.0367959
0.442	0.853282	0.0210747	0.806318	0.0370576
0.443	0.852413	0.0209813	0.804955	0.0371409
0.444	0.852827	0.0212619	0.804101	0.0368746
0.445	0.852442	0.0215119	0.803192	0.0362494
0.446	0.851567	0.0214455	0.802538	0.036245
0.447	0.851776	0.0221684	0.801865	0.0358026
0.448	0.85107	0.0225716	0.799417	0.0361526
0.449	0.850867	0.0227217	0.798793	0.0357755
0.45	0.850859	0.0227934	0.797286	0.035286
0.451	0.849365	0.0231594	0.796593	0.0351224
0.452	0.849237	0.0225764	0.796332	0.0345446
0.453	0.848235	0.0233066	0.795412	0.0342826
0.454	0.847242	0.0237507	0.79477	0.0337793
0.455	0.847026	0.0232324	0.794574	0.0334277
0.456	0.846865	0.0237339	0.793847	0.0334072
0.457	0.846302	0.0235923	0.793949	0.0326735
0.458	0.846364	0.0243497	0.792935	0.0330381
0.459	0.845847	0.0241829	0.793691	0.0320339
0.46	0.84546	0.0242639	0.792133	0.0319517
0.461	0.845094	0.0244215	0.791016	0.0328427
0.462	0.844226	0.0242869	0.79097	0.032581
0.463	0.844026	0.024992	0.789067	0.0330864
0.464	0.843273	0.0250014	0.78875	0.0336395
0.465	0.843381	0.0256486	0.787937	0.0335282
0.466	0.842766	0.0252413	0.785221	0.0353562
0.467	0.841896	0.0243582	0.784816	0.035301
0.468	0.841465	0.0245501	0.785123	0.034767
0.469	0.839676	0.0229605	0.784559	0.0349203
0.47	0.839655	0.0235431	0.785782	0.0334118
0.471	0.838738	0.0238909	0.784294	0.0336528
0.472	0.838068	0.0242342	0.783993	0.0330956
0.473	0.837503	0.0240572	0.782979	0.0331407
0.474	0.835548	0.0227614	0.782006	0.0336611
0.475	0.835745	0.0240028	0.779665	0.0317254
0.476	0.83478	0.0226812	0.778953	0.0328178
0.477	0.834056	0.0220886	0.77745	0.0334532
0.478	0.833555	0.0214861	0.776509	0.0332461
0.479	0.833715	0.0207642	0.77478	0.0338372
0.48	0.83262	0.0209139	0.774823	0.0326255
0.481	0.832589	0.0209152	0.773856	0.0331397
0.482	0.832167	0.021168	0.773472	0.0330325
0.483	0.831795	0.0212976	0.77228	0.0325065
0.484	0.831726	0.0215245	0.770729	0.0335145
0.485	0.830841	0.0207865	0.768974	0.0339046
0.486	0.830412	0.0216098	0.767553	0.0343008
0.487	0.830143	0.0212254	0.766591	0.0353893
0.488	0.828869	0.0215717	0.765507	0.033717
0.489	0.829175	0.0218761	0.764033	0.0340396
0.49	0.828269	0.0208019	0.764051	0.0324504
0.491	0.828601	0.0218431	0.76356	0.0324299
0.492	0.827707	0.0215152	0.762495	0.0324772
0.493	0.827674	0.022015	0.76301	0.0313066
0.494	0.827215	0.0221944	0.761912	0.0314116
0.495	0.826858	0.0212263	0.761671	0.0306621
0.496	0.827041	0.0225904	0.761411	0.0298916
0.497	0.825264	0.0215195	0.759901	0.0306824
0.498	0.824677	0.0232322	0.759603	0.0289521
0.499	0.823203	0.0232427	0.758398	0.0292122
0.5	0.821821	0.0235632	0.755005	0.0314366
0.501	0.821602	0.0255603	0.756698	0.0298618
0.502	0.820328	0.0251292	0.753913	0.032075
0.503	0.820473	0.0262227	0.755955	0.0299102
0.504	0.819842	0.0256273	0.755483	0.0303801
0.505	0.819196	0.0255162	0.754106	0.0308108
0.506	0.819081	0.0258701	0.753531	0.0293238
0.507	0.817644	0.0263891	0.753292	0.0283073
0.508	0.816307	0.02726	0.752763	0.0281958
0.509	0.814904	0.0276836	0.751506	0.0278401
0.51	0.813228	0.0282014	0.749329	0.0289241
0.511	0.812821	0.0288861	0.747814	0.0279483
0.512	0.811042	0.0297055	0.746806	0.0285882
0.513	0.811374	0.0278907	0.744567	0.027946
0.514	0.811389	0.0281899	0.74272	0.02923
0.515	0.811335	0.0279754	0.741094	0.029286
0.516	0.811364	0.0282245	0.740005	0.0290113
0.517	0.810549	0.0277374	0.738582	0.0293921
0.518	0.809752	0.0272225	0.736907	0.0300235
0.519	0.810213	0.0283131	0.736306	0.0297671
0.52	0.808923	0.0268395	0.734718	0.0300406
0.521	0.80977	0.0277768	0.735235	0.0282158
0.522	0.808998	0.0266761	0.734159	0.0281928
0.523	0.808553	0.0257785	0.733404	0.0277237
0.524	0.808197	0.0265902	0.733564	0.0267075
0.525	0.806392	0.0263043	0.732018	0.0273658
0.526	0.806668	0.0270137	0.730846	0.0269402
0.527	0.805762	0.0265273	0.730222	0.0285029
0.528	0.805152	0.0266205	0.727489	0.0300028
0.529	0.804845	0.0271999	0.726499	0.0286591
0.53	0.804018	0.0261071	0.726257	0.0286343
0.531	0.803367	0.026422	0.72589	0.0278117
0.532	0.802126	0.025696	0.729108	0.0253248
0.533	0.801419	0.0253833	0.725449	0.0269327
0.534	0.800825	0.025845	0.726417	0.0249347
0.535	0.799287	0.0251953	0.725461	0.0247019
0.536	0.797782	0.0258082	0.723498	0.0252015
0.537	0.797404	0.0260369	0.722652	0.0242897
0.538	0.79538	0.026101	0.722362	0.0241443
0.539	0.793787	0.0273188	0.720142	0.0234937
0.54	0.792297	0.0276127	0.720558	0.0232702
0.541	0.790951	0.0288705	0.716609	0.0248362
0.542	0.79034	0.0301634	0.71382	0.0264015
0.543	0.789374	0.0309825	0.711769	0.0268858
0.544	0.788848	0.0313025	0.71073	0.0271762
0.545	0.788946	0.0304679	0.709904	0.0272579
0.546	0.788068	0.0293097	0.709012	0.0269803
0.547	0.787483	0.0290057	0.708128	0.0266632
0.548	0.787204	0.0276851	0.706987	0.0259347
0.549	0.785583	0.0291278	0.705592	0.0248314
0.55	0.785024	0.0288014	0.704701	0.0245574
0.551	0.784075	0.0278126	0.703307	0.0244178
0.552	0.783512	0.0283672	0.702752	0.0240482
0.553	0.782091	0.026794	0.70178	0.0244134
0.554	0.781345	0.0275814	0.701056	0.0236694
0.555	0.781	0.0270916	0.701282	0.0236516
0.556	0.780471	0.0271338	0.698996	0.023553
0.557	0.779623	0.0274983	0.697885	0.0236392
0.558	0.777851	0.0269567	0.697259	0.0231372
0.559	0.777024	0.0278139	0.695812	0.0223756
0.56	0.776005	0.0273059	0.696648	0.0208469
0.561	0.775163	0.0258765	0.695823	0.0215006
0.562	0.775136	0.0250251	0.694334	0.0202027
0.563	0.774873	0.024168	0.694892	0.0200996
0.564	0.774327	0.0246891	0.691333	0.0199466
0.565	0.773223	0.0250339	0.693561	0.0197193
0.566	0.77168	0.0248828	0.691953	0.0195497
0.567	0.770349	0.0263692	0.689504	0.0211604
0.568	0.768197	0.0272205	0.68727	0.0226948
0.569	0.766345	0.02775	0.684305	0.0239217
0.57	0.765267	0.0287147	0.683161	0.0244493
0.571	0.764328	0.0285443	0.682301	0.0239267
0.572	0.764473	0.027963	0.67862	0.0247583
0.573	0.76321	0.0291583	0.679278	0.0228229
0.574	0.762833	0.0293799	0.678489	0.0227722
0.575	0.762119	0.0304612	0.677174	0.0226506
0.576	0.761127	0.0303959	0.676984	0.0230272
0.577	0.76014	0.0303004	0.676417	0.0204958
0.578	0.759174	0.030496	0.675876	0.0206191
0.579	0.758483	0.0305011	0.673709	0.0206084
0.58	0.759117	0.0306047	0.672367	0.0217191
0.581	0.758177	0.0302258	0.670622	0.0222129
0.582	0.758226	0.0289705	0.668968	0.0223504
0.583	0.757505	0.0294042	0.668184	0.021065
0.584	0.755533	0.0300554	0.667284	0.0199411
0.585	0.753111	0.030276	0.666108	0.0192613
0.586	0.751041	0.0292139	0.66554	0.0185017
0.587	0.749745	0.0289689	0.664034	0.0185408
0.588	0.749198	0.02819	0.664347	0.0193595
0.589	0.748581	0.0276291	0.663229	0.0184248
0.59	0.747835	0.0279079	0.662141	0.0191044
0.591	0.746534	0.027362	0.661774	0.0193099
0.592	0.74575	0.0264138	0.659025	0.0204613
0.593	0.744478	0.0256295	0.658764	0.0204762
0.594	0.742973	0.0249205	0.657957	0.0193392
0.595	0.740947	0.0251784	0.656062	0.0198905
0.596	0.739439	0.025831	0.654353	0.0202162
0.597	0.737655	0.0269794	0.652719	0.0207886
0.598	0.737095	0.0276306	0.650363	0.0222143
0.599	0.736852	0.0278773	0.648817	0.0228986
0.6	0.737001	0.0272453	0.647077	0.0224604
0.601	0.736008	0.0279273	0.646201	0.0228089
0.602	0.734796	0.0283912	0.645687	0.0207534
0.603	0.733173	0.0289277	0.644161	0.0202432
0.604	0.731801	0.029769	0.642828	0.0201418
0.605	0.729979	0.0303853	0.642608	0.0194577
0.606	0.729103	0.0294571	0.640831	0.01917
0.607	0.729379	0.0288109	0.639349	0.0183489
0.608	0.730195	0.0286591	0.638188	0.0178159
0.609	0.728596	0.0292448	0.63635	0.0181537
0.61	0.726417	0.0297615	0.634285	0.018785
0.611	0.725197	0.0314586	0.632584	0.0195757
0.612	0.723462	0.0317153	0.631017	0.0207183
0.613	0.722689	0.0333759	0.628911	0.0227371
0.614	0.722197	0.0332153	0.628653	0.0216636
0.615	0.721262	0.0325593	0.629112	0.0201709
0.616	0.721785	0.031121	0.630122	0.0189863
0.617	0.72059	0.0284615	0.629046	0.0181497
0.618	0.71973	0.0278776	0.628354	0.0185168
0.619	0.717543	0.0275248	0.626942	0.0185124
0.62	0.715237	0.0272676	0.624466	0.019133
0.621	0.712701	0.0263839	0.622483	0.0194586
0.622	0.71067	0.0275913	0.620844	0.0185799
0.623	0.710344	0.0272616	0.619065	0.0187291
0.624	0.710319	0.0268908	0.618116	0.0195431
0.625	0.709368	0.027513	0.6157	0.0201638
0.626	0.707189	0.0285396	0.615374	0.0191229
0.627	0.70547	0.0285956	0.612271	0.0209363
0.628	0.704278	0.0288573	0.61	0.0208432
0.629	0.702877	0.0292565	0.609857	0.0205096
0.63	0.702191	0.0281565	0.609874	0.0180453
0.631	0.701448	0.0277182	0.610109	0.0175848
0.632	0.700124	0.0279226	0.609244	0.0172613
0.633	0.699052	0.0281839	0.606094	0.0183331
0.634	0.697896	0.0282439	0.602967	0.0205114
0.635	0.695481	0.0308661	0.600829	0.0208118
0.636	0.693962	0.0325525	0.598944	0.0219076
0.637	0.693098	0.0328946	0.598698	0.022134
0.638	0.69322	0.0331575	0.599818	0.0208612
0.639	0.693787	0.0326759	0.601061	0.0193787
0.64	0.693944	0.031218	0.601044	0.0184182
0.641	0.694364	0.0287334	0.599205	0.0180978
0.642	0.692839	0.0278312	0.597645	0.0181773
0.643	0.691272	0.0277903	0.596056	0.0182741
0.644	0.688631	0.0269616	0.594363	0.0186503
0.645	0.686265	0.0290004	0.592097	0.0196491
0.646	0.68446	0.0295182	0.589962	0.0210229
0.647	0.681945	0.0284522	0.588597	0.0203358
0.648	0.679922	0.0303555	0.586542	0.02106
0.649	0.678197	0.03078	0.585666	0.0216057
0.65	0.67684	0.030607	0.583634	0.0223706
0.651	0.674339	0.0312804	0.582758	0.0216769
0.652	0.673133	0.0302361	0.582174	0.0208873
0.653	0.672087	0.0298587	0.580605	0.0192588
0.654	0.671497	0.0297665	0.579518	0.0201279
0.655	0.670536	0.0289871	0.578109	0.0188693
0.656	0.669062	0.0294332	0.57671	0.0198094
0.657	0.667439	0.0288593	0.577506	0.0191327
0.658	0.664905	0.0297264	0.573801	0.0205216
0.659	0.662455	0.0306125	0.573402	0.0211832
0.66	0.662624	0.0305632	0.571782	0.0217761
0.661	0.663947	0.0300983	0.569448	0.0226664
0.662	0.664728	0.03016	0.569196	0.0223338
0.663	0.666292	0.0307246	0.569492	0.0207907
0.664	0.665624	0.0301784	0.569422	0.020079
0.665	0.664514	0.0287051	0.570086	0.0194982
0.666	0.662422	0.029425	0.567654	0.0194527
0.667	0.660237	0.0289393	0.565553	0.0206462
0.668	0.658102	0.0306322	0.562422	0.0219361
0.669	0.654274	0.0318905	0.560522	0.0228295
0.67	0.650871	0.0316771	0.55921	0.0232708
0.671	0.649261	0.0321491	0.55833	0.02296
0.672	0.646304	0.0312309	0.556605	0.0229545
0.673	0.64495	0.0307236	0.554799	0.0225828
0.674	0.64337	0.0309229	0.552662	0.0226985
0.675	0.640323	0.0293016	0.551309	0.023097
0.676	0.64037	0.0294353	0.55064	0.0230484
0.677	0.638621	0.0294475	0.55165	0.0210903
0.678	0.638031	0.0292942	0.550725	0.0199717
0.679	0.636045	0.0290677	0.550167	0.0200484
0.68	0.635176	0.029723	0.54945	0.0199848
0.681	0.635309	0.029833	0.545359	0.0216477
0.682	0.636924	0.0291611	0.544912	0.0216712
0.683	0.636764	0.0292222	0.543803	0.0204925
0.684	0.636214	0.0292276	0.541831	0.0210822
0.685	0.634663	0.0310126	0.540452	0.0214573
0.686	0.633223	0.0320949	0.539179	0.0220275
0.687	0.632423	0.0310721	0.538713	0.0221151
0.688	0.631478	0.0298981	0.539755	0.0209468
0.689	0.629967	0.031381	0.537676	0.0214856
0.69	0.627967	0.030269	0.536691	0.0220758
0.691	0.623785	0.0324266	0.533572	0.0229034
0.692	0.618929	0.0323996	0.531166	0.0255197
0.693	0.615274	0.0317577	0.529752	0.0255695
0.694	0.613564	0.0317944	0.529504	0.0251102
0.695	0.611496	0.0300222	0.52705	0.0265794
0.696	0.610852	0.0304682	0.526716	0.0248124
0.697	0.60934	0.030225	0.524506	0.0255761
0.698	0.607704	0.0290447	0.524535	0.0242994
0.699	0.608224	0.0294977	0.523891	0.0235552
0.7	0.606993	0.0279454	0.522661	0.0232823
0.701	0.607464	0.0285856	0.522206	0.0221746
0.702	0.608219	0.0273265	0.521231	0.0216752
0.703	0.606769	0.027528	0.520702	0.0212221
0.704	0.606286	0.0296496	0.519751	0.0201042
0.705	0.603454	0.0315014	0.517591	0.0204604
0.706	0.601706	0.032916	0.515482	0.0214041
0.707	0.602495	0.0315614	0.513354	0.0231209
0.708	0.602069	0.0299449	0.512192	0.0227533
0.709	0.601602	0.0302671	0.511909	0.0222731
0.71	0.598819	0.0305452	0.51095	0.0217447
0.711	0.593303	0.0326301	0.509939	0.0212814
0.712	0.588978	0.0330844	0.508502	0.021588
0.713	0.585303	0.0322	0.506655	0.0221758
0.714	0.583246	0.0327402	0.503992	0.0238964
0.715	0.581337	0.0329836	0.502083	0.0258374
0.716	0.580455	0.0315719	0.501242	0.0253282
0.717	0.579646	0.0314033	0.499047	0.0267079
0.718	0.579488	0.0288921	0.496222	0.0289231
0.719	0.579772	0.0263765	0.495989	0.0272284
0.72	0.579712	0.0261696	0.494468	0.0287347
0.721	0.578127	0.0262404	0.494365	0.027046
0.722	0.577295	0.0287008	0.494903	0.0253471
0.723	0.574406	0.0309011	0.495032	0.0242064
0.724	0.572994	0.0326405	0.494364	0.0234725
0.725	0.573386	0.0311778	0.493191	0.0235609
0.726	0.573677	0.031128	0.491157	0.0244919
0.727	0.573615	0.0318589	0.490834	0.0232343
0.728	0.570819	0.0321019	0.488516	0.0238307
0.729	0.567287	0.0329989	0.488517	0.021706
0.73	0.562855	0.0319652	0.488059	0.0221
0.731	0.558694	0.03124	0.486128	0.0220096
0.732	0.555869	0.0322217	0.484402	0.0230463
0.733	0.554281	0.0325814	0.481983	0.0234104
0.734	0.55334	0.0330087	0.479479	0.0239537
0.735	0.551483	0.0331272	0.478722	0.0239153
0.736	0.552047	0.0296797	0.477911	0.0231235
0.737	0.551038	0.028409	0.477304	0.0227066
0.738	0.549818	0.0262885	0.476805	0.0226653
0.739	0.549043	0.0264275	0.475031	0.0232715
0.74	0.546877	0.028617	0.473595	0.0239447
0.741	0.544983	0.0298497	0.47129	0.0249299
0.742	0.545278	0.0296302	0.46949	0.0261736
0.743	0.544635	0.0305892	0.466628	0.0285822
0.744	0.544866	0.0318782	0.465492	0.0281932
0.745	0.542232	0.0351674	0.465372	0.0283473
0.746	0.540201	0.0335118	0.464043	0.0280133
0.747	0.536879	0.0321151	0.4627	0.0284813
0.748	0.533931	0.0320191	0.462664	0.0276477
0.749	0.530887	0.0321683	0.461532	0.0274832
0.75	0.528766	0.0312393	0.461706	0.026478
0.751	0.525832	0.0319064	0.461517	0.025524
0.752	0.524534	0.0320515	0.460115	0.0255676
0.753	0.522826	0.0317441	0.46019	0.0248003
0.754	0.52191	0.0299658	0.457952	0.0247924
0.755	0.521358	0.0277234	0.456156	0.024789
0.756	0.519741	0.0258841	0.454226	0.0249286
0.757	0.518365	0.026556	0.451377	0.02602
0.758	0.517369	0.0288423	0.450184	0.0265085
0.759	0.515939	0.0304445	0.447749	0.0267996
0.76	0.515219	0.0314244	0.447274	0.0262544
0.761	0.514428	0.0317574	0.447162	0.0244815
0.762	0.513779	0.0327816	0.446741	0.024212
0.763	0.511111	0.0350895	0.447236	0.0234882
0.764	0.508536	0.0360028	0.447669	0.0219046
0.765	0.506261	0.0344677	0.447324	0.0217274
0.766	0.503549	0.030551	0.445239	0.0228412
0.767	0.501542	0.0284385	0.44014	0.0256166
0.768	0.498734	0.0305535	0.436054	0.0289053
0.769	0.496112	0.0322161	0.433579	0.0297234
0.77	0.494394	0.0324721	0.432794	0.0295812
0.771	0.493709	0.030171	0.433564	0.0288579
0.772	0.492735	0.0272197	0.432056	0.0289947
0.773	0.491174	0.026857	0.430612	0.0298733
0.774	0.489565	0.0284258	0.430654	0.0288303
0.775	0.487932	0.029531	0.430133	0.0283411
0.776	0.486565	0.0301199	0.429786	0.0273497
0.777	0.48604	0.0306724	0.428319	0.0270241
0.778	0.485512	0.0325275	0.426838	0.02687
0.779	0.48355	0.0338412	0.425431	0.0262096
0.78	0.480122	0.034457	0.423214	0.0263493
0.781	0.477911	0.0346414	0.422541	0.0268187
0.782	0.47715	0.0343577	0.42097	0.0262191
0.783	0.475921	0.0323779	0.419639	0.0275194
0.784	0.473496	0.0306058	0.418454	0.0264663
0.785	0.471147	0.0304684	0.417899	0.0263885
0.786	0.468318	0.0314013	0.41849	0.0241928
0.787	0.466785	0.030582	0.418211	0.0231344
0.788	0.464221	0.029659	0.41723	0.0233945
0.789	0.461416	0.0274732	0.415542	0.0236377
0.79	0.460964	0.0279761	0.412919	0.0244815
0.791	0.459351	0.0287595	0.410908	0.0255737
0.792	0.45876	0.0303205	0.407583	0.0266488
0.793	0.457754	0.0302205	0.405311	0.0280449
0.794	0.456102	0.0313442	0.403255	0.0293848
0.795	0.454014	0.0338141	0.40305	0.0281676
0.796	0.452205	0.0344182	0.402223	0.0287681
0.797	0.450443	0.0347198	0.400825	0.028134
0.798	0.448334	0.0334715	0.39818	0.0293631
0.799	0.446384	0.0329195	0.397848	0.0288162
0.8	0.444925	0.0318614	0.397589	0.0278912
0.801	0.444404	0.0307919	0.396262	0.028161
0.802	0.441227	0.030918	0.396091	0.0273333
0.803	0.438225	0.0304792	0.395489	0.0266867
0.804	0.43704	0.0314047	0.394473	0.0262221
0.805	0.433586	0.030058	0.392662	0.0253234
0.806	0.432222	0.0286836	0.391222	0.0265055
0.807	0.430788	0.0271664	0.388543	0.0269763
0.808	0.428932	0.0279783	0.38821	0.0270293
0.809	0.428591	0.0303331	0.388122	0.0260132
0.81	0.426606	0.0330103	0.387897	0.0247329
0.811	0.424555	0.033869	0.387311	0.0243162
0.812	0.42169	0.0339991	0.384538	0.024144
0.813	0.420919	0.034527	0.382508	0.0245703
0.814	0.41914	0.0338071	0.380239	0.0259801
0.815	0.418185	0.0327595	0.378775	0.026177
0.816	0.415476	0.031182	0.377371	0.0266074
0.817	0.415085	0.0331602	0.375152	0.0279932
0.818	0.413334	0.0328328	0.373873	0.0276471
0.819	0.409813	0.0307125	0.373455	0.0273433
0.82	0.408031	0.030104	0.371781	0.026959
0.821	0.405242	0.0284179	0.369281	0.0283181
0.822	0.403735	0.027784	0.366455	0.0288574
0.823	0.400972	0.0298232	0.366684	0.0267439
0.824	0.399687	0.0300469	0.365074	0.0271404
0.825	0.399074	0.0325563	0.365069	0.026506
0.826	0.39761	0.0324444	0.364513	0.0267547
0.827	0.396355	0.0332824	0.362674	0.0263542
0.828	0.393719	0.0325652	0.360588	0.0263546
0.829	0.390441	0.0357186	0.35931	0.027132
0.83	0.387661	0.0314463	0.358295	0.0268212
0.831	0.386506	0.0326157	0.358023	0.026122
0.832	0.386315	0.0313848	0.356591	0.0255483
0.833	0.385479	0.0334246	0.355813	0.0253678
0.834	0.383982	0.0354777	0.354934	0.0265463
0.835	0.382657	0.0340286	0.352381	0.0269632
0.836	0.379964	0.0308898	0.350434	0.0275853
0.837	0.374855	0.0288289	0.349252	0.0268208
0.838	0.372438	0.0297416	0.348256	0.0261615
0.839	0.371849	0.0314474	0.346294	0.0263291
0.84	0.371305	0.0331846	0.344955	0.0250398
0.841	0.372636	0.0348342	0.342796	0.0254331
0.842	0.369813	0.03359	0.341841	0.0248595
0.843	0.366168	0.0335642	0.339427	0.0256125
0.844	0.362265	0.0319924	0.337015	0.0269498
0.845	0.357951	0.0324045	0.335473	0.0274179
0.846	0.358568	0.0316057	0.334856	0.0264132
0.847	0.356498	0.0309262	0.333614	0.0257142
0.848	0.355682	0.0346591	0.331939	0.0250617
0.849	0.353925	0.0352172	0.330856	0.0267067
0.85	0.354313	0.0360744	0.329119	0.0269458
0.851	0.35267	0.0340282	0.327228	0.0278975
0.852	0.348459	0.0315166	0.325813	0.0284004
0.853	0.344066	0.0301705	0.323825	0.0290127
0.854	0.343252	0.030281	0.323199	0.0297082
0.855	0.343535	0.0329355	0.323151	0.0289909
0.856	0.343971	0.0339201	0.322798	0.0269949
0.857	0.341745	0.0344362	0.322892	0.0250991
0.858	0.336955	0.0326312	0.320712	0.0223369
0.859	0.333262	0.031309	0.31827	0.0222197
0.86	0.329995	0.0312045	0.315531	0.0224121
0.861	0.326624	0.0318192	0.312597	0.0234354
0.862	0.3272	0.0327586	0.310698	0.0239302
0.863	0.325017	0.0346552	0.307659	0.0261453
0.864	0.325304	0.0364437	0.305501	0.0275414
0.865	0.323243	0.0371283	0.304659	0.0264395
0.866	0.322032	0.0344775	0.303339	0.0255913
0.867	0.320367	0.0311975	0.303258	0.0251405
0.868	0.317923	0.0283933	0.302539	0.0237091
0.869	0.316072	0.0302545	0.299205	0.0261407
0.87	0.314762	0.0311435	0.297217	0.0286514
0.871	0.313078	0.0333492	0.295597	0.0300438
0.872	0.311086	0.032786	0.294738	0.0301458
0.873	0.305404	0.0324173	0.294872	0.0280127
0.874	0.302128	0.0312112	0.294392	0.0271463
0.875	0.299512	0.0308558	0.294332	0.0257244
0.876	0.297909	0.0325436	0.293857	0.0231995
0.877	0.295656	0.0332287	0.291895	0.0216494
0.878	0.294615	0.0343377	0.287611	0.0226583
0.879	0.29254	0.035217	0.284944	0.0226755
0.88	0.291824	0.0341949	0.28126	0.023688
0.881	0.290219	0.0328156	0.277927	0.0249803
0.882	0.289801	0.0298278	0.275608	0.0261917
0.883	0.291271	0.0278782	0.274029	0.0253364
0.884	0.287816	0.0291409	0.272433	0.025326
0.885	0.285041	0.031105	0.272526	0.0262268
0.886	0.282242	0.0330343	0.267982	0.0280881
0.887	0.277187	0.0335404	0.268105	0.0285343
0.888	0.273284	0.0336421	0.266888	0.0284697
0.889	0.269881	0.032322	0.267507	0.0263321
0.89	0.268584	0.0341712	0.267907	0.026007
0.891	0.266662	0.034068	0.268411	0.0236311
0.892	0.265212	0.0334392	0.266973	0.0222547
0.893	0.26499	0.033312	0.264937	0.0216572
0.894	0.263121	0.0316195	0.261081	0.0218462
0.895	0.26209	0.0318883	0.256148	0.0237011
0.896	0.261281	0.0307978	0.252771	0.0239917
0.897	0.261006	0.030436	0.250863	0.0241833
0.898	0.258163	0.0307106	0.247953	0.0230275
0.899	0.256482	0.0319427	0.246972	0.0227787
0.9	0.252376	0.0335848	0.242862	0.0264387
0.901	0.246807	0.0339703	0.240005	0.0272255
0.902	0.241863	0.0333407	0.239074	0.0277432
0.903	0.238205	0.031706	0.238917	0.0276738
0.904	0.237802	0.0291494	0.239682	0.0266439
0.905	0.235229	0.0280193	0.24029	0.025339
0.906	0.234425	0.02803	0.238383	0.0242966
0.907	0.234673	0.0290799	0.237045	0.0214612
0.908	0.233668	0.0313612	0.235782	0.0224714
0.909	0.232191	0.0320425	0.234239	0.0221528
0.91	0.228968	0.0309468	0.233524	0.0221092
0.911	0.226393	0.0310973	0.228228	0.0216404
0.912	0.224778	0.0322379	0.223702	0.0231425
0.913	0.221371	0.0330309	0.217849	0.024778
0.914	0.217082	0.0313818	0.214077	0.0261875
0.915	0.215129	0.0265837	0.21337	0.0263749
0.916	0.212491	0.023606	0.212701	0.0260247
0.917	0.209424	0.0233862	0.212223	0.0251115
0.918	0.206463	0.0258724	0.211884	0.0247005
0.919	0.204724	0.0294343	0.210065	0.0234442
0.92	0.204503	0.0308439	0.209775	0.0221526
0.921	0.203669	0.0307705	0.208318	0.0234936
0.922	0.200131	0.0320818	0.207586	0.0224619
0.923	0.198051	0.032638	0.205086	0.0220022
0.924	0.194596	0.0335658	0.201602	0.0199294
0.925	0.192395	0.0316837	0.198367	0.0204085
0.926	0.190778	0.0284317	0.194274	0.0215771
0.927	0.187754	0.0258157	0.190983	0.0230336
0.928	0.185858	0.0228405	0.190054	0.0220157
0.929	0.183921	0.0227058	0.185432	0.0221345
0.93	0.180499	0.0253525	0.1833	0.0220291
0.931	0.178282	0.0280457	0.181407	0.0226089
0.932	0.176655	0.0305626	0.181148	0.0220046
0.933	0.174692	0.0322473	0.181795	0.0236758
0.934	0.171899	0.0322753	0.180529	0.0240163
0.935	0.16864	0.0306278	0.1786	0.0213764
0.936	0.165568	0.0267905	0.175372	0.0172731
0.937	0.161921	0.0253372	0.168928	0.0178254
0.938	0.158571	0.0246333	0.167064	0.0196981
0.939	0.155475	0.024719	0.165725	0.0218058
0.94	0.155115	0.0246976	0.166116	0.020891
0.941	0.155322	0.0245721	0.163144	0.019195
0.942	0.152996	0.0270855	0.160574	0.0191439
0.943	0.150622	0.0305192	0.157645	0.018957
0.944	0.147959	0.032609	0.153338	0.0189432
0.945	0.146495	0.0312437	0.150073	0.0196954
0.946	0.14312	0.028874	0.146865	0.0182259
0.947	0.137474	0.0243826	0.144942	0.0146632
0.948	0.133192	0.0225059	0.146204	0.0136885
0.949	0.128265	0.0229961	0.140175	0.0179588
0.95	0.126839	0.0257061	0.139397	0.0183063
0.951	0.126488	0.0255905	0.139508	0.0182309
0.952	0.125254	0.02584	0.137364	0.0186166
0.953	0.124607	0.0276088	0.135976	0.0171579
0.954	0.122656	0.03084	0.13335	0.016454
0.955	0.118167	0.0321744	0.128835	0.0171007
0.956	0.115335	0.0277022	0.123687	0.0164393
0.957	0.111562	0.0266162	0.119178	0.0152096
0.958	0.10993	0.0215535	0.115411	0.0146925
0.959	0.106829	0.0207273	0.11497	0.0126926
0.96	0.102625	0.0211961	0.11193	0.0158215
0.961	0.0992468	0.0235388	0.110399	0.0130006
0.962	0.0961897	0.0270924	0.110747	0.0139583
0.963	0.0953838	0.0290623	0.111976	0.0141198
0.964	0.0926779	0.0304984	0.109738	0.0153147
0.965	0.0895121	0.0289395	0.106476	0.0187183
0.966	0.0853367	0.0254604	0.10051	0.0172641
0.967	0.0835057	0.0212255	0.0936504	0.0133735
0.968	0.0821531	0.0181949	0.0857756	0.0136237
0.969	0.0823466	0.0178554	0.082206	0.0136743
0.97	0.0800921	0.018288	0.082143	0.0114846
0.971	0.0763143	0.0246139	0.0839208	0.012227
0.972	0.0703599	0.0258505	0.0827275	0.0163813
0.973	0.0683679	0.0243893	0.0818339	0.0170506
0.974	0.0670087	0.0233121	0.0799223	0.0151779
0.975	0.0621425	0.0187481	0.0770106	0.0123787
0.976	0.0605877	0.0150421	0.0747125	0.0115733
0.977	0.0578333	0.0133902	0.0701629	0.0126944
0.978	0.05798	0.0102767	0.0648908	0.00888778
0.979	0.0579216	0.0121898	0.0554346	0.00847635
0.98	0.0546493	0.0123308	0.0522086	0.00905719
0.981	0.0508685	0.0184902	0.0482218	0.0100897
0.982	0.0489156	0.0161783	0.0491749	0.00990808
0.983	0.0450002	0.0136699	0.0504252	0.0129685
0.984	0.0405419	0.0101255	0.0496534	0.0190418
0.985	0.0402338	0.0056609	0.0479181	0.0222608
0.986	0.0377303	0.00538175	0.0443668	0.0188099
0.987	0.037399	0.00366856	0.0373568	0.0118374
0.988	0.0364537	0.00234094	0.0328033	0.00372477
0.989	0.0347135	0.00325004	0.0274638	0.0039274
0.99	0.0292915	0.00501209	0.0260968	0.00181186
0.991	0.02353	0.00435222	0.022905	0.00759518
0.992	0.0211855	0.00289853	0.0210632	0.010951
0.993	0.0190189	0.00149694	0.019635	0.0142391
0.994	0.0200568	0.00355904	0.0170601	0.0146916
0.995	0.0191191	0.004249	0.0136802	0.0126701
0.996	0.0145636	0.00325259	0.0116214	0.0111571
0.997	0.0116212	0.00200899	0.0101589	0.0100322
0.998	0.0135445	0.00347777	0.00682513	0.00503613
0.999	0.00750344	0.00107188	0.00270966	0.0019704
1	0	0	0	0

## Sheet: Figure 5 - Panel B
	Slope at height 100 µm
	parental	∆alaE	∆dadAX	∆alaE∆dadAX
Replicate 1	0.519	0.3122	0.531	0.3248
Replicate 2	0.4398	0.3432	0.42	0.3079
Replicate 3	0.4825	0.3348	0.4522	0.3206

## Sheet: Figure 5 - Panel C
	Unstable GFP/mRuby2 fold-change: height 100 vs 0 µm
	parental	ΔalaE	ΔdadAX	ΔalaEΔdadAX
Replicate 1	0.810157	0.787062	0.848125	0.714017
Replicate 2	0.791786	0.714146	0.806355	0.706323
Replicate 3	0.829329	0.784532	0.830465	0.71658
Replicate 4	0.797703	0.733333	0.783826	0.735793
Replicate 5	0.765865	0.732536	0.81591	0.756007
Replicate 6	0.842555		0.811836	0.731553
